# Supplementary material for: Mathematical Model Predicts Effective Strategies to Inhibit VEGF-eNOS Signaling
Source: MDPI journal article supplement (doi:10.3390/jcm9051255), 2020-04-26
Supplement: s1 [file s1]

## List of ODEs (160 total)

### Biochemical species (158 total)

$$d(TSP1)/dt = -konTSP1VEGF*TSP1*VEGF - konTSP1CD47*TSP1*CD47mem + koffTSP1VEGF*TSP1:VEGF + koffTSP1CD47*TSP1:CD47mem ;$$

$$d(VEGF)/dt = -konTSP1VEGF*TSP1*VEGF - konVEGFR2*VEGF*R2mem + koffTSP1VEGF*TSP1:VEGF + koffVEGFR2*VEGF:R2mem - konVEGFR2*VEGF*CD47:R2mem + koffVEGFR2*VEGF:R2:CD47mem ;$$

$$d(R2mem)/dt = -konVEGFR2*VEGF*R2mem - konR2CD47*R2mem*CD47mem - kinterR2*R2mem + ksynR2*null + koffVEGFR2*VEGF:R2mem + koffR2CD47*CD47:R2mem ;$$

$$d(CD47mem)/dt = -konTSP1CD47*TSP1*CD47mem - konR2CD47*R2mem*CD47mem - kinterCD47*CD47mem + ksynCD47*null + koffTSP1CD47*TSP1:CD47mem - konR2CD47*VEGF:R2mem*CD47mem + koffR2CD47*CD47:R2mem - konR2CD47*VEGF:pR2mem*CD47mem + koffR2CD47*VEGF:R2:CD47mem + koffR2CD47*VEGF:pR2:CD47mem ;$$

$$d(Src)/dt = -konSrcHsp90*Src*Hsp90 - konSrcAkt*Src*Akt + koffSrcHsp90*Hsp90:Src + koffSrcAkt*Akt:Src - konSrcpR2*VEGF:pR2cyt*Src - konSrcpR2*VEGF:pR2:CD47cyt*Src + koffSrcpR2*VEGF:pR2cyt:Src + koffSrcpR2*VEGF:pR2cyt:CD47:Src + kdpSrc*pSrc ;$$

$$d(Hsp90)/dt = -konSrcHsp90*Src*Hsp90 - konSrcHsp90*Akt:Src*Hsp90 + koffSrcHsp90*Hsp90:Src + koffSrcHsp90*Akt:Hsp90:Src - konSrcHsp90*pSrc*Hsp90 - konSrcHsp90*pSrc:Akt*Hsp90 + koffSrcHsp90*pSrc:Hsp90 + koffSrcHsp90*pSrc:Hsp90:Akt + kdpHsp90*pHsp90 ;$$

$$d(Akt)/dt = -konSrcAkt*Src*Akt + koffSrcAkt*Akt:Src - konSrcAkt*pSrc*Akt + koffSrcAkt*pSrc:Akt + kdpAkt*pAkt ;$$

$$d(eNOS)/dt = -konbeNOSArg*Arg*eNOS - kon2CeNOS*C:CaM*eNOS - kon2NeNOS*N:CaM*eNOS + koffbeNOSArg*Arg:eNOS + koffCaMeNOS*C:CaM:eNOS + koffCaMeNOS*N:CaM:eNOS - kon4eNOS*CN:CaM*eNOS + koffCaMeNOS*CN:CaM:eNOS - konHsp90eNOS*eNOS*pHsp90 - konAkteNOS*eNOS*pAkt + koffHsp90eNOS*eNOS:pHsp90 + koffAkteNOS*eNOS:pAkt - konHsp90eNOS*eNOS*pAkt:pHsp90 - konHsp90eNOS*eNOS*pAkt:Hsp90 - konHsp90eNOS*eNOS*Akt:pHsp90 + koffHsp90eNOS*eNOS:pHsp90:pAkt - konHsp90eNOS*eNOS*Akt:Hsp90 + koffHsp90eNOS*eNOS:pHsp90:Akt + koffHsp90eNOS*eNOS:Hsp90:pAkt + kdpHsp90eNOS*peNOS + koffHsp90eNOS*eNOS:Hsp90:Akt ;$$

$$d(Ca)/dt = (((((VolER/Volcyto)*I_{IP3R})*(Castore-Ca))*((IP3^{3.8})/((IP3^{3.8})+(KM_{IP3R}^{3.8}))))*((KiCa^{3.8})/((KiCa^{3.8})+(Ca^{3.8}))))*null + (((-I_{PMCA})*(Ca^{1.4})/((KM_{PMCA}^{1.4})+(Ca^{1.4}))+Istim))*null + (((-I_{SERCA})*((Ca/(KM_{SERCA}+Ca))^2)+((kleakER*((Castore-Ca)^2))))*null -2.0*konCa2C*Ca*Ca*CaM -2.0*konCa2N*Ca*Ca*CaM +2.0*koffCa2C*C:CaM +2.0*koffCa2N*N:CaM -2.0*konCa2C*Ca*Ca*N:CaM -2.0*konCa2N*Ca*Ca*C:CaM -2.0*konCa2C*Ca*Ca*C:CaM:eNOS -2.0*konCa2C*Ca*Ca*Arg:N:CaM:eNOS +2.0*koffCa2C*CN:CaM -2.0*konCa2N*Ca*Ca*C:CaM:eNOS -2.0*konCa2N*Ca*Ca*Arg:C:CaM:eNOS +2.0*koffCa2N*CN:CaM +2.0*koffCa2C*CN:CaM:eNOS +2.0*koffCa2N*Arg:CN:CaM:eNOS -2.0*konCa2C*Ca*Ca*N:CaM:eNOS:pHsp90 -2.0*konCa2C*Ca*Ca*Arg:N:CaM:eNOS:pHsp90 -2.0*konCa2C*Ca*Ca*N:CaM:eNOS:pAkt -2.0*konCa2C*Ca*Ca*Arg:N:CaM:eNOS:pAkt +2.0*koffCa2C*CN:CaM:eNOS:pHsp90 +2.0*koffCa2C*Arg:CN:CaM:eNOS:pHsp90 +2.0*koffCa2C*CN:CaM:eNOS:pAkt +2.0*koffCa2C*Arg:CN:CaM:eNOS:pAkt -2.0*konCa2N*Ca*Ca*C:CaM:eNOS:pHsp90 -2.0*konCa2N*Ca*Ca*Arg:C:CaM:eNOS:pHsp90 -2.0*konCa2N*Ca*Ca*C:CaM:eNOS:pAkt -2.0*konCa2N*Ca*Ca*Arg:C:CaM:eNOS:pAkt +2.0*koffCa2N*CN:CaM:eNOS:pHsp90 +2.0*koffCa2N*Arg:CN:CaM:eNOS:pHsp90 +2.0*koffCa2N*CN:CaM:eNOS:pAkt +2.0*koffCa2N*Arg:CN:CaM:eNOS:pAkt -2.0*konCa2C*Ca*Ca*N:CaM:eNOS:pHsp90:pAkt -2.0*konCa2C*Ca*Ca*N:CaM:peNOS -2.0*konCa2C*Ca*Ca*Arg:N:CaM:peNOS +2.0*koffCa2C*CN:CaM:eNOS:pHsp90:pAkt +2.0*koffCa2C*Arg:CN:CaM:eNOS:pHsp90:pAkt +2.0*koffCa2C*CN:CaM:peNOS +2.0*koffCa2C*Arg:CN:CaM:peNOS -2.0*konCa2N*Ca*Ca*C:CaM:eNOS:pHsp90:pAkt -2.0*konCa2N*Ca*Ca*Arg:C:CaM:eNOS:pHsp90:pAkt -2.0*konCa2N*Ca*Ca*C:CaM:peNOS -2.0*konCa2N*Ca*Ca*Arg:C:CaM:peNOS +2.0*koffCa2N*CN:CaM:eNOS:pHsp90:pAkt +2.0*koffCa2N*Arg:CN:CaM:eNOS:pHsp90:pAkt +2.0*koffCa2N*CN:CaM:peNOS +2.0*koffCa2N*Arg:CN:CaM:peNOS -2.0*konCa2C*Ca*Ca*N:CaM:eNOS:pHsp90:Akt -2.0*konCa2C*Ca*Ca*Arg:N:CaM:eNOS:pHsp90:Akt -2.0*konCa2C*Ca*Ca*N:CaM:peNOS:pHsp90 -2.0*konCa2C*Ca*Ca*Arg:N:CaM:peNOS:pHsp90 -2.0*konCa2C*Ca*Ca*N:CaM:eNOS:Hsp90:pAkt -2.0*konCa2C*Ca*Ca*Arg:N:CaM:eNOS:Hsp90:pAkt +2.0*koffCa2C*CN:CaM:eNOS:pHsp90:Akt +2.0*$$

$\text{koffCa2C*Arg:CN:CaM:eNOS:pHsp90:Akt} + 2.0* \text{koffCa2C*CN:CaM:peNOS:pHsp90} + 2.0*$   
 $\text{koffCa2C*Arg:CN:CaM:peNOS:pHsp90} + 2.0* \text{koffCa2C*CN:CaM:eNOS:Hsp90:pAkt} + 2.0*$   
 $\text{koffCa2C*Arg:CN:CaM:eNOS:Hsp90:pAkt} - 2.0* \text{konCa2N*Ca*Ca*C:CaM:eNOS:pHsp90:Akt} - 2.0*$   
 $\text{konCa2N*Ca*Ca*Arg:C:CaM:eNOS:pHsp90:Akt} - 2.0* \text{konCa2N*Ca*Ca*C:CaM:peNOS:pHsp90} - 2.0*$   
 $\text{konCa2N*Ca*Ca*Arg:C:CaM:peNOS:pHsp90} - 2.0* \text{konCa2N*Ca*Ca*C:CaM:eNOS:Hsp90:pAkt} - 2.0*$   
 $\text{konCa2N*Ca*Ca*Arg:C:CaM:eNOS:Hsp90:pAkt} + 2.0* \text{koffCa2N*CN:CaM:eNOS:pHsp90:Akt} + 2.0*$   
 $\text{koffCa2N*Arg:CN:CaM:eNOS:pHsp90:Akt} + 2.0* \text{koffCa2N*CN:CaM:peNOS:pHsp90} + 2.0*$   
 $\text{koffCa2N*Arg:CN:CaM:peNOS:pHsp90} + 2.0* \text{koffCa2N*CN:CaM:eNOS:Hsp90:pAkt} + 2.0*$   
 $\text{koffCa2N*Arg:CN:CaM:eNOS:Hsp90:pAkt} - 2.0* \text{konCa2C*Ca*Ca*N:CaM:eNOS:Hsp90:Akt} - 2.0*$   
 $\text{konCa2C*Ca*Ca*Arg:N:CaM:eNOS:Hsp90:Akt} - 2.0* \text{konCa2C*Ca*Ca*N:CaM:eNOS:Hsp90} - 2.0*$   
 $\text{konCa2C*Ca*Ca*Arg:N:CaM:eNOS:Hsp90} - 2.0* \text{konCa2C*Ca*Ca*N:CaM:eNOS:Akt} - 2.0*$   
 $\text{konCa2C*Ca*Ca*Arg:N:CaM:eNOS:Akt} + 2.0* \text{koffCa2C*CN:CaM:eNOS:Hsp90:Akt} + 2.0*$   
 $\text{koffCa2C*Arg:CN:CaM:eNOS:Hsp90:Akt} + 2.0* \text{koffCa2C*CN:CaM:eNOS:Hsp90} + 2.0*$   
 $\text{koffCa2C*Arg:CN:CaM:eNOS:Hsp90} + 2.0* \text{koffCa2C*CN:CaM:eNOS:Hsp90:Akt} + 2.0*$   
 $\text{koffCa2C*Arg:CN:CaM:eNOS:Hsp90:Akt} - 2.0* \text{konCa2N*Ca*Ca*C:CaM:eNOS:Hsp90:Akt} - 2.0*$   
 $\text{konCa2N*Ca*Ca*Arg:C:CaM:eNOS:Hsp90:Akt} - 2.0* \text{konCa2N*Ca*Ca*C:CaM:eNOS:Hsp90} - 2.0*$   
 $\text{konCa2N*Ca*Ca*Arg:C:CaM:eNOS:Hsp90} - 2.0* \text{konCa2N*Ca*Ca*C:CaM:eNOS:Akt} - 2.0*$   
 $\text{konCa2N*Ca*Ca*Arg:C:CaM:eNOS:Akt} + 2.0* \text{koffCa2N*CN:CaM:eNOS:Hsp90:Akt} + 2.0*$   
 $\text{koffCa2N*Arg:CN:CaM:eNOS:Hsp90:Akt} + 2.0* \text{koffCa2N*CN:CaM:eNOS:Hsp90} + 2.0*$   
 $\text{koffCa2N*Arg:CN:CaM:eNOS:Hsp90} + 2.0* \text{koffCa2N*CN:CaM:eNOS:Hsp90:Akt} + 2.0*$   
 $\text{koffCa2N*Arg:CN:CaM:eNOS:Hsp90:Akt} ;$

$d(\text{CaM})/dt = - \text{konCa2C*Ca*Ca*CaM} - \text{konCa2N*Ca*Ca*CaM} + \text{koffCa2C*C:CaM} + \text{koffCa2N*N:CaM} ;$

$d(\text{Arg})/dt = - \text{konbeNOSArg*Arg*eNOS} + \text{koffbeNOSArg*Arg:eNOS} - \text{koneNOSArg*Arg*C:CaM:eNOS} -$   
 $\text{koneNOSArg*Arg*N:CaM:eNOS} + \text{koffeNOSArg*Arg:C:CaM:eNOS} + \text{koffeNOSArg*Arg:N:CaM:eNOS} -$   
 $\text{koneNOSArg*Arg*CN:CaM:eNOS} + \text{koffeNOSArg*Arg:CN:CaM:eNOS} - \text{konbeNOSArg*Arg*eNOS:pHsp90} -$   
 $\text{konbeNOSArg*Arg*eNOS:pAkt} + \text{koffbeNOSArg*Arg:eNOS:pHsp90} + \text{koffbeNOSArg*Arg:eNOS:pAkt} -$   
 $\text{koneNOSArg*Arg*C:CaM:eNOS:pAkt} - \text{koneNOSArg*Arg*N:CaM:eNOS:pAkt} - \text{koneNOSArg*Arg*CN:CaM:eNOS:pAkt}$   
 $+ \text{koffeNOSArg*Arg:C:CaM:eNOS:pAkt} + \text{koffeNOSArg*Arg:N:CaM:eNOS:pAkt} +$   
 $\text{koffeNOSArg*Arg:CN:CaM:eNOS:pAkt} - \text{koneNOSArg\_H*Arg*C:CaM:eNOS:pHsp90} -$   
 $\text{koneNOSArg\_H*Arg*N:CaM:eNOS:pHsp90} - \text{koneNOSArg\_H*Arg*CN:CaM:eNOS:pHsp90} +$   
 $\text{koffeNOSArg\_H*Arg:C:CaM:eNOS:pHsp90} + \text{koffeNOSArg\_H*Arg:N:CaM:eNOS:pHsp90} +$   
 $\text{koffeNOSArg\_H*Arg:CN:CaM:eNOS:pHsp90} - \text{konbeNOSArg*Arg*eNOS:pHsp90:pAkt} +$   
 $\text{koffbeNOSArg*Arg:eNOS:pHsp90:pAkt} - \text{konpeNOSArg*Arg*C:CaM:peNOS} - \text{konpeNOSArg*Arg*N:CaM:peNOS} -$   
 $\text{konpeNOSArg*Arg*CN:CaM:peNOS} + \text{koffpeNOSArg*Arg:C:CaM:peNOS} + \text{koffpeNOSArg*Arg:N:CaM:peNOS} +$   
 $\text{koffpeNOSArg*Arg:CN:CaM:peNOS} - \text{koneNOSArg\_H*Arg*C:CaM:eNOS:pHsp90:pAkt} -$   
 $\text{koneNOSArg\_H*Arg*N:CaM:eNOS:pHsp90:pAkt} - \text{koneNOSArg\_H*Arg*CN:CaM:eNOS:pHsp90:pAkt} +$   
 $\text{koffeNOSArg\_H*Arg:C:CaM:eNOS:pHsp90:pAkt} + \text{koffeNOSArg\_H*Arg:N:CaM:eNOS:pHsp90:pAkt} +$   
 $\text{koffeNOSArg\_H*Arg:CN:CaM:eNOS:pHsp90:pAkt} - \text{konbeNOSArg*Arg*eNOS:pHsp90:Akt} -$   
 $\text{konbeNOSArg*Arg*eNOS:Hsp90:pAkt} + \text{koffbeNOSArg*Arg:eNOS:pHsp90:Akt} +$   
 $\text{koffbeNOSArg*Arg:eNOS:Hsp90:pAkt} - \text{konpeNOSArg*Arg*peNOS} + \text{koffpeNOSArg*Arg:peNOS} -$   
 $\text{koneNOSArg\_H*Arg*C:CaM:eNOS:pHsp90:Akt} - \text{koneNOSArg\_H*Arg*N:CaM:eNOS:pHsp90:Akt} -$   
 $\text{koneNOSArg\_H*Arg*CN:CaM:eNOS:pHsp90:Akt} - \text{koneNOSArg\_H*Arg*C:CaM:eNOS:Hsp90:pAkt} -$   
 $\text{koneNOSArg\_H*Arg*N:CaM:eNOS:Hsp90:pAkt} - \text{koneNOSArg\_H*Arg*CN:CaM:eNOS:Hsp90:pAkt} +$   
 $\text{koffeNOSArg\_H*Arg:C:CaM:eNOS:pHsp90:Akt} + \text{koffeNOSArg\_H*Arg:N:CaM:eNOS:pHsp90:Akt} +$   
 $\text{koffeNOSArg\_H*Arg:CN:CaM:eNOS:pHsp90:Akt} + \text{koffeNOSArg\_H*Arg:C:CaM:eNOS:Hsp90:pAkt} +$   
 $\text{koffeNOSArg\_H*Arg:N:CaM:eNOS:Hsp90:pAkt} + \text{koffeNOSArg\_H*Arg:CN:CaM:eNOS:Hsp90:pAkt} -$   
 $\text{konpeNOSArg\_H*Arg*C:CaM:peNOS:pHsp90} - \text{konpeNOSArg\_H*Arg*N:CaM:peNOS:pHsp90} -$   
 $\text{konpeNOSArg\_H*Arg*CN:CaM:peNOS:pHsp90} + \text{koffpeNOSArg\_H*Arg:C:CaM:peNOS:pHsp90} +$   
 $\text{koffpeNOSArg\_H*Arg:N:CaM:peNOS:pHsp90} + \text{koffpeNOSArg\_H*Arg:CN:CaM:peNOS:pHsp90} -$   
 $\text{konbeNOSArg*Arg*eNOS:Hsp90:Akt} - \text{konbeNOSArg*Arg*eNOS:Hsp90} - \text{konbeNOSArg*Arg*Akt:eNOS} +$   
 $\text{koffbeNOSArg*Arg:eNOS:Hsp90:Akt} + \text{koffbeNOSArg*Arg:eNOS:Hsp90} + \text{koffbeNOSArg*Arg:Akt:eNOS} -$   
 $\text{koneNOSArg*Arg*C:CaM:eNOS:Akt} - \text{koneNOSArg*Arg*N:CaM:eNOS:Akt} -$   
 $\text{koneNOSArg*Arg*CN:CaM:eNOS:Hsp90:Akt} + \text{koffeNOSArg*Arg:C:CaM:eNOS:Akt} +$   
 $\text{koffeNOSArg*Arg:N:CaM:eNOS:Akt} + \text{koffeNOSArg*Arg:CN:CaM:eNOS:Hsp90:Akt} -$   
 $\text{koneNOSArg\_H*Arg*C:CaM:eNOS:Hsp90:Akt} - \text{koneNOSArg\_H*Arg*N:CaM:eNOS:Hsp90:Akt} -$   
 $\text{koneNOSArg\_H*Arg*CN:CaM:eNOS:Hsp90:Akt} - \text{koneNOSArg\_H*Arg*C:CaM:eNOS:Hsp90} -$   
 $\text{koneNOSArg\_H*Arg*N:CaM:eNOS:Hsp90} - \text{koneNOSArg\_H*Arg*CN:CaM:eNOS:Hsp90} +$

$\text{koffeNOSArg\_H*Arg:C:CaM:eNOS:Hsp90:Akt} + \text{koffeNOSArg\_H*Arg:N:CaM:eNOS:Hsp90:Akt} +$   
 $\text{koffeNOSArg\_H*Arg:CN:CaM:eNOS:Hsp90:Akt} + \text{koffeNOSArg\_H*Arg:C:CaM:eNOS:Hsp90} +$   
 $\text{koffeNOSArg\_H*Arg:N:CaM:eNOS:Hsp90} + \text{koffeNOSArg\_H*Arg:CN:CaM:eNOS:Hsp90} -$   
 $\text{konpeNOSArg\_H*Arg*peNOS:pHsp90} + \text{koffpeNOSArg\_H*Arg:peNOS:pHsp90} ;$

$d(\text{sGC\_b})/dt = -\text{kf6*sGC\_b} + \text{kr6*sGC} - \text{konNOsGC*sGC\_b*NO} + \text{koffNOsGC*sGC\_6c} ;$

$d(\text{GTP})/dt = -\text{kcatsGC*GTP*sGC\_5c} ;$

$d(\text{NObuffer})/dt = \text{kclearNO*NO} ;$

$d(\text{PIP2})/dt = \text{ksynPIP2*null} - \text{RF2(parameters,observables)*pPLCg*PIP2} ;$

$d(\text{PLCg})/dt = -(\text{kpPLCg}/(\text{KM\_PLCgR2}+\text{PLCg}))*\text{PLCg*VEGF:pR2mem} - (\text{kpPLCg}/(\text{KM\_PLCgR2}+\text{PLCg}))*\text{PLCg*VEGF:pR2:CD47mem} -$   
 $(\text{kpPLCg}/(\text{KM\_PLCgR2}+\text{PLCg}))*\text{PLCg*VEGF:pR2cyt} + \text{kdpPLCg*pPLCg} -$   
 $(\text{kpPLCg}/(\text{KM\_PLCgR2}+\text{PLCg}))*\text{PLCg*VEGF:pR2:CD47cyt} - (\text{kpPLCg}/(\text{KM\_PLCgR2}+\text{PLCg}))*\text{PLCg*VEGF:pR2cyt:Src} -$   
 $(\text{kpPLCg}/(\text{KM\_PLCgR2}+\text{PLCg}))*\text{PLCg*VEGF:pR2cyt:Src:Hsp90} -$   
 $(\text{kpPLCg}/(\text{KM\_PLCgR2}+\text{PLCg}))*\text{PLCg*VEGF:pR2cyt:Src:Akt} -$   
 $(\text{kpPLCg}/(\text{KM\_PLCgR2}+\text{PLCg}))*\text{PLCg*VEGF:pR2cyt:Src:Akt:Hsp90} -$   
 $(\text{kpPLCg}/(\text{KM\_PLCgR2}+\text{PLCg}))*\text{PLCg*VEGF:pR2cyt:CD47:Src} -$   
 $(\text{kpPLCg}/(\text{KM\_PLCgR2}+\text{PLCg}))*\text{PLCg*VEGF:pR2cyt:CD47:Src:Hsp90} -$   
 $(\text{kpPLCg}/(\text{KM\_PLCgR2}+\text{PLCg}))*\text{PLCg*VEGF:pR2cyt:CD47:Src:Akt} -$   
 $(\text{kpPLCg}/(\text{KM\_PLCgR2}+\text{PLCg}))*\text{PLCg*VEGF:pR2cyt:CD47:Src:Akt:Hsp90} ;$

$d(\text{Istim})/dt = ((((((\text{Volext}/\text{Volcyto})*\text{Ca\_ext})-\text{Ca})*\text{ICRAC})*((\text{KCRAC}^{\text{n\_CRAC}})/((\text{KCRAC}^{\text{n\_CRAC}})+(\text{Castore}^{\text{n\_CRAC}})))))/\text{t\_stim}-$   
 $(\text{Istim}/\text{t\_stim}))*\text{null} ;$

$d(\text{Castore})/dt = ((((-\text{I\_IP3R})*(\text{Castore}-$   
 $\text{Ca}))*(\text{IP3}^{\text{3.8}})/((\text{IP3}^{\text{3.8}})+(\text{KM\_IP3R}^{\text{3.8}})))*((\text{KiCa}^{\text{3.8}})/((\text{KiCa}^{\text{3.8}})+(\text{Ca}^{\text{3.8}}))))*(1/(1+(\text{CSQN}/((\text{K\_CSQN}+\text{Castore})^{\text{2}}))))$   
 $))*\text{null} + (((\text{I\_SERCA}*((\text{Ca}/(\text{KM\_SERCA}+\text{Ca}))^{\text{2}}))*(\text{Volcyto}/\text{VolER}))*1/(1+(\text{CSQN}/((\text{K\_CSQN}+\text{Castore})^{\text{2}}))))); * \text{null} +$   
 $(((-\text{kIleakER})*(\text{Volcyto}/\text{VolER}))*((\text{Castore}-\text{Ca})^{\text{2}}))*1/(1+(\text{CSQN}/((\text{K\_CSQN}+\text{Castore})^{\text{2}}))))); * \text{null} ;$

$d(\text{PDE})/dt = -\text{koncGMPPDE*cGMP*PDE} + \text{koffcGMPPDE*cGMP:PDE} ;$

$d(\text{TSP1:VEGF})/dt = \text{konTSP1VEGF*TSP1*VEGF} - \text{koffTSP1VEGF*TSP1:VEGF} - \text{kdegVEGF*TSP1:VEGF} ;$

$d(\text{VEGF:R2mem})/dt = \text{konVEGFR2*VEGF*R2mem} - \text{koffVEGFR2*VEGF:R2mem} - \text{konR2CD47*VEGF:R2mem*CD47mem} -$   
 $\text{kinterR2*VEGF:R2mem} - \text{kpR2*VEGF:R2mem} + \text{koffR2CD47*VEGF:R2:CD47mem} + \text{kdpR2*VEGF:pR2mem} ;$

$d(\text{TSP1:CD47mem})/dt = \text{konTSP1CD47*TSP1*CD47mem} - \text{koffTSP1CD47*TSP1:CD47mem} - \text{kinterTSP1bd*TSP1:CD47mem} ;$

$d(\text{CD47:R2mem})/dt = \text{konR2CD47*R2mem*CD47mem} - \text{konVEGFR2*VEGF*CD47:R2mem} - \text{koffR2CD47*CD47:R2mem} -$   
 $\text{kinterR2CD47*CD47:R2mem} + \text{koffVEGFR2*VEGF:R2:CD47mem} ;$

$d(\text{R2cyt})/dt = \text{kinterR2*R2mem} - \text{kdegR2*R2cyt} ;$

$d(\text{CD47cyt})/dt = \text{kinterCD47*CD47mem} - \text{kdegCD47*CD47cyt} ;$

$d(\text{Hsp90:Src})/dt = \text{konSrcHsp90*Src*Hsp90} - \text{koffSrcHsp90*Hsp90:Src} - \text{konSrcpR2*VEGF:pR2cyt*Hsp90:Src} -$   
 $\text{konSrcpR2*VEGF:pR2:CD47cyt*Hsp90:Src} + \text{koffSrcpR2*VEGF:pR2cyt:Src:Hsp90} +$   
 $\text{koffSrcpR2*VEGF:pR2cyt:CD47:Src:Hsp90} + \text{kdpSrc*pSrc:Hsp90} ;$

$d(\text{Akt:Src})/dt = \text{konSrcAkt*Src*Akt} - \text{konSrcHsp90*Akt:Src*Hsp90} - \text{koffSrcAkt*Akt:Src} + \text{koffSrcHsp90*Akt:Hsp90:Src} -$   
 $\text{konSrcpR2*VEGF:pR2cyt*Akt:Src} - \text{konSrcpR2*VEGF:pR2:CD47cyt*Akt:Src} + \text{koffSrcpR2*VEGF:pR2cyt:Src:Akt} +$   
 $\text{koffSrcpR2*VEGF:pR2cyt:CD47:Src:Akt} + \text{kdpSrc*pSrc:Akt} ;$

$d(\text{C:CaM})/dt = \text{konCa2C*Ca*Ca*CaM} - \text{koffCa2C*C:CaM} - \text{konCa2N*Ca*Ca*C:CaM} - \text{kon2CeNOS*C:CaM*eNOS} -$   
 $\text{kon2CeNOS*C:CaM*Arg:eNOS} + \text{koffCa2N*CN:CaM} + \text{koffCaMeNOS*C:CaM:eNOS} +$   
 $\text{koffCaMeNOS*Arg:C:CaM:eNOS} - \text{kon2CeNOS\_H*C:CaM*eNOS:pHsp90} - \text{kon2CeNOS\_H*C:CaM*Arg:eNOS:pHsp90}$   
 $+ \text{koffCaMeNOS\_H*C:CaM:eNOS:pHsp90} + \text{koffCaMeNOS\_H*Arg:C:CaM:eNOS:pHsp90} -$   
 $\text{kon2CpeNOS*C:CaM*eNOS:pAkt} - \text{kon2CpeNOS*C:CaM*Arg:eNOS:pAkt} + \text{koffCaMpeNOS*C:CaM:eNOS:pAkt} +$   
 $\text{koffCaMpeNOS*Arg:C:CaM:eNOS:pAkt} - \text{kon2CeNOS\_H*C:CaM*eNOS:pHsp90:pAkt} -$   
 $\text{kon2CeNOS\_H*C:CaM*Arg:eNOS:pHsp90:pAkt} + \text{koffCaMeNOS\_H*C:CaM:eNOS:pHsp90:pAkt} +$   
 $\text{koffCaMeNOS\_H*Arg:C:CaM:eNOS:pHsp90:pAkt} + \text{koffCaMpeNOS*C:CaM:peNOS} +$   
 $\text{koffCaMpeNOS*Arg:C:CaM:peNOS} - \text{kon2CpeNOS\_H*C:CaM*eNOS:pHsp90:pAkt} -$   
 $\text{kon2CpeNOS\_H*C:CaM*Arg:eNOS:pHsp90:pAkt} + \text{koffCaMpeNOS\_H*C:CaM:eNOS:pHsp90:pAkt} +$

$\text{koffCaMpeNOS\_H*Arg:C:CaM:eNOS:pHsp90:pAkt} - \text{kon2CeNOS\_H*C:CaM*eNOS:pHsp90:Akt} -$   
 $\text{kon2CeNOS\_H*C:CaM*Arg:eNOS:pHsp90:Akt} - \text{kon2CeNOS\_H*C:CaM*eNOS:Hsp90:pAkt} -$   
 $\text{kon2CeNOS\_H*C:CaM*Arg:eNOS:Hsp90:pAkt} + \text{koffCaMeNOS\_H*C:CaM:eNOS:pHsp90:Akt} +$   
 $\text{koffCaMeNOS\_H*Arg:C:CaM:eNOS:pHsp90:Akt} + \text{koffCaMeNOS\_H*C:CaM:eNOS:Hsp90:pAkt} +$   
 $\text{koffCaMeNOS\_H*Arg:C:CaM:eNOS:Hsp90:pAkt} - \text{kon2CpeNOS*C:CaM*peNOS} - \text{kon2CpeNOS*C:CaM*Arg:peNOS} +$   
 $\text{koffCaMpeNOS\_H*C:CaM:peNOS:pHsp90} + \text{koffCaMpeNOS\_H*Arg:C:CaM:peNOS:pHsp90} -$   
 $\text{kon2CpeNOS\_H*C:CaM*eNOS:pHsp90:Akt} - \text{kon2CpeNOS\_H*C:CaM*Arg:eNOS:pHsp90:Akt} +$   
 $\text{koffCaMpeNOS\_H*C:CaM:eNOS:pHsp90:Akt} + \text{koffCaMpeNOS\_H*Arg:C:CaM:eNOS:pHsp90:Akt} -$   
 $\text{kon2CeNOS\_H*C:CaM*eNOS:Hsp90:Akt} - \text{kon2CeNOS\_H*C:CaM*Arg:eNOS:Hsp90:Akt} -$   
 $\text{kon2CeNOS\_H*C:CaM*eNOS:Hsp90} - \text{kon2CeNOS\_H*C:CaM*Arg:eNOS:Hsp90} +$   
 $\text{koffCaMeNOS\_H*C:CaM:eNOS:Hsp90:Akt} + \text{koffCaMeNOS\_H*Arg:C:CaM:eNOS:Hsp90:Akt} +$   
 $\text{koffCaMeNOS\_H*C:CaM:eNOS:Hsp90} + \text{koffCaMeNOS\_H*Arg:C:CaM:eNOS:Hsp90} -$   
 $\text{kon2CpeNOS\_H*C:CaM*peNOS:pHsp90} - \text{kon2CpeNOS\_H*C:CaM*Arg:peNOS:pHsp90} -$   
 $\text{kon2CpeNOS*C:CaM*Akt:eNOS} - \text{kon2CpeNOS*C:CaM*Arg:Akt:eNOS} + \text{koffCaMpeNOS*C:CaM:eNOS:Akt} +$   
 $\text{koffCaMpeNOS*Arg:C:CaM:eNOS:Akt} ;$

$d(\text{N:CaM})/dt = \text{konCa2N*Ca*Ca*CaM} - \text{koffCa2N*N:CaM} - \text{konCa2C*Ca*Ca*N:CaM} - \text{kon2NeNOS*N:CaM*eNOS} -$   
 $\text{kon2NeNOS*N:CaM*Arg:eNOS} + \text{koffCa2C*CN:CaM} + \text{koffCaMeNOS*C:CaM:eNOS} +$   
 $\text{koffCaMeNOS*Arg:N:CaM:eNOS} - \text{kon2NeNOS\_H*N:CaM*eNOS:pHsp90} - \text{kon2NeNOS\_H*N:CaM*Arg:eNOS:pHsp90}$   
 $+ \text{koffCaMeNOS\_H*N:CaM:eNOS:pHsp90} + \text{koffCaMeNOS\_H*Arg:N:CaM:eNOS:pHsp90} -$   
 $\text{kon2NpeNOS*N:CaM*eNOS:pAkt} - \text{kon2NpeNOS*N:CaM*Arg:eNOS:pAkt} + \text{koffCaMpeNOS*N:CaM:eNOS:pAkt} +$   
 $\text{koffCaMpeNOS*Arg:N:CaM:eNOS:pAkt} - \text{kon2NeNOS\_H*N:CaM*eNOS:pHsp90:pAkt} -$   
 $\text{kon2NeNOS\_H*N:CaM*Arg:eNOS:pHsp90:pAkt} + \text{kon2NeNOS\_H*N:CaM*Arg:eNOS:pHsp90:pAkt} +$   
 $\text{koffCaMeNOS\_H*Arg:N:CaM:eNOS:pHsp90:pAkt} + \text{koffCaMpeNOS*N:CaM:peNOS} +$   
 $\text{koffCaMpeNOS*Arg:N:CaM:peNOS} - \text{kon2NpeNOS\_H*N:CaM*eNOS:pHsp90:pAkt} -$   
 $\text{kon2NpeNOS\_H*N:CaM*Arg:eNOS:pHsp90:pAkt} + \text{koffCaMpeNOS\_H*N:CaM:eNOS:pHsp90:pAkt} +$   
 $\text{koffCaMeNOS\_H*Arg:N:CaM:eNOS:pHsp90:Akt} + \text{koffCaMeNOS\_H*N:CaM:eNOS:Hsp90:pAkt} +$   
 $\text{koffCaMeNOS\_H*Arg:N:CaM:eNOS:Hsp90:pAkt} - \text{kon2NpeNOS*N:CaM*peNOS} - \text{kon2NpeNOS*N:CaM*Arg:peNOS} +$   
 $\text{koffCaMpeNOS\_H*N:CaM:peNOS:pHsp90} + \text{koffCaMpeNOS\_H*Arg:N:CaM:peNOS:pHsp90} -$   
 $\text{kon2NpeNOS\_H*N:CaM*eNOS:pHsp90:Akt} - \text{kon2NpeNOS\_H*N:CaM*Arg:eNOS:pHsp90:Akt} +$   
 $\text{koffCaMpeNOS\_H*N:CaM:eNOS:pHsp90:Akt} + \text{koffCaMpeNOS\_H*Arg:N:CaM:eNOS:pHsp90:Akt} -$   
 $\text{kon2NeNOS\_H*N:CaM*eNOS:Hsp90:Akt} - \text{kon2NeNOS\_H*N:CaM*Arg:eNOS:Hsp90:Akt} -$   
 $\text{kon2NeNOS\_H*N:CaM*eNOS:Hsp90} - \text{kon2NeNOS\_H*N:CaM*Arg:eNOS:Hsp90} +$   
 $\text{koffCaMeNOS\_H*N:CaM:eNOS:Hsp90:Akt} + \text{koffCaMeNOS\_H*Arg:N:CaM:eNOS:Hsp90:Akt} +$   
 $\text{koffCaMeNOS\_H*N:CaM:eNOS:Hsp90} + \text{koffCaMeNOS\_H*Arg:N:CaM:eNOS:Hsp90} -$   
 $\text{kon2NpeNOS\_H*N:CaM*peNOS:pHsp90} - \text{kon2NpeNOS\_H*N:CaM*Arg:peNOS:pHsp90} -$   
 $\text{kon2NpeNOS*N:CaM*Akt:eNOS} - \text{kon2NpeNOS*N:CaM*Arg:Akt:eNOS} + \text{koffCaMpeNOS*N:CaM:eNOS:Akt} +$   
 $\text{koffCaMpeNOS*Arg:N:CaM:eNOS:Akt} ;$

$d(\text{Arg:eNOS})/dt = \text{konbeNOSArg*Arg*eNOS} - \text{kon2CeNOS*C:CaM*Arg:eNOS} - \text{kon2NeNOS*N:CaM*Arg:eNOS} -$   
 $\text{koffbeNOSArg*Arg:eNOS} + \text{koffCaMeNOS*Arg:C:CaM:eNOS} + \text{koffCaMeNOS*Arg:N:CaM:eNOS} -$   
 $\text{kon4eNOS*CN:CaM*Arg:eNOS} + \text{koffCaMeNOS*Arg:CN:CaM:eNOS} - \text{konHsp90eNOS*Arg:eNOS*pHsp90} -$   
 $\text{konAkteNOS*Arg:eNOS*pAkt} + \text{koffHsp90eNOS*Arg:eNOS:pHsp90} + \text{koffAkteNOS*Arg:eNOS:pAkt} -$   
 $\text{konHsp90eNOS*Arg:eNOS*pAkt:pHsp90} - \text{konHsp90eNOS*Arg:eNOS*pAkt:Hsp90} -$   
 $\text{konHsp90eNOS*Arg:eNOS*Akt:pHsp90} + \text{koffHsp90eNOS*Arg:eNOS:pHsp90:pAkt} -$   
 $\text{konHsp90eNOS*Arg:eNOS*Akt:Hsp90} + \text{koffHsp90eNOS*Arg:eNOS:pHsp90:Akt} +$   
 $\text{koffHsp90eNOS*Arg:eNOS:Hsp90:pAkt} + \text{kdpeNOS*Arg:peNOS} + \text{koffHsp90eNOS*Arg:eNOS:Hsp90:Akt} ;$

$d(\text{sGC})/dt = \text{kf6*sGC\_b} - \text{kr6*sGC} - \text{kf\_GC\_NO*sGC*NO} + \text{kr\_GC\_NO*sGC*NO} ;$

$d(\text{VEGF:R2:CD47mem})/dt = \text{konVEGFR2*VEGF*CD47:R2mem} + \text{konR2CD47*VEGF:R2mem*CD47mem} -$   
 $\text{koffVEGFR2*VEGF:R2:CD47mem} - \text{koffR2CD47*VEGF:R2:CD47mem} - \text{kinterR2CD47*VEGF:R2:CD47mem} -$   
 $\text{kpR2*VEGF:R2:CD47mem} + \text{kdpr2CD47bd*VEGF:pR2:CD47mem} ;$

$d(\text{VEGF:R2cyt})/dt = \text{kinterR2*VEGF:R2mem} - \text{kpR2*VEGF:R2cyt} - \text{kdegR2*VEGF:R2cyt} + \text{kdpr2*VEGF:pR2cyt} ;$

$d(\text{CD47:R2cyt})/dt = \text{kinterR2CD47*CD47:R2mem} - \text{kdegCD47*CD47:R2cyt} ;$

$d(\text{TSP1:CD47cyt})/dt = \text{kinterTSP1bd*TSP1:CD47mem} - \text{kdegCD47*TSP1:CD47cyt} ;$

$d(\text{VEGF:pR2mem})/dt = \text{kpR2*VEGF:R2mem} - \text{konR2CD47*VEGF:pR2mem*CD47mem} - \text{kinterpR2*VEGF:pR2mem} - \text{kdpR2*VEGF:pR2mem} + \text{koffR2CD47*VEGF:pR2:CD47mem} ;$

$d(\text{Akt:Hsp90:Src})/dt = \text{konSrcHsp90*Akt:Src:Hsp90} - \text{koffSrcHsp90*Akt:Hsp90:Src} - \text{konSrcpR2*VEGF:pR2cyt*Akt:Hsp90:Src} - \text{konSrcpR2*VEGF:pR2:CD47cyt*Akt:Hsp90:Src} + \text{koffSrcpR2*VEGF:pR2cyt:Src:Akt:Hsp90} + \text{koffSrcpR2*VEGF:pR2cyt:CD47:Src:Akt:Hsp90} + \text{kdpSrc*pSrc:Hsp90:Akt} ;$

$d(\text{CN:CaM})/dt = \text{konCa2C*Ca*Ca*N:CaM} + \text{konCa2N*Ca*Ca*C:CaM} - \text{koffCa2C*CN:CaM} - \text{koffCa2N*CN:CaM} - \text{kon4eNOS*CN:CaM*eNOS} - \text{kon4eNOS*CN:CaM*Arg:eNOS} + \text{koffCaMeNOS*CN:CaM:eNOS} + \text{koffCaMeNOS*Arg:CN:CaM:eNOS} - \text{kon4eNOS_H*CN:CaM*eNOS:pHsp90} - \text{kon4eNOS_H*CN:CaM*Arg:eNOS:pHsp90} + \text{koffCaMeNOS_H*CN:CaM:eNOS:pHsp90} + \text{koffCaMeNOS_H*Arg:CN:CaM:eNOS:pHsp90} - \text{kon4peNOS*CN:CaM*eNOS:pAkt} - \text{kon4peNOS*CN:CaM*Arg:eNOS:pAkt} + \text{koffCaMpeNOS*CN:CaM:eNOS:pAkt} + \text{koffCaMpeNOS*Arg:CN:CaM:eNOS:pAkt} - \text{kon4eNOS_H*CN:CaM*eNOS:pHsp90:pAkt} - \text{kon4eNOS_H*CN:CaM*Arg:eNOS:pHsp90:pAkt} + \text{koffCaMeNOS_H*CN:CaM:eNOS:pHsp90:pAkt} + \text{koffCaMeNOS_H*Arg:CN:CaM:eNOS:pHsp90:pAkt} + \text{koffCaMpeNOS*CN:CaM:peNOS} + \text{koffCaMpeNOS*CN:CaM:peNOS} - \text{kon4peNOS_H*CN:CaM*eNOS:pHsp90:pAkt} - \text{kon4peNOS_H*CN:CaM*Arg:eNOS:pHsp90:pAkt} + \text{koffCaMpeNOS_H*CN:CaM:eNOS:pHsp90:pAkt} + \text{koffCaMpeNOS_H*Arg:CN:CaM:eNOS:pHsp90:pAkt} - \text{kon4eNOS_H*CN:CaM*Arg:eNOS:pHsp90:Akt} - \text{kon4eNOS_H*CN:CaM*eNOS:Hsp90:pAkt} - \text{kon4eNOS_H*CN:CaM*Arg:eNOS:Hsp90:pAkt} + \text{koffCaMeNOS_H*CN:CaM:eNOS:pHsp90:Akt} + \text{koffCaMeNOS_H*Arg:CN:CaM:eNOS:Hsp90:pAkt} - \text{kon4peNOS*CN:CaM*peNOS} - \text{kon4peNOS*CN:CaM*Arg:peNOS} + \text{koffCaMpeNOS_H*CN:CaM:peNOS:pHsp90} + \text{koffCaMpeNOS_H*Arg:CN:CaM:peNOS:pHsp90} - \text{kon4peNOS_H*CN:CaM*eNOS:pHsp90:Akt} - \text{kon4peNOS_H*CN:CaM*Arg:eNOS:pHsp90:Akt} + \text{koffCaMpeNOS_H*CN:CaM:eNOS:pHsp90:Akt} + \text{koffCaMpeNOS_H*Arg:CN:CaM:eNOS:pHsp90:Akt} - \text{kon4eNOS_H*CN:CaM*eNOS:Hsp90:Akt} - \text{kon4eNOS_H*CN:CaM*Arg:eNOS:Hsp90:Akt} - \text{kon4eNOS_H*CN:CaM*eNOS:Hsp90} - \text{kon4eNOS_H*CN:CaM*Arg:eNOS:Hsp90} + \text{koffCaMeNOS_H*CN:CaM:eNOS:Hsp90:Akt} + \text{koffCaMeNOS_H*Arg:CN:CaM:eNOS:Hsp90:Akt} + \text{koffCaMeNOS_H*CN:CaM:eNOS:Hsp90} + \text{koffCaMeNOS_H*Arg:CN:CaM:eNOS:Hsp90} - \text{kon4peNOS_H*CN:CaM*peNOS:pHsp90} - \text{kon4peNOS_H*CN:CaM*Arg:peNOS:pHsp90} - \text{kon4peNOS*CN:CaM*Akt:eNOS} - \text{kon4peNOS*CN:CaM*Arg:Akt:eNOS} + \text{koffCaMpeNOS*CN:CaM:eNOS:Hsp90:Akt} + \text{koffCaMpeNOS*Arg:CN:CaM:eNOS:Hsp90:Akt} ;$

$d(\text{C:CaM:eNOS})/dt = \text{kon2CeNOS*C:CaM*eNOS} - \text{konCa2N*Ca*Ca*C:CaM:eNOS} - \text{koffCaMeNOS*C:CaM:eNOS} - \text{koneNOSArg*Arg*C:CaM:eNOS} + \text{koffeNOSArg*Arg:C:CaM:eNOS} + \text{kcateNOS*Arg:C:CaM:eNOS} + \text{koffCa2N*CN:CaM:eNOS} - \text{konHsp90_CaMeNOS*C:CaM:eNOS*pHsp90} - \text{konAkteNOS*C:CaM:eNOS*pAkt} + \text{koffHsp90_CaMeNOS*C:CaM:eNOS:pHsp90} + \text{koffAkteNOS*C:CaM:eNOS:pAkt} - \text{konHsp90_CaMeNOS*C:CaM:eNOS*pAkt:pHsp90} - \text{konHsp90_CaMeNOS*C:CaM:eNOS*pAkt:Hsp90} - \text{konHsp90_CaMeNOS*C:CaM:eNOS*Akt:pHsp90} + \text{koffHsp90_CaMeNOS*C:CaM:eNOS:pHsp90:pAkt} + \text{kdpENOS*C:CaM:peNOS} - \text{konHsp90_CaMeNOS*C:CaM:eNOS*Akt:Hsp90} + \text{koffHsp90_CaMeNOS*C:CaM:eNOS:pHsp90:Akt} + \text{koffHsp90_CaMeNOS*C:CaM:eNOS:Hsp90:pAkt} + \text{koffHsp90_CaMeNOS*C:CaM:eNOS:Hsp90:Akt} ;$

$d(\text{Arg:C:CaM:eNOS})/dt = \text{kon2CeNOS*C:CaM*Arg:eNOS} - \text{konCa2N*Ca*Ca*Arg:C:CaM:eNOS} - \text{koffCaMeNOS*Arg:C:CaM:eNOS} + \text{koneNOSArg*Arg*C:CaM:eNOS} - \text{koffeNOSArg*Arg:C:CaM:eNOS} - \text{kcateNOS*Arg:C:CaM:eNOS} + \text{koffCa2N*Arg:CN:CaM:eNOS} - \text{konHsp90_CaMeNOS*Arg:C:CaM:eNOS*pHsp90} - \text{konAkteNOS*Arg:C:CaM:eNOS*pAkt} + \text{koffHsp90_CaMeNOS*Arg:C:CaM:eNOS:pHsp90} + \text{koffAkteNOS*Arg:C:CaM:eNOS:pAkt} - \text{konHsp90_CaMeNOS*Arg:C:CaM:eNOS*pAkt:pHsp90} - \text{konHsp90_CaMeNOS*Arg:C:CaM:eNOS*pAkt:Hsp90} - \text{konHsp90_CaMeNOS*Arg:C:CaM:eNOS*Akt:pHsp90} + \text{koffHsp90_CaMeNOS*Arg:C:CaM:eNOS:pHsp90:pAkt} + \text{kdpENOS*Arg:C:CaM:peNOS} - \text{konHsp90_CaMeNOS*Arg:C:CaM:eNOS*Akt:Hsp90} + \text{koffHsp90_CaMeNOS*Arg:C:CaM:eNOS:pHsp90:Akt} + \text{koffHsp90_CaMeNOS*Arg:C:CaM:eNOS:Hsp90:pAkt} + \text{koffHsp90_CaMeNOS*Arg:C:CaM:eNOS:Hsp90:Akt} ;$

$d(\text{C:CaM:eNOS})/dt = \text{kon2NeNOS*N:CaM*eNOS} - \text{konCa2C*Ca*Ca*C:CaM:eNOS} - \text{koffCaMeNOS*C:CaM:eNOS} - \text{koneNOSArg*Arg*N:CaM:eNOS} + \text{koffeNOSArg*Arg:N:CaM:eNOS} + \text{kcateNOS*Arg:N:CaM:eNOS} + \text{koffCa2C*CN:CaM:eNOS} - \text{konHsp90_CaMeNOS*N:CaM:eNOS*pHsp90} - \text{konAkteNOS*N:CaM:eNOS*pAkt} + \text{koffHsp90_CaMeNOS*N:CaM:eNOS:pHsp90} + \text{koffAkteNOS*N:CaM:eNOS:pAkt} - \text{konHsp90_CaMeNOS*N:CaM:eNOS*pAkt:pHsp90} - \text{konHsp90_CaMeNOS*N:CaM:eNOS*pAkt:Hsp90} - \text{konHsp90_CaMeNOS*N:CaM:eNOS*Akt:pHsp90} + \text{koffHsp90_CaMeNOS*N:CaM:eNOS:pHsp90:pAkt} + \text{kdpENOS*N:CaM:peNOS} - \text{konHsp90_CaMeNOS*N:CaM:eNOS*Akt:Hsp90} +$

$\text{koffHsp90\_CaMeNOS}^*N:\text{CaM:eNOS:pHsp90:Akt} + \text{koffHsp90\_CaMeNOS}^*N:\text{CaM:eNOS:Hsp90:pAkt} +$   
 $\text{koffHsp90\_CaMeNOS}^*N:\text{CaM:eNOS:Hsp90:Akt} ;$

$d(\text{Arg:N:CaM:eNOS})/dt = \text{kon2NeNOS}^*N:\text{CaM}^*\text{Arg:eNOS} - \text{konCa2C}^*\text{Ca}^*\text{Ca}^*\text{Arg:N:CaM:eNOS} -$   
 $\text{koffCaMeNOS}^*\text{Arg:N:CaM:eNOS} + \text{koneNOSArg}^*\text{Arg}^*N:\text{CaM:eNOS} - \text{koffeNOSArg}^*\text{Arg:N:CaM:eNOS} -$   
 $\text{kcateNOS}^*\text{Arg:N:CaM:eNOS} + \text{koffCa2C}^*\text{Arg:CN:CaM:eNOS} - \text{konHsp90\_CaMeNOS}^*\text{Arg:N:CaM:eNOS*pHsp90} -$   
 $\text{konAkteNOS}^*\text{Arg:N:CaM:eNOS*pAkt} + \text{koffHsp90\_CaMeNOS}^*\text{Arg:N:CaM:eNOS:pHsp90} +$   
 $\text{koffAkteNOS}^*\text{Arg:N:CaM:eNOS:pAkt} - \text{konHsp90\_CaMeNOS}^*\text{Arg:N:CaM:eNOS*pAkt:pHsp90} -$   
 $\text{konHsp90\_CaMeNOS}^*\text{Arg:N:CaM:eNOS*pAkt:Hsp90} - \text{konHsp90\_CaMeNOS}^*\text{Arg:N:CaM:eNOS*Akt:pHsp90} +$   
 $\text{koffHsp90\_CaMeNOS}^*\text{Arg:N:CaM:eNOS:pHsp90:pAkt} + \text{kdpeNOS}^*\text{Arg:N:CaM:peNOS} -$   
 $\text{konHsp90\_CaMeNOS}^*\text{Arg:N:CaM:eNOS*Akt:Hsp90} + \text{koffHsp90\_CaMeNOS}^*\text{Arg:N:CaM:eNOS:pHsp90:Akt} +$   
 $\text{koffHsp90\_CaMeNOS}^*\text{Arg:N:CaM:eNOS:Hsp90:pAkt} + \text{koffHsp90\_CaMeNOS}^*\text{Arg:N:CaM:eNOS:Hsp90:Akt} ;$

$d(\text{VEGF:pR2:CD47mem})/dt = \text{konR2CD47}^*\text{VEGF:pR2mem}^*\text{CD47mem} + \text{kpR2}^*\text{VEGF:R2:CD47mem} -$   
 $\text{koffR2CD47}^*\text{VEGF:pR2:CD47mem} - \text{kinterpR2CD47}^*\text{VEGF:pR2:CD47mem} - \text{kdpR2CD47bd}^*\text{VEGF:pR2:CD47mem} ;$

$d(\text{VEGF:pR2cyt})/dt = \text{kinterpR2}^*\text{VEGF:pR2mem} + \text{kpR2}^*\text{VEGF:R2cyt} - \text{kdpR2}^*\text{VEGF:pR2cyt} - \text{kdegR2}^*\text{VEGF:pR2cyt} -$   
 $\text{kdegpR2}^*\text{VEGF:pR2cyt} - \text{konSrcpR2}^*\text{VEGF:pR2cyt}^*\text{Src} - \text{konSrcpR2}^*\text{VEGF:pR2cyt}^*\text{Hsp90:Src} -$   
 $\text{konSrcpR2}^*\text{VEGF:pR2cyt}^*\text{Akt:Src} - \text{konSrcpR2}^*\text{VEGF:pR2cyt}^*\text{Akt:Hsp90:Src} + \text{koffSrcpR2}^*\text{VEGF:pR2cyt:Src} +$   
 $\text{koffSrcpR2}^*\text{VEGF:pR2cyt:Src:Hsp90} + \text{koffSrcpR2}^*\text{VEGF:pR2cyt:Src:Akt} + \text{koffSrcpR2}^*\text{VEGF:pR2cyt:Src:Akt:Hsp90} +$   
 $\text{kpSrc}^*\text{VEGF:pR2cyt:Src} + \text{kpSrc}^*\text{VEGF:pR2cyt:Src:Hsp90} + \text{kpSrc}^*\text{VEGF:pR2cyt:Src:Akt} +$   
 $\text{kpSrc}^*\text{VEGF:pR2cyt:Src:Akt:Hsp90} ;$

$d(\text{VEGF:R2.CD47cyt})/dt = \text{kinterpR2CD47}^*\text{VEGF:R2:CD47mem} - \text{kpR2}^*\text{VEGF:R2.CD47cyt} - \text{kdegCD47}^*\text{VEGF:R2.CD47cyt} +$   
 $\text{kdpR2CD47bd}^*\text{VEGF:pR2:CD47cyt} ;$

$d(\text{pPLCg})/dt = (\text{kpPLCg}/(\text{KM\_PLCgR2}+\text{PLCg}))^*\text{PLCg}^*\text{VEGF:pR2mem} + (\text{kpPLCg}/(\text{KM\_PLCgR2}+\text{PLCg}))^*\text{PLCg}^*\text{VEGF:pR2:CD47mem}$   
 $+ (\text{kpPLCg}/(\text{KM\_PLCgR2}+\text{PLCg}))^*\text{PLCg}^*\text{VEGF:pR2cyt} - \text{kdpPLCg}^*\text{pPLCg} +$   
 $(\text{kpPLCg}/(\text{KM\_PLCgR2}+\text{PLCg}))^*\text{PLCg}^*\text{VEGF:pR2:CD47cyt} + (\text{kpPLCg}/(\text{KM\_PLCgR2}+\text{PLCg}))^*\text{PLCg}^*\text{VEGF:pR2cyt:Src} +$   
 $(\text{kpPLCg}/(\text{KM\_PLCgR2}+\text{PLCg}))^*\text{PLCg}^*\text{VEGF:pR2cyt:Src:Hsp90} +$   
 $(\text{kpPLCg}/(\text{KM\_PLCgR2}+\text{PLCg}))^*\text{PLCg}^*\text{VEGF:pR2cyt:Src:Akt} +$   
 $(\text{kpPLCg}/(\text{KM\_PLCgR2}+\text{PLCg}))^*\text{PLCg}^*\text{VEGF:pR2cyt:Src:Akt:Hsp90} +$   
 $(\text{kpPLCg}/(\text{KM\_PLCgR2}+\text{PLCg}))^*\text{PLCg}^*\text{VEGF:pR2cyt:CD47:Src} +$   
 $(\text{kpPLCg}/(\text{KM\_PLCgR2}+\text{PLCg}))^*\text{PLCg}^*\text{VEGF:pR2cyt:CD47:Src:Hsp90} +$   
 $(\text{kpPLCg}/(\text{KM\_PLCgR2}+\text{PLCg}))^*\text{PLCg}^*\text{VEGF:pR2cyt:CD47:Src:Akt} +$   
 $(\text{kpPLCg}/(\text{KM\_PLCgR2}+\text{PLCg}))^*\text{PLCg}^*\text{VEGF:pR2cyt:CD47:Src:Akt:Hsp90} ;$

$d(\text{CN:CaM:eNOS})/dt = \text{konCa2C}^*\text{Ca}^*\text{Ca}^*\text{C:CaM:eNOS} + \text{konCa2N}^*\text{Ca}^*\text{Ca}^*\text{C:CaM:eNOS} + \text{kon4eNOS}^*\text{CN:CaM}^*\text{eNOS} -$   
 $\text{koffCa2C}^*\text{CN:CaM:eNOS} - \text{koffCa2N}^*\text{CN:CaM:eNOS} - \text{koffCaMeNOS}^*\text{CN:CaM:eNOS} -$   
 $\text{koneNOSArg}^*\text{Arg}^*\text{CN:CaM:eNOS} + \text{koffeNOSArg}^*\text{Arg:CN:CaM:eNOS} + \text{kcateNOS}^*\text{Arg:CN:CaM:eNOS} -$   
 $\text{konHsp90\_CaMeNOS}^*\text{CN:CaM:eNOS*pHsp90} - \text{konAkteNOS}^*\text{CN:CaM:eNOS*pAkt} +$   
 $\text{koffHsp90\_CaMeNOS}^*\text{CN:CaM:eNOS:pHsp90} + \text{koffAkteNOS}^*\text{CN:CaM:eNOS:pAkt} -$   
 $\text{konHsp90\_CaMeNOS}^*\text{CN:CaM:eNOS*pAkt:pHsp90} - \text{konHsp90\_CaMeNOS}^*\text{CN:CaM:eNOS*pAkt:Hsp90} -$   
 $\text{konHsp90\_CaMeNOS}^*\text{CN:CaM:eNOS*Akt:pHsp90} + \text{koffHsp90\_CaMeNOS}^*\text{CN:CaM:eNOS:pHsp90:pAkt} +$   
 $\text{kdpeNOS}^*\text{CN:CaM:peNOS} - \text{konHsp90\_CaMeNOS}^*\text{CN:CaM:eNOS*Akt:Hsp90} +$   
 $\text{koffHsp90\_CaMeNOS}^*\text{CN:CaM:eNOS:pHsp90:Akt} + \text{koffHsp90\_CaMeNOS}^*\text{CN:CaM:eNOS:Hsp90:pAkt} +$   
 $\text{koffHsp90\_CaMeNOS}^*\text{CN:CaM:eNOS:Hsp90:Akt} ;$

$d(\text{Arg:CN:CaM:eNOS})/dt = \text{konCa2C}^*\text{Ca}^*\text{Ca}^*\text{Arg:N:CaM:eNOS} + \text{konCa2N}^*\text{Ca}^*\text{Ca}^*\text{Arg:C:CaM:eNOS} +$   
 $\text{kon4eNOS}^*\text{CN:CaM}^*\text{Arg:eNOS} - \text{koffCa2C}^*\text{Arg:CN:CaM:eNOS} - \text{koffCa2N}^*\text{Arg:CN:CaM:eNOS} -$   
 $\text{koffCaMeNOS}^*\text{Arg:CN:CaM:eNOS} + \text{koneNOSArg}^*\text{Arg}^*\text{CN:CaM:eNOS} - \text{koffeNOSArg}^*\text{Arg:CN:CaM:eNOS} -$   
 $\text{kcateNOS}^*\text{Arg:CN:CaM:eNOS} - \text{konHsp90\_CaMeNOS}^*\text{Arg:CN:CaM:eNOS*pHsp90} -$   
 $\text{konAkteNOS}^*\text{Arg:CN:CaM:eNOS*pAkt} + \text{koffHsp90\_CaMeNOS}^*\text{Arg:CN:CaM:eNOS:pHsp90} +$   
 $\text{koffAkteNOS}^*\text{Arg:CN:CaM:eNOS:pAkt} - \text{konHsp90\_CaMeNOS}^*\text{Arg:CN:CaM:eNOS*pAkt:pHsp90} -$   
 $\text{konHsp90\_CaMeNOS}^*\text{Arg:CN:CaM:eNOS*pAkt:Hsp90} - \text{konHsp90\_CaMeNOS}^*\text{Arg:CN:CaM:eNOS*Akt:pHsp90}$   
 $+ \text{koffHsp90\_CaMeNOS}^*\text{Arg:CN:CaM:eNOS:pHsp90:pAkt} + \text{kdpeNOS}^*\text{Arg:CN:CaM:peNOS} -$   
 $\text{konHsp90\_CaMeNOS}^*\text{Arg:CN:CaM:eNOS*Akt:Hsp90} + \text{koffHsp90\_CaMeNOS}^*\text{Arg:CN:CaM:eNOS:pHsp90:Akt} +$   
 $\text{koffHsp90\_CaMeNOS}^*\text{Arg:CN:CaM:eNOS:Hsp90:pAkt} + \text{koffHsp90\_CaMeNOS}^*\text{Arg:CN:CaM:eNOS:Hsp90:Akt} ;$

$d(\text{NO})/dt = \text{kcateNOS}^*\text{Arg:C:CaM:eNOS} + \text{kcateNOS}^*\text{Arg:N:CaM:eNOS} + \text{kcateNOS}^*\text{Arg:CN:CaM:eNOS} -$   
 $\text{konNOsGC}^*\text{sGC\_b}^*\text{NO} - \text{kf\_GC\_NO}^*\text{sGC}^*\text{NO} - \text{kclearNO}^*\text{NO} + \text{koffNOsGC}^*\text{sGC\_6c} - \text{kr\_NOGC\_NO}^*\text{sGC:NO}^*\text{NO} +$   
 $\text{kr\_GC\_NO}^*\text{sGC:NO} - \text{konNO\_NOGC}^*\text{sGC\_5c}^*\text{NO} + \text{koffNO\_NOGC}^*\text{sGC\_5c:NO} + \text{kf\_NOGC\_NO}^*\text{sGC\_5c:NO} +$

$\text{kateNOS*Arg:C:CaM:eNOS:pAkt} + \text{kateNOS*Arg:N:CaM:eNOS:pAkt} + \text{kateNOS*Arg:CN:CaM:eNOS:pAkt} +$   
 $\text{kateNOS\_H*Arg:C:CaM:eNOS:pHsp90} + \text{kateNOS\_H*Arg:N:CaM:eNOS:pHsp90} +$   
 $\text{kateNOS\_H*Arg:CN:CaM:eNOS:pHsp90} + \text{katepeNOS*Arg:C:CaM:peNOS} + \text{katepeNOS*Arg:N:CaM:peNOS} +$   
 $\text{katepeNOS*Arg:CN:CaM:peNOS} + \text{kateNOS\_H*Arg:C:CaM:eNOS:pHsp90:pAkt} +$   
 $\text{kateNOS\_H*Arg:N:CaM:eNOS:pHsp90:pAkt} + \text{kateNOS\_H*Arg:CN:CaM:eNOS:pHsp90:pAkt} +$   
 $\text{katepeNOS*Arg:peNOS} + \text{kateNOS\_H*Arg:C:CaM:eNOS:pHsp90:Akt} + \text{kateNOS\_H*Arg:N:CaM:eNOS:pHsp90:Akt} +$   
 $\text{kateNOS\_H*Arg:CN:CaM:eNOS:pHsp90:Akt} + \text{kateNOS\_H*Arg:C:CaM:eNOS:Hsp90:pAkt} +$   
 $\text{kateNOS\_H*Arg:N:CaM:eNOS:Hsp90:pAkt} + \text{kateNOS\_H*Arg:CN:CaM:eNOS:Hsp90:pAkt} +$   
 $\text{katepeNOS\_H*Arg:C:CaM:peNOS:pHsp90} + \text{katepeNOS\_H*Arg:N:CaM:peNOS:pHsp90} +$   
 $\text{katepeNOS\_H*Arg:CN:CaM:peNOS:pHsp90} + \text{kateNOS*Arg:C:CaM:eNOS:Akt} + \text{kateNOS*Arg:N:CaM:eNOS:Akt} +$   
 $\text{kateNOS*Arg:CN:CaM:eNOS:Hsp90:Akt} + \text{kateNOS\_H*Arg:C:CaM:eNOS:Hsp90:Akt} +$   
 $\text{kateNOS\_H*Arg:N:CaM:eNOS:Hsp90:Akt} + \text{kateNOS\_H*Arg:CN:CaM:eNOS:Hsp90:Akt} +$   
 $\text{kateNOS\_H*Arg:C:CaM:eNOS:Hsp90} + \text{kateNOS\_H*Arg:N:CaM:eNOS:Hsp90} +$   
 $\text{kateNOS\_H*Arg:CN:CaM:eNOS:Hsp90} + \text{katepeNOS\_H*Arg:peNOS:pHsp90} ;$

$d(\text{Cit})/dt = \text{kateNOS*Arg:C:CaM:eNOS} + \text{kateNOS*Arg:N:CaM:eNOS} + \text{kateNOS*Arg:CN:CaM:eNOS} +$   
 $\text{kateNOS*Arg:C:CaM:eNOS:pAkt} + \text{kateNOS*Arg:N:CaM:eNOS:pAkt} + \text{kateNOS*Arg:CN:CaM:eNOS:pAkt} +$   
 $\text{kateNOS\_H*Arg:C:CaM:eNOS:pHsp90} + \text{kateNOS\_H*Arg:N:CaM:eNOS:pHsp90} +$   
 $\text{kateNOS\_H*Arg:CN:CaM:eNOS:pHsp90} + \text{katepeNOS*Arg:C:CaM:peNOS} + \text{katepeNOS*Arg:N:CaM:peNOS} +$   
 $\text{katepeNOS*Arg:CN:CaM:peNOS} + \text{kateNOS\_H*Arg:C:CaM:eNOS:pHsp90:pAkt} +$   
 $\text{kateNOS\_H*Arg:N:CaM:eNOS:pHsp90:pAkt} + \text{kateNOS\_H*Arg:CN:CaM:eNOS:pHsp90:pAkt} +$   
 $\text{katepeNOS*Arg:peNOS} + \text{kateNOS\_H*Arg:C:CaM:eNOS:pHsp90:Akt} + \text{kateNOS\_H*Arg:N:CaM:eNOS:pHsp90:Akt} +$   
 $\text{kateNOS\_H*Arg:CN:CaM:eNOS:pHsp90:Akt} + \text{kateNOS\_H*Arg:C:CaM:eNOS:Hsp90:pAkt} +$   
 $\text{kateNOS\_H*Arg:N:CaM:eNOS:Hsp90:pAkt} + \text{kateNOS\_H*Arg:CN:CaM:eNOS:Hsp90:pAkt} +$   
 $\text{katepeNOS\_H*Arg:C:CaM:peNOS:pHsp90} + \text{katepeNOS\_H*Arg:N:CaM:peNOS:pHsp90} +$   
 $\text{katepeNOS\_H*Arg:CN:CaM:peNOS:pHsp90} + \text{kateNOS*Arg:C:CaM:eNOS:Akt} + \text{kateNOS*Arg:N:CaM:eNOS:Akt} +$   
 $\text{kateNOS*Arg:CN:CaM:eNOS:Hsp90:Akt} + \text{kateNOS\_H*Arg:C:CaM:eNOS:Hsp90:Akt} +$   
 $\text{kateNOS\_H*Arg:N:CaM:eNOS:Hsp90:Akt} + \text{kateNOS\_H*Arg:CN:CaM:eNOS:Hsp90:Akt} +$   
 $\text{kateNOS\_H*Arg:C:CaM:eNOS:Hsp90} + \text{kateNOS\_H*Arg:N:CaM:eNOS:Hsp90} +$   
 $\text{kateNOS\_H*Arg:CN:CaM:eNOS:Hsp90} + \text{katepeNOS\_H*Arg:peNOS:pHsp90} ;$

$d(\text{VEGF:pR2:CD47cyt})/dt = \text{kinterpR2CD47*VEGF:pR2:CD47mem} + \text{kpR2*VEGF:R2.CD47cyt} - \text{kdpR2CD47bd*VEGF:pR2:CD47cyt}$   
 $- \text{kdegpR2CD47*VEGF:pR2:CD47cyt} - \text{konSrcpR2*VEGF:pR2:CD47cyt*Src} - \text{konSrcpR2*VEGF:pR2:CD47cyt*Hsp90:Src}$   
 $- \text{konSrcpR2*VEGF:pR2:CD47cyt*Akt:Src} - \text{konSrcpR2*VEGF:pR2:CD47cyt*Akt:Hsp90:Src} +$   
 $\text{koffSrcpR2*VEGF:pR2cyt:CD47:Src} + \text{koffSrcpR2*VEGF:pR2cyt:CD47:Src:Hsp90} +$   
 $\text{koffSrcpR2*VEGF:pR2cyt:CD47:Src:Akt} + \text{koffSrcpR2*VEGF:pR2cyt:CD47:Src:Akt:Hsp90} +$   
 $\text{kpSrc*VEGF:pR2cyt:CD47:Src} + \text{kpSrc*VEGF:pR2cyt:CD47:Src:Hsp90} + \text{kpSrc*VEGF:pR2cyt:CD47:Src:Akt} +$   
 $\text{kpSrc*VEGF:pR2cyt:CD47:Src:Akt:Hsp90} ;$

$d(\text{VEGF:pR2cyt:Src})/dt = \text{konSrcpR2*VEGF:pR2cyt*Src} - \text{koffSrcpR2*VEGF:pR2cyt:Src} - \text{kpSrc*VEGF:pR2cyt:Src} ;$

$d(\text{VEGF:pR2cyt:Src:Hsp90})/dt = \text{konSrcpR2*VEGF:pR2cyt*Hsp90:Src} - \text{koffSrcpR2*VEGF:pR2cyt:Src:Hsp90} -$   
 $\text{kpSrc*VEGF:pR2cyt:Src:Hsp90} ;$

$d(\text{VEGF:pR2cyt:Src:Akt})/dt = \text{konSrcpR2*VEGF:pR2cyt*Akt:Src} - \text{koffSrcpR2*VEGF:pR2cyt:Src:Akt} - \text{kpSrc*VEGF:pR2cyt:Src:Akt} ;$

$d(\text{VEGF:pR2cyt:Src:Akt:Hsp90})/dt = \text{konSrcpR2*VEGF:pR2cyt*Akt:Hsp90:Src} - \text{koffSrcpR2*VEGF:pR2cyt:Src:Akt:Hsp90} -$   
 $\text{kpSrc*VEGF:pR2cyt:Src:Akt:Hsp90} ;$

$d(\text{IP3})/dt = \text{RF2(parameters,observables)*pPLCg*PIP2} - \text{kdegIP3*IP3} ;$

$d(\text{sGC}_6\text{c})/dt = \text{konNOSGC*sGC}_b\text{NO} - \text{koffNOSGC*sGC}_6\text{c} - \text{ka}_\text{sGC*sGC}_6\text{c} + \text{kd}_\text{sGC*sGC}_5\text{c} ;$

$d(\text{sGC:NO})/dt = \text{kf}_\text{GC}_\text{NO*sGC*NO} - \text{kr}_\text{NOGC}_\text{NO*sGC:NO*NO} - \text{kr}_\text{GC}_\text{NO*sGC:NO} + \text{kf}_\text{NOGC}_\text{NO*sGC}_5\text{c:NO} ;$

$d(\text{VEGF:pR2cyt:CD47:Src})/dt = \text{konSrcpR2*VEGF:pR2:CD47cyt*Src} - \text{koffSrcpR2*VEGF:pR2cyt:CD47:Src} -$   
 $\text{kpSrc*VEGF:pR2cyt:CD47:Src} ;$

$d(\text{VEGF:pR2cyt:CD47:Src:Hsp90})/dt = \text{konSrcpR2*VEGF:pR2:CD47cyt*Hsp90:Src} - \text{koffSrcpR2*VEGF:pR2cyt:CD47:Src:Hsp90} -$   
 $\text{kpSrc*VEGF:pR2cyt:CD47:Src:Hsp90} ;$

$d(\text{VEGF:pR2cyt:CD47:Src:Akt})/dt = \text{konSrcpR2*VEGF:pR2:CD47cyt*Akt:Src} - \text{koffSrcpR2*VEGF:pR2cyt:CD47:Src:Akt} -$   
 $\text{kpSrc*VEGF:pR2cyt:CD47:Src:Akt} ;$

$$\begin{aligned}
d(\text{VEGF:pR2cyt:CD47:Src:Akt:Hsp90})/dt &= \text{konSrcpR2*VEGF:pR2:CD47cyt*Akt:Hsp90:Src} - \\
&\quad \text{koffSrcpR2*VEGF:pR2cyt:CD47:Src:Akt:Hsp90} - \text{kpSrc*VEGF:pR2cyt:CD47:Src:Akt:Hsp90} ; \\
d(\text{pSrc})/dt &= \text{kpSrc*VEGF:pR2cyt:Src} + \text{kpSrc*VEGF:pR2cyt:CD47:Src} - \text{kdpSrc*pSrc} - \text{konSrcHsp90*pSrc*Hsp90} + \\
&\quad \text{koffSrcHsp90*pSrc:Hsp90} + \text{kpHsp90*pSrc:Hsp90} - \text{konSrcAkt*pSrc*Akt} + \text{koffSrcAkt*pSrc:Akt} + \text{kpAkt*pSrc:Akt} ; \\
d(\text{pSrc:Hsp90})/dt &= \text{kpSrc*VEGF:pR2cyt:Src:Hsp90} + \text{kpSrc*VEGF:pR2cyt:CD47:Src:Hsp90} - \text{kdpSrc*pSrc:Hsp90} + \\
&\quad \text{konSrcHsp90*pSrc*Hsp90} - \text{koffSrcHsp90*pSrc:Hsp90} - \text{kpHsp90*pSrc:Hsp90} ; \\
d(\text{pSrc:Akt})/dt &= \text{kpSrc*VEGF:pR2cyt:Src:Akt} + \text{kpSrc*VEGF:pR2cyt:CD47:Src:Akt} - \text{kdpSrc*pSrc:Akt} - \\
&\quad \text{konSrcHsp90*pSrc:Akt*Hsp90} + \text{koffSrcHsp90*pSrc:Hsp90:Akt} + \text{kpHsp90*pSrc:Hsp90:Akt} + \text{konSrcAkt*pSrc*Akt} - \\
&\quad \text{koffSrcAkt*pSrc:Akt} - \text{kpAkt*pSrc:Akt} ; \\
d(\text{pSrc:Hsp90:Akt})/dt &= \text{kpSrc*VEGF:pR2cyt:Src:Akt:Hsp90} + \text{kpSrc*VEGF:pR2cyt:CD47:Src:Akt:Hsp90} - \text{kdpSrc*pSrc:Hsp90:Akt} \\
&\quad + \text{konSrcHsp90*pSrc:Akt*Hsp90} - \text{koffSrcHsp90*pSrc:Hsp90:Akt} - \text{kpHsp90*pSrc:Hsp90:Akt} ; \\
d(\text{sGC}_5\text{c})/dt &= \text{ka\_sGC*sGC}_6\text{c} - \text{kd\_sGC*sGC}_5\text{c} - \text{konNO\_NOGC*sGC}_5\text{c*NO} + \text{koffNO\_NOGC*sGC}_5\text{c:NO} ; \\
d(\text{sGC}_5\text{c:NO})/dt &= \text{kr\_NOGC\_NO*sGC:NO*NO} + \text{konNO\_NOGC*sGC}_5\text{c*NO} - \text{koffNO\_NOGC*sGC}_5\text{c:NO} - \\
&\quad \text{kf\_NOGC\_NO*sGC}_5\text{c:NO} ; \\
d(\text{pHsp90})/dt &= \text{kpHsp90*pSrc:Hsp90} + \text{kpHsp90*pSrc:Hsp90:Akt} - \text{kdpHsp90*pHsp90} - \text{konHsp90eNOS*eNOS*pHsp90} - \\
&\quad \text{konHsp90eNOS*Arg:eNOS*pHsp90} - \text{konHsp90\_CaMeNOS*C:CaM:eNOS*pHsp90} - \\
&\quad \text{konHsp90\_CaMeNOS*Arg:C:CaM:eNOS*pHsp90} - \text{konHsp90\_CaMeNOS*N:CaM:eNOS*pHsp90} - \\
&\quad \text{konHsp90\_CaMeNOS*Arg:N:CaM:eNOS*pHsp90} - \text{konHsp90\_CaMeNOS*CN:CaM:eNOS*pHsp90} - \\
&\quad \text{konHsp90\_CaMeNOS*Arg:CN:CaM:eNOS*pHsp90} - \text{konpAktHsp90*pAkt*pHsp90} + \text{koffHsp90eNOS*eNOS:pHsp90} + \\
&\quad \text{koffHsp90eNOS*Arg:eNOS:pHsp90} + \text{koffHsp90\_CaMeNOS*C:CaM:eNOS:pHsp90} + \\
&\quad \text{koffHsp90\_CaMeNOS*Arg:C:CaM:eNOS:pHsp90} + \text{koffHsp90\_CaMeNOS*N:CaM:eNOS:pHsp90} + \\
&\quad \text{koffHsp90\_CaMeNOS*Arg:N:CaM:eNOS:pHsp90} + \text{koffHsp90\_CaMeNOS*CN:CaM:eNOS:pHsp90} + \\
&\quad \text{koffHsp90\_CaMeNOS*Arg:CN:CaM:eNOS:pHsp90} + \text{koffpAktHsp90*pAkt:pHsp90} - \\
&\quad \text{konHsp90eNOS*eNOS:pAkt*pHsp90} - \text{konHsp90eNOS*Arg:eNOS:pAkt*pHsp90} - \\
&\quad \text{konHsp90\_CaMeNOS*C:CaM:eNOS:pAkt*pHsp90} - \text{konHsp90\_CaMeNOS*Arg:C:CaM:eNOS:pAkt*pHsp90} - \\
&\quad \text{konHsp90\_CaMeNOS*N:CaM:eNOS:pAkt*pHsp90} - \text{konHsp90\_CaMeNOS*Arg:N:CaM:eNOS:pAkt*pHsp90} - \\
&\quad \text{konHsp90\_CaMeNOS*CN:CaM:eNOS:pAkt*pHsp90} - \text{konHsp90\_CaMeNOS*Arg:CN:CaM:eNOS:pAkt*pHsp90} - \\
&\quad \text{konHsp90\_CaMeNOS*C:CaM:peNOS*pHsp90} - \text{konHsp90\_CaMeNOS*Arg:C:CaM:peNOS*pHsp90} - \\
&\quad \text{konHsp90\_CaMeNOS*N:CaM:peNOS*pHsp90} - \text{konHsp90\_CaMeNOS*Arg:N:CaM:peNOS*pHsp90} - \\
&\quad \text{konHsp90\_CaMeNOS*CN:CaM:peNOS*pHsp90} - \text{konHsp90\_CaMeNOS*Arg:CN:CaM:peNOS*pHsp90} + \\
&\quad \text{koffHsp90eNOS*eNOS:pHsp90:pAkt} + \text{koffHsp90eNOS*Arg:eNOS:pHsp90:pAkt} + \\
&\quad \text{koffHsp90\_CaMeNOS*C:CaM:eNOS:pHsp90:pAkt} + \text{koffHsp90\_CaMeNOS*Arg:C:CaM:eNOS:pHsp90:pAkt} + \\
&\quad \text{koffHsp90\_CaMeNOS*N:CaM:eNOS:pHsp90:pAkt} + \text{koffHsp90\_CaMeNOS*Arg:N:CaM:eNOS:pHsp90:pAkt} + \\
&\quad \text{koffHsp90\_CaMeNOS*CN:CaM:eNOS:pHsp90:pAkt} + \text{koffHsp90\_CaMeNOS*Arg:CN:CaM:eNOS:pHsp90:pAkt} - \\
&\quad \text{konHsp90eNOS*peNOS*pHsp90} - \text{konHsp90eNOS*Arg:peNOS*pHsp90} + \\
&\quad \text{koffHsp90\_CaMeNOS*C:CaM:peNOS:pHsp90} + \text{koffHsp90\_CaMeNOS*Arg:C:CaM:peNOS:pHsp90} + \\
&\quad \text{koffHsp90\_CaMeNOS*N:CaM:peNOS:pHsp90} + \text{koffHsp90\_CaMeNOS*N:CaM:peNOS:pHsp90} + \\
&\quad \text{koffHsp90\_CaMeNOS*CN:CaM:peNOS:pHsp90} + \text{koffHsp90\_CaMeNOS*Arg:CN:CaM:peNOS:pHsp90} + \\
&\quad \text{koffHsp90eNOS*eNOS:pHsp90:Akt} + \text{koffHsp90eNOS*Arg:eNOS:pHsp90:Akt} + \\
&\quad \text{koffHsp90\_CaMeNOS*C:CaM:eNOS:pHsp90:Akt} + \text{koffHsp90\_CaMeNOS*Arg:C:CaM:eNOS:pHsp90:Akt} + \\
&\quad \text{koffHsp90\_CaMeNOS*N:CaM:eNOS:pHsp90:Akt} + \text{koffHsp90\_CaMeNOS*Arg:N:CaM:eNOS:pHsp90:Akt} + \\
&\quad \text{koffHsp90\_CaMeNOS*CN:CaM:eNOS:pHsp90:Akt} + \text{koffHsp90\_CaMeNOS*Arg:CN:CaM:eNOS:pHsp90:Akt} + \\
&\quad \text{koffHsp90eNOS*peNOS:pHsp90} + \text{koffHsp90eNOS*Arg:peNOS:pHsp90} - \text{konHsp90eNOS*Akt:eNOS*pHsp90} - \\
&\quad \text{konHsp90eNOS*Arg:Akt:eNOS*pHsp90} - \text{konHsp90\_CaMeNOS*C:CaM:eNOS:Akt*pHsp90} - \\
&\quad \text{konHsp90\_CaMeNOS*Arg:C:CaM:eNOS:Akt*pHsp90} - \text{konHsp90\_CaMeNOS*N:CaM:eNOS:Akt*pHsp90} - \\
&\quad \text{konHsp90\_CaMeNOS*Arg:N:CaM:eNOS:Akt*pHsp90} - \text{konHsp90\_CaMeNOS*CN:CaM:eNOS:Hsp90:Akt*pHsp90} - \\
&\quad \text{konHsp90\_CaMeNOS*Arg:CN:CaM:eNOS:Hsp90:Akt*pHsp90} ; \\
d(\text{pAkt})/dt &= \text{kpAkt*pSrc:Akt} - \text{kdpAkt*pAkt} - \text{konAkteNOS*eNOS*pAkt} - \text{konAkteNOS*Arg:eNOS*pAkt} - \\
&\quad \text{konAkteNOS*C:CaM:eNOS*pAkt} - \text{konAkteNOS*Arg:C:CaM:eNOS*pAkt} - \text{konAkteNOS*N:CaM:eNOS*pAkt} - \\
&\quad \text{konAkteNOS*Arg:N:CaM:eNOS*pAkt} - \text{konAkteNOS*CN:CaM:eNOS*pAkt} - \text{konAkteNOS*Arg:CN:CaM:eNOS*pAkt} - \\
&\quad \text{konpAktHsp90*pAkt*pHsp90} + \text{koffAkteNOS*eNOS:pAkt} + \text{koffAkteNOS*Arg:eNOS:pAkt} + \\
&\quad \text{koffAkteNOS*C:CaM:eNOS:pAkt} + \text{koffAkteNOS*Arg:C:CaM:eNOS:pAkt} + \text{koffAkteNOS*N:CaM:eNOS:pAkt} + \\
&\quad \text{koffAkteNOS*Arg:N:CaM:eNOS:pAkt} + \text{koffAkteNOS*CN:CaM:eNOS:pAkt} + \text{koffAkteNOS*Arg:CN:CaM:eNOS:pAkt} + \\
&\quad \text{koffpAktHsp90*pAkt:pHsp90} - \text{konpAktHsp90*eNOS:pHsp90*pAkt} - \text{konpAktHsp90*Arg:eNOS:pHsp90*pAkt} -
\end{aligned}$$

$\text{konpAktHsp90}^*\text{C:CaM:eNOS:pHsp90}^*\text{pAkt} - \text{konpAktHsp90}^*\text{Arg:C:CaM:eNOS:pHsp90}^*\text{pAkt} -$   
 $\text{konpAktHsp90}^*\text{N:CaM:eNOS:pHsp90}^*\text{pAkt} - \text{konpAktHsp90}^*\text{Arg:N:CaM:eNOS:pHsp90}^*\text{pAkt} -$   
 $\text{konpAktHsp90}^*\text{CN:CaM:eNOS:pHsp90}^*\text{pAkt} - \text{konpAktHsp90}^*\text{Arg:CN:CaM:eNOS:pHsp90}^*\text{pAkt} +$   
 $\text{kcatpAkt}^*\text{C:CaM:eNOS:pAkt} + \text{kcatpAkt}^*\text{Arg:C:CaM:eNOS:pAkt} + \text{kcatpAkt}^*\text{N:CaM:eNOS:pAkt} +$   
 $\text{kcatpAkt}^*\text{Arg:N:CaM:eNOS:pAkt} + \text{kcatpAkt}^*\text{CN:CaM:eNOS:pAkt} + \text{kcatpAkt}^*\text{Arg:CN:CaM:eNOS:pAkt} +$   
 $\text{koffpAktHsp90}^*\text{eNOS:pHsp90:pAkt} + \text{koffpAktHsp90}^*\text{Arg:eNOS:pHsp90:pAkt} +$   
 $\text{koffpAktHsp90}^*\text{C:CaM:eNOS:pHsp90:pAkt} + \text{koffpAktHsp90}^*\text{Arg:C:CaM:eNOS:pHsp90:pAkt} +$   
 $\text{koffpAktHsp90}^*\text{N:CaM:eNOS:pHsp90:pAkt} + \text{koffpAktHsp90}^*\text{Arg:N:CaM:eNOS:pHsp90:pAkt} +$   
 $\text{koffpAktHsp90}^*\text{CN:CaM:eNOS:pHsp90:pAkt} + \text{koffpAktHsp90}^*\text{Arg:CN:CaM:eNOS:pHsp90:pAkt} +$   
 $\text{kcatpAkt}_\text{H}^*\text{C:CaM:eNOS:pHsp90:pAkt} + \text{kcatpAkt}_\text{H}^*\text{Arg:C:CaM:eNOS:pHsp90:pAkt} +$   
 $\text{kcatpAkt}_\text{H}^*\text{N:CaM:eNOS:pHsp90:pAkt} + \text{kcatpAkt}_\text{H}^*\text{Arg:N:CaM:eNOS:pHsp90:pAkt} +$   
 $\text{kcatpAkt}_\text{H}^*\text{CN:CaM:eNOS:pHsp90:pAkt} + \text{kcatpAkt}_\text{H}^*\text{Arg:CN:CaM:eNOS:pHsp90:pAkt} +$   
 $\text{koffpAktHsp90}^*\text{eNOS:Hsp90:pAkt} + \text{koffpAktHsp90}^*\text{Arg:eNOS:Hsp90:pAkt} +$   
 $\text{koffpAktHsp90}^*\text{C:CaM:eNOS:Hsp90:pAkt} + \text{koffpAktHsp90}^*\text{Arg:C:CaM:eNOS:Hsp90:pAkt} +$   
 $\text{koffpAktHsp90}^*\text{N:CaM:eNOS:Hsp90:pAkt} + \text{koffpAktHsp90}^*\text{Arg:N:CaM:eNOS:Hsp90:pAkt} +$   
 $\text{koffpAktHsp90}^*\text{CN:CaM:eNOS:Hsp90:pAkt} + \text{koffpAktHsp90}^*\text{Arg:CN:CaM:eNOS:Hsp90:pAkt} -$   
 $\text{konpAktHsp90}^*\text{eNOS:Hsp90}^*\text{pAkt} - \text{konpAktHsp90}^*\text{Arg:eNOS:Hsp90}^*\text{pAkt} -$   
 $\text{konpAktHsp90}^*\text{C:CaM:eNOS:Hsp90}^*\text{pAkt} - \text{konpAktHsp90}^*\text{Arg:C:CaM:eNOS:Hsp90}^*\text{pAkt} -$   
 $\text{konpAktHsp90}^*\text{N:CaM:eNOS:Hsp90}^*\text{pAkt} - \text{konpAktHsp90}^*\text{Arg:N:CaM:eNOS:Hsp90}^*\text{pAkt} -$   
 $\text{konpAktHsp90}^*\text{CN:CaM:eNOS:Hsp90}^*\text{pAkt} - \text{konpAktHsp90}^*\text{Arg:CN:CaM:eNOS:Hsp90}^*\text{pAkt} ;$

$d(\text{cGMP})/dt = \text{kcatSGC}^*\text{GTP}^*\text{SGC\_5c} - \text{koncGMPPDE}^*\text{cGMP}^*\text{PDE} -$   
 $(((((\text{kcatPDE}^*0.05)^*(\text{PDE}+\text{cGMP:PDE}))/(\text{KM\_PDE}+\text{cGMP}))+((\text{kcatPDE}^*\text{cGMP:PDE\_a})/(\text{KM\_PDE}+\text{cGMP}))))^*\text{cGMP} +$   
 $\text{koffcGMPPDE}^*\text{cGMP:PDE} ;$

$d(\text{eNOS:pHsp90})/dt = \text{konHsp90eNOS}^*\text{eNOS}^*\text{pHsp90} - \text{kon2CeNOS\_H}^*\text{C:CaM}^*\text{eNOS:pHsp90} +$   
 $\text{koffCaMeNOS\_H}^*\text{C:CaM:eNOS:pHsp90} - \text{kon2NeNOS\_H}^*\text{N:CaM}^*\text{eNOS:pHsp90} +$   
 $\text{koffCaMeNOS\_H}^*\text{N:CaM:eNOS:pHsp90} - \text{kon4eNOS\_H}^*\text{CN:CaM}^*\text{eNOS:pHsp90} +$   
 $\text{koffCaMeNOS\_H}^*\text{CN:CaM:eNOS:pHsp90} - \text{koffHsp90eNOS}^*\text{eNOS:pHsp90} - \text{konpAktHsp90}^*\text{eNOS:pHsp90}^*\text{pAkt} -$   
 $\text{konbeNOSArg}^*\text{Arg}^*\text{eNOS:pHsp90} + \text{koffbeNOSArg}^*\text{Arg:eNOS:pHsp90} + \text{koffpAktHsp90}^*\text{eNOS:pHsp90:pAkt} +$   
 $\text{kdpENOS}^*\text{peNOS:pHsp90} ;$

$d(\text{Arg:eNOS:pHsp90})/dt = \text{konHsp90eNOS}^*\text{Arg:eNOS}^*\text{pHsp90} - \text{kon2CeNOS\_H}^*\text{C:CaM}^*\text{Arg:eNOS:pHsp90} +$   
 $\text{koffCaMeNOS\_H}^*\text{Arg:C:CaM:eNOS:pHsp90} - \text{kon2NeNOS\_H}^*\text{N:CaM}^*\text{Arg:eNOS:pHsp90} +$   
 $\text{koffCaMeNOS\_H}^*\text{Arg:N:CaM:eNOS:pHsp90} - \text{kon4eNOS\_H}^*\text{CN:CaM}^*\text{Arg:eNOS:pHsp90} +$   
 $\text{koffCaMeNOS\_H}^*\text{Arg:CN:CaM:eNOS:pHsp90} - \text{koffHsp90eNOS}^*\text{Arg:eNOS:pHsp90} -$   
 $\text{konpAktHsp90}^*\text{Arg:eNOS:pHsp90}^*\text{pAkt} + \text{konbeNOSArg}^*\text{Arg}^*\text{eNOS:pHsp90} - \text{koffbeNOSArg}^*\text{Arg:eNOS:pHsp90} +$   
 $\text{koffpAktHsp90}^*\text{Arg:eNOS:pHsp90:pAkt} + \text{kdpENOS}^*\text{Arg:peNOS:pHsp90} ;$

$d(\text{C:CaM:eNOS:pHsp90})/dt = \text{konHsp90\_CaMeNOS}^*\text{C:CaM:eNOS}^*\text{pHsp90} - \text{konCa2N}^*\text{Ca}^*\text{Ca}^*\text{C:CaM:eNOS:pHsp90} +$   
 $\text{koffCa2N}^*\text{CN:CaM:eNOS:pHsp90} + \text{kon2CeNOS\_H}^*\text{C:CaM}^*\text{eNOS:pHsp90} - \text{koffCaMeNOS\_H}^*\text{C:CaM:eNOS:pHsp90} -$   
 $\text{koffHsp90\_CaMeNOS}^*\text{C:CaM:eNOS:pHsp90} - \text{konpAktHsp90}^*\text{C:CaM:eNOS:pHsp90}^*\text{pAkt} -$   
 $\text{koneNOSArg\_H}^*\text{Arg}^*\text{C:CaM:eNOS:pHsp90} + \text{koffeNOSArg\_H}^*\text{Arg:C:CaM:eNOS:pHsp90} +$   
 $\text{kcateNOS\_H}^*\text{Arg:C:CaM:eNOS:pHsp90} + \text{koffpAktHsp90}^*\text{C:CaM:eNOS:pHsp90:pAkt} +$   
 $\text{kdpENOS}^*\text{C:CaM:peNOS:pHsp90} ;$

$d(\text{Arg:C:CaM:eNOS:pHsp90})/dt = \text{konHsp90\_CaMeNOS}^*\text{Arg:C:CaM:eNOS}^*\text{pHsp90} - \text{konCa2N}^*\text{Ca}^*\text{Ca}^*\text{Arg:C:CaM:eNOS:pHsp90}$   
 $+ \text{koffCa2N}^*\text{Arg:CN:CaM:eNOS:pHsp90} + \text{kon2CeNOS\_H}^*\text{C:CaM}^*\text{Arg:eNOS:pHsp90} -$   
 $\text{koffCaMeNOS\_H}^*\text{Arg:C:CaM:eNOS:pHsp90} - \text{koffHsp90\_CaMeNOS}^*\text{Arg:C:CaM:eNOS:pHsp90} -$   
 $\text{konpAktHsp90}^*\text{Arg:C:CaM:eNOS:pHsp90}^*\text{pAkt} + \text{koneNOSArg\_H}^*\text{Arg}^*\text{C:CaM:eNOS:pHsp90} -$   
 $\text{koffeNOSArg\_H}^*\text{Arg:C:CaM:eNOS:pHsp90} - \text{kcateNOS\_H}^*\text{Arg:C:CaM:eNOS:pHsp90} +$   
 $\text{koffpAktHsp90}^*\text{Arg:C:CaM:eNOS:pHsp90:pAkt} + \text{kdpENOS}^*\text{Arg:C:CaM:peNOS:pHsp90} ;$

$d(\text{N:CaM:eNOS:pHsp90})/dt = \text{konHsp90\_CaMeNOS}^*\text{N:CaM:eNOS}^*\text{pHsp90} - \text{konCa2C}^*\text{Ca}^*\text{Ca}^*\text{N:CaM:eNOS:pHsp90} +$   
 $\text{koffCa2C}^*\text{CN:CaM:eNOS:pHsp90} + \text{kon2NeNOS\_H}^*\text{N:CaM}^*\text{eNOS:pHsp90} - \text{koffCaMeNOS\_H}^*\text{N:CaM:eNOS:pHsp90} -$   
 $\text{koffHsp90\_CaMeNOS}^*\text{N:CaM:eNOS:pHsp90} - \text{konpAktHsp90}^*\text{N:CaM:eNOS:pHsp90}^*\text{pAkt} -$   
 $\text{koneNOSArg\_H}^*\text{Arg}^*\text{N:CaM:eNOS:pHsp90} + \text{koffeNOSArg\_H}^*\text{Arg:N:CaM:eNOS:pHsp90} +$   
 $\text{kcateNOS\_H}^*\text{Arg:N:CaM:eNOS:pHsp90} + \text{koffpAktHsp90}^*\text{N:CaM:eNOS:pHsp90:pAkt} +$   
 $\text{kdpENOS}^*\text{N:CaM:peNOS:pHsp90} ;$

$d(\text{Arg:N:CaM:eNOS:pHsp90})/dt = \text{konHsp90\_CaMeNOS}^*\text{Arg:N:CaM:eNOS}^*\text{pHsp90} -$   
 $\text{konCa2C}^*\text{Ca}^*\text{Ca}^*\text{Arg:N:CaM:eNOS:pHsp90} + \text{koffCa2C}^*\text{Arg:CN:CaM:eNOS:pHsp90} +$

$$\begin{aligned}
& \text{kon2NeNOS\_H}^*\text{N:CaM}^*\text{Arg:eNOS:pHsp90} - \text{koffCaMeNOS\_H}^*\text{Arg:N:CaM:eNOS:pHsp90} - \\
& \text{koffHsp90\_CaMeNOS}^*\text{Arg:N:CaM:eNOS:pHsp90} - \text{konpAktHsp90}^*\text{Arg:N:CaM:eNOS:pHsp90*pAkt} + \\
& \text{koneNOSArg\_H}^*\text{Arg}^*\text{N:CaM:eNOS:pHsp90} - \text{koffeNOSArg\_H}^*\text{Arg:N:CaM:eNOS:pHsp90} - \\
& \text{kcateNOS\_H}^*\text{Arg:N:CaM:eNOS:pHsp90} + \text{koffpAktHsp90}^*\text{Arg:N:CaM:eNOS:pHsp90:pAkt} + \\
& \text{kdpeNOS}^*\text{Arg:N:CaM:peNOS:pHsp90} ; \\
\\
& d(\text{CN:CaM:eNOS:pHsp90})/dt = \text{konHsp90\_CaMeNOS}^*\text{CN:CaM:eNOS*pHsp90} + \text{konCa2C}^*\text{Ca}^*\text{Ca}^*\text{N:CaM:eNOS:pHsp90} - \\
& \text{koffCa2C}^*\text{CN:CaM:eNOS:pHsp90} + \text{konCa2N}^*\text{Ca}^*\text{Ca}^*\text{C:CaM:eNOS:pHsp90} - \text{koffCa2N}^*\text{CN:CaM:eNOS:pHsp90} + \\
& \text{kon4eNOS\_H}^*\text{CN:CaM}^*\text{eNOS:pHsp90} - \text{koffCaMeNOS\_H}^*\text{CN:CaM:eNOS:pHsp90} - \\
& \text{koffHsp90\_CaMeNOS}^*\text{CN:CaM:eNOS:pHsp90} - \text{konpAktHsp90}^*\text{CN:CaM:eNOS:pHsp90*pAkt} - \\
& \text{koneNOSArg\_H}^*\text{Arg}^*\text{CN:CaM:eNOS:pHsp90} + \text{koffeNOSArg\_H}^*\text{Arg:CN:CaM:eNOS:pHsp90} + \\
& \text{kcateNOS\_H}^*\text{Arg:CN:CaM:eNOS:pHsp90} + \text{koffpAktHsp90}^*\text{CN:CaM:eNOS:pHsp90:pAkt} + \\
& \text{kdpeNOS}^*\text{CN:CaM:peNOS:pHsp90} ; \\
\\
& d(\text{Arg:CN:CaM:eNOS:pHsp90})/dt = \text{konHsp90\_CaMeNOS}^*\text{Arg:CN:CaM:eNOS*pHsp90} + \\
& \text{konCa2C}^*\text{Ca}^*\text{Ca}^*\text{Arg:N:CaM:eNOS:pHsp90} - \text{koffCa2C}^*\text{Arg:CN:CaM:eNOS:pHsp90} + \\
& \text{konCa2N}^*\text{Ca}^*\text{Ca}^*\text{Arg:C:CaM:eNOS:pHsp90} - \text{koffCa2N}^*\text{Arg:CN:CaM:eNOS:pHsp90} + \\
& \text{kon4eNOS\_H}^*\text{CN:CaM}^*\text{Arg:eNOS:pHsp90} - \text{koffCaMeNOS\_H}^*\text{Arg:CN:CaM:eNOS:pHsp90} - \\
& \text{koffHsp90\_CaMeNOS}^*\text{Arg:CN:CaM:eNOS:pHsp90} - \text{konpAktHsp90}^*\text{Arg:CN:CaM:eNOS:pHsp90*pAkt} + \\
& \text{koneNOSArg\_H}^*\text{Arg}^*\text{CN:CaM:eNOS:pHsp90} - \text{koffeNOSArg\_H}^*\text{Arg:CN:CaM:eNOS:pHsp90} - \\
& \text{kcateNOS\_H}^*\text{Arg:CN:CaM:eNOS:pHsp90} + \text{koffpAktHsp90}^*\text{Arg:CN:CaM:eNOS:pHsp90:pAkt} + \\
& \text{kdpeNOS}^*\text{Arg:CN:CaM:peNOS:pHsp90} ; \\
\\
& d(\text{eNOS:pAkt})/dt = \text{konAkteNOS}^*\text{eNOS*pAkt} - \text{kon2CpeNOS}^*\text{C:CaM}^*\text{eNOS:pAkt} + \text{koffCaMpeNOS}^*\text{C:CaM:eNOS:pAkt} - \\
& \text{kon2NpeNOS}^*\text{N:CaM}^*\text{eNOS:pAkt} + \text{koffCaMpeNOS}^*\text{N:CaM:eNOS:pAkt} - \text{kon4peNOS}^*\text{CN:CaM}^*\text{eNOS:pAkt} + \\
& \text{koffCaMpeNOS}^*\text{CN:CaM:eNOS:pAkt} - \text{koffAkteNOS}^*\text{eNOS:pAkt} - \text{konHsp90eNOS}^*\text{eNOS:pAkt*pHsp90} - \\
& \text{konbeNOSArg}^*\text{Arg}^*\text{eNOS:pAkt} + \text{koffbeNOSArg}^*\text{Arg:eNOS:pAkt} + \text{koffHsp90eNOS}^*\text{eNOS:pHsp90:pAkt} ; \\
\\
& d(\text{Arg:eNOS:pAkt})/dt = \text{konAkteNOS}^*\text{Arg:eNOS*pAkt} - \text{kon2CpeNOS}^*\text{C:CaM}^*\text{Arg:eNOS:pAkt} + \\
& \text{koffCaMpeNOS}^*\text{Arg:C:CaM:eNOS:pAkt} - \text{kon2NpeNOS}^*\text{N:CaM}^*\text{Arg:eNOS:pAkt} + \\
& \text{koffCaMpeNOS}^*\text{Arg:N:CaM:eNOS:pAkt} - \text{kon4peNOS}^*\text{CN:CaM}^*\text{Arg:eNOS:pAkt} + \\
& \text{koffCaMpeNOS}^*\text{Arg:CN:CaM:eNOS:pAkt} - \text{koffAkteNOS}^*\text{Arg:eNOS:pAkt} - \text{konHsp90eNOS}^*\text{Arg:eNOS:pAkt*pHsp90} + \\
& \text{konbeNOSArg}^*\text{Arg}^*\text{eNOS:pAkt} - \text{koffbeNOSArg}^*\text{Arg:eNOS:pAkt} + \text{koffHsp90eNOS}^*\text{Arg:eNOS:pHsp90:pAkt} ; \\
\\
& d(\text{C:CaM:eNOS:pAkt})/dt = \text{konAkteNOS}^*\text{C:CaM:eNOS*pAkt} - \text{konCa2N}^*\text{Ca}^*\text{Ca}^*\text{C:CaM:eNOS:pAkt} + \\
& \text{koffCa2N}^*\text{CN:CaM:eNOS:pAkt} + \text{kon2CpeNOS}^*\text{C:CaM}^*\text{eNOS:pAkt} - \text{koffCaMpeNOS}^*\text{C:CaM:eNOS:pAkt} - \\
& \text{koffAkteNOS}^*\text{C:CaM:eNOS:pAkt} - \text{konHsp90\_CaMeNOS}^*\text{C:CaM:eNOS:pAkt*pHsp90} - \text{kcatpAkt}^*\text{C:CaM:eNOS:pAkt} - \\
& \text{koneNOSArg}^*\text{Arg}^*\text{C:CaM:eNOS:pAkt} + \text{koffeNOSArg}^*\text{Arg:C:CaM:eNOS:pAkt} + \text{kcateNOS}^*\text{Arg:C:CaM:eNOS:pAkt} + \\
& \text{koffHsp90\_CaMeNOS}^*\text{C:CaM:eNOS:pHsp90:pAkt} ; \\
\\
& d(\text{Arg:C:CaM:eNOS:pAkt})/dt = \text{konAkteNOS}^*\text{Arg:C:CaM:eNOS*pAkt} - \text{konCa2N}^*\text{Ca}^*\text{Ca}^*\text{Arg:C:CaM:eNOS:pAkt} + \\
& \text{koffCa2N}^*\text{Arg:CN:CaM:eNOS:pAkt} + \text{kon2CpeNOS}^*\text{C:CaM}^*\text{Arg:eNOS:pAkt} - \text{koffCaMpeNOS}^*\text{Arg:C:CaM:eNOS:pAkt} - \\
& \text{koffAkteNOS}^*\text{Arg:C:CaM:eNOS:pAkt} - \text{konHsp90\_CaMeNOS}^*\text{Arg:C:CaM:eNOS:pAkt*pHsp90} - \\
& \text{kcatpAkt}^*\text{Arg:C:CaM:eNOS:pAkt} + \text{koneNOSArg}^*\text{Arg}^*\text{C:CaM:eNOS:pAkt} - \text{koffeNOSArg}^*\text{Arg:C:CaM:eNOS:pAkt} - \\
& \text{kcateNOS}^*\text{Arg:C:CaM:eNOS:pAkt} + \text{koffHsp90\_CaMeNOS}^*\text{Arg:C:CaM:eNOS:pHsp90:pAkt} ; \\
\\
& d(\text{N:CaM:eNOS:pAkt})/dt = \text{konAkteNOS}^*\text{N:CaM:eNOS*pAkt} - \text{konCa2C}^*\text{Ca}^*\text{Ca}^*\text{N:CaM:eNOS:pAkt} + \\
& \text{koffCa2C}^*\text{CN:CaM:eNOS:pAkt} + \text{kon2NpeNOS}^*\text{N:CaM}^*\text{eNOS:pAkt} - \text{koffCaMpeNOS}^*\text{N:CaM:eNOS:pAkt} - \\
& \text{koffAkteNOS}^*\text{N:CaM:eNOS:pAkt} - \text{konHsp90\_CaMeNOS}^*\text{N:CaM:eNOS:pAkt*pHsp90} - \text{kcatpAkt}^*\text{N:CaM:eNOS:pAkt} - \\
& \text{koneNOSArg}^*\text{Arg}^*\text{N:CaM:eNOS:pAkt} + \text{koffeNOSArg}^*\text{Arg:N:CaM:eNOS:pAkt} + \text{kcateNOS}^*\text{Arg:N:CaM:eNOS:pAkt} + \\
& \text{koffHsp90\_CaMeNOS}^*\text{N:CaM:eNOS:pHsp90:pAkt} ; \\
\\
& d(\text{Arg:N:CaM:eNOS:pAkt})/dt = \text{konAkteNOS}^*\text{Arg:N:CaM:eNOS*pAkt} - \text{konCa2C}^*\text{Ca}^*\text{Ca}^*\text{Arg:N:CaM:eNOS:pAkt} + \\
& \text{koffCa2C}^*\text{Arg:CN:CaM:eNOS:pAkt} + \text{kon2NpeNOS}^*\text{N:CaM}^*\text{Arg:eNOS:pAkt} - \text{koffCaMpeNOS}^*\text{Arg:N:CaM:eNOS:pAkt} - \\
& \text{koffAkteNOS}^*\text{Arg:N:CaM:eNOS:pAkt} - \text{konHsp90\_CaMeNOS}^*\text{Arg:N:CaM:eNOS:pAkt*pHsp90} - \\
& \text{kcatpAkt}^*\text{Arg:N:CaM:eNOS:pAkt} + \text{koneNOSArg}^*\text{Arg}^*\text{N:CaM:eNOS:pAkt} - \text{koffeNOSArg}^*\text{Arg:N:CaM:eNOS:pAkt} - \\
& \text{kcateNOS}^*\text{Arg:N:CaM:eNOS:pAkt} + \text{koffHsp90\_CaMeNOS}^*\text{Arg:N:CaM:eNOS:pHsp90:pAkt} ; \\
\\
& d(\text{CN:CaM:eNOS:pAkt})/dt = \text{konAkteNOS}^*\text{CN:CaM:eNOS*pAkt} + \text{konCa2C}^*\text{Ca}^*\text{Ca}^*\text{N:CaM:eNOS:pAkt} - \\
& \text{koffCa2C}^*\text{CN:CaM:eNOS:pAkt} + \text{konCa2N}^*\text{Ca}^*\text{Ca}^*\text{C:CaM:eNOS:pAkt} - \text{koffCa2N}^*\text{CN:CaM:eNOS:pAkt} + \\
& \text{kon4peNOS}^*\text{CN:CaM}^*\text{eNOS:pAkt} - \text{koffCaMpeNOS}^*\text{CN:CaM:eNOS:pAkt} - \text{koffAkteNOS}^*\text{CN:CaM:eNOS:pAkt} - \\
& \text{konHsp90\_CaMeNOS}^*\text{CN:CaM:eNOS:pAkt*pHsp90} - \text{kcatpAkt}^*\text{CN:CaM:eNOS:pAkt} -
\end{aligned}$$

$$\text{koneNOSArg*Arg*CN:CaM:eNOS:pAkt} + \text{koffeNOSArg*Arg:CN:CaM:eNOS:pAkt} + \text{kcateNOS*Arg:CN:CaM:eNOS:pAkt} + \text{koffHsp90\_CaMeNOS*CN:CaM:eNOS:pHsp90:pAkt} ;$$

$$\begin{aligned} d(\text{Arg:CN:CaM:eNOS:pAkt})/dt = & \text{konAkteNOS*Arg:CN:CaM:eNOS*pAkt} + \text{konCa2C*Ca*Ca*Arg:N:CaM:eNOS:pAkt} - \\ & \text{koffCa2C*Arg:CN:CaM:eNOS:pAkt} + \text{konCa2N*Ca*Ca*Arg:C:CaM:eNOS:pAkt} - \text{koffCa2N*Arg:CN:CaM:eNOS:pAkt} + \\ & \text{kon4peNOS*CN:CaM*Arg:eNOS:pAkt} - \text{koffCaMpeNOS*Arg:CN:CaM:eNOS:pAkt} - \\ & \text{koffAkteNOS*Arg:CN:CaM:eNOS:pAkt} - \text{konHsp90\_CaMeNOS*Arg:CN:CaM:eNOS:pAkt*pHsp90} - \\ & \text{kcatpAkt*Arg:CN:CaM:eNOS:pAkt} + \text{koneNOSArg*Arg*CN:CaM:eNOS:pAkt} - \text{koffeNOSArg*Arg:CN:CaM:eNOS:pAkt} - \\ & \text{kcateNOS*Arg:CN:CaM:eNOS:pAkt} + \text{koffHsp90\_CaMeNOS*Arg:CN:CaM:eNOS:pHsp90:pAkt} ; \end{aligned}$$

$$\begin{aligned} d(\text{pAkt:pHsp90})/dt = & \text{konpAktHsp90*pAkt*pHsp90} - \text{kdpHsp90*pAkt:pHsp90} - \text{kdpAkt*pAkt:pHsp90} - \\ & \text{koffpAktHsp90*pAkt:pHsp90} - \text{konHsp90eNOS*eNOS*pAkt:pHsp90} - \text{konHsp90eNOS*Arg:eNOS*pAkt:pHsp90} - \\ & \text{konHsp90\_CaMeNOS*C:CaM:eNOS*pAkt:pHsp90} - \text{konHsp90\_CaMeNOS*Arg:C:CaM:eNOS*pAkt:pHsp90} - \\ & \text{konHsp90\_CaMeNOS*N:CaM:eNOS*pAkt:pHsp90} - \text{konHsp90\_CaMeNOS*Arg:N:CaM:eNOS*pAkt:pHsp90} - \\ & \text{konHsp90\_CaMeNOS*CN:CaM:eNOS*pAkt:pHsp90} - \text{konHsp90\_CaMeNOS*Arg:CN:CaM:eNOS*pAkt:pHsp90} + \\ & \text{koffHsp90eNOS*eNOS:pHsp90:pAkt} + \text{koffHsp90eNOS*Arg:eNOS:pHsp90:pAkt} + \\ & \text{koffHsp90\_CaMeNOS*C:CaM:eNOS:pHsp90:pAkt} + \text{koffHsp90\_CaMeNOS*Arg:C:CaM:eNOS:pHsp90:pAkt} + \\ & \text{koffHsp90\_CaMeNOS*N:CaM:eNOS:pHsp90:pAkt} + \text{koffHsp90\_CaMeNOS*Arg:N:CaM:eNOS:pHsp90:pAkt} + \\ & \text{koffHsp90\_CaMeNOS*CN:CaM:eNOS:pHsp90:pAkt} + \text{koffHsp90\_CaMeNOS*Arg:CN:CaM:eNOS:pHsp90:pAkt} ; \end{aligned}$$

$$d(\text{cGMP:PDE})/dt = \text{koncGMPPDE*cGMP*PDE} - \text{koffcGMPPDE*cGMP:PDE} - \text{ka\_PDE*cGMP:PDE} + \text{kd\_PDE*cGMP:PDE\_a} ;$$

$$d(\text{GMP})/dt = (((\text{kcatPDE}*0.05)*(\text{PDE}+\text{cGMP:PDE}))/(\text{KM\_PDE}+\text{cGMP})) + ((\text{kcatPDE*cGMP:PDE\_a})/(\text{KM\_PDE}+\text{cGMP})))*\text{cGMP} ;$$

$$\begin{aligned} d(\text{pAkt:Hsp90})/dt = & \text{kdpHsp90*pAkt:pHsp90} - \text{kdpAkt*pAkt:Hsp90} - \text{konHsp90eNOS*eNOS*pAkt:Hsp90} - \\ & \text{konHsp90eNOS*Arg:eNOS*pAkt:Hsp90} - \text{konHsp90\_CaMeNOS*C:CaM:eNOS*pAkt:Hsp90} - \\ & \text{konHsp90\_CaMeNOS*Arg:C:CaM:eNOS*pAkt:Hsp90} - \text{konHsp90\_CaMeNOS*N:CaM:eNOS*pAkt:Hsp90} - \\ & \text{konHsp90\_CaMeNOS*Arg:N:CaM:eNOS*pAkt:Hsp90} - \text{konHsp90\_CaMeNOS*CN:CaM:eNOS*pAkt:Hsp90} - \\ & \text{konHsp90\_CaMeNOS*Arg:CN:CaM:eNOS*pAkt:Hsp90} + \text{koffHsp90eNOS*eNOS:Hsp90:pAkt} + \\ & \text{koffHsp90eNOS*Arg:eNOS:Hsp90:pAkt} + \text{koffHsp90\_CaMeNOS*C:CaM:eNOS:Hsp90:pAkt} + \\ & \text{koffHsp90\_CaMeNOS*Arg:C:CaM:eNOS:Hsp90:pAkt} + \text{koffHsp90\_CaMeNOS*N:CaM:eNOS:Hsp90:pAkt} + \\ & \text{koffHsp90\_CaMeNOS*Arg:N:CaM:eNOS:Hsp90:pAkt} + \text{koffHsp90\_CaMeNOS*CN:CaM:eNOS:Hsp90:pAkt} + \\ & \text{koffHsp90\_CaMeNOS*Arg:CN:CaM:eNOS:Hsp90:pAkt} ; \end{aligned}$$

$$\begin{aligned} d(\text{Akt:pHsp90})/dt = & \text{kdpAkt*pAkt:pHsp90} - \text{kdpHsp90*Akt:pHsp90} - \text{konHsp90eNOS*eNOS*Akt:pHsp90} - \\ & \text{konHsp90eNOS*Arg:eNOS*Akt:pHsp90} - \text{konHsp90\_CaMeNOS*C:CaM:eNOS*Akt:pHsp90} - \\ & \text{konHsp90\_CaMeNOS*Arg:C:CaM:eNOS*Akt:pHsp90} - \text{konHsp90\_CaMeNOS*N:CaM:eNOS*Akt:pHsp90} - \\ & \text{konHsp90\_CaMeNOS*Arg:N:CaM:eNOS*Akt:pHsp90} - \text{konHsp90\_CaMeNOS*CN:CaM:eNOS*Akt:pHsp90} - \\ & \text{konHsp90\_CaMeNOS*Arg:CN:CaM:eNOS*Akt:pHsp90} + \text{koffHsp90eNOS*eNOS:pHsp90:Akt} + \\ & \text{koffHsp90eNOS*Arg:eNOS:pHsp90:Akt} + \text{koffHsp90\_CaMeNOS*C:CaM:eNOS:pHsp90:Akt} + \\ & \text{koffHsp90\_CaMeNOS*Arg:C:CaM:eNOS:pHsp90:Akt} + \text{koffHsp90\_CaMeNOS*N:CaM:eNOS:pHsp90:Akt} + \\ & \text{koffHsp90\_CaMeNOS*Arg:N:CaM:eNOS:pHsp90:Akt} + \text{koffHsp90\_CaMeNOS*CN:CaM:eNOS:pHsp90:Akt} + \\ & \text{koffHsp90\_CaMeNOS*Arg:CN:CaM:eNOS:pHsp90:Akt} ; \end{aligned}$$

$$\begin{aligned} d(\text{eNOS:pHsp90:pAkt})/dt = & \text{konHsp90eNOS*eNOS*pAkt:pHsp90} + \text{konpAktHsp90*eNOS:pHsp90*pAkt} + \\ & \text{konHsp90eNOS*eNOS:pAkt*pHsp90} - \text{kdpAkt*eNOS:pHsp90:pAkt} - \text{kon2CeNOS\_H*C:CaM*eNOS:pHsp90:pAkt} + \\ & \text{koffCaMeNOS\_H*C:CaM:eNOS:pHsp90:pAkt} - \text{kon2NeNOS\_H*N:CaM*eNOS:pHsp90:pAkt} + \\ & \text{kon2NeNOS\_H*N:CaM*Arg:eNOS:pHsp90:pAkt} - \text{kon4eNOS\_H*CN:CaM*eNOS:pHsp90:pAkt} + \\ & \text{koffCaMeNOS\_H*CN:CaM:eNOS:pHsp90:pAkt} - \text{kon2CpeNOS\_H*C:CaM*eNOS:pHsp90:pAkt} + \\ & \text{koffCaMpeNOS\_H*C:CaM:eNOS:pHsp90:pAkt} - \text{kon2NpeNOS\_H*N:CaM*eNOS:pHsp90:pAkt} + \\ & \text{koffCaMpeNOS\_H*N:CaM:eNOS:pHsp90:pAkt} - \text{kon4peNOS\_H*CN:CaM*eNOS:pHsp90:pAkt} + \\ & \text{koffCaMpeNOS\_H*CN:CaM:eNOS:pHsp90:pAkt} - \text{koffHsp90eNOS*eNOS:pHsp90:pAkt} - \\ & \text{koffpAktHsp90*eNOS:pHsp90:pAkt} - \text{koffHsp90eNOS*eNOS:pHsp90:pAkt} - \text{konbeNOSArg*Arg*eNOS:pHsp90:pAkt} + \\ & \text{koffbeNOSArg*Arg:eNOS:pHsp90:pAkt} ; \end{aligned}$$

$$\begin{aligned} d(\text{Arg:eNOS:pHsp90:pAkt})/dt = & \text{konHsp90eNOS*Arg:eNOS*pAkt:pHsp90} + \text{konpAktHsp90*Arg:eNOS:pHsp90*pAkt} + \\ & \text{konHsp90eNOS*Arg:eNOS:pAkt*pHsp90} - \text{kdpAkt*Arg:eNOS:pHsp90:pAkt} - \\ & \text{kon2CeNOS\_H*C:CaM*Arg:eNOS:pHsp90:pAkt} + \text{koffCaMeNOS\_H*Arg:C:CaM:eNOS:pHsp90:pAkt} - \\ & \text{kon2NeNOS\_H*N:CaM*Arg:eNOS:pHsp90:pAkt} + \text{koffCaMeNOS\_H*Arg:N:CaM:eNOS:pHsp90:pAkt} - \\ & \text{kon4eNOS\_H*CN:CaM*Arg:eNOS:pHsp90:pAkt} + \text{koffCaMeNOS\_H*Arg:CN:CaM:eNOS:pHsp90:pAkt} - \\ & \text{kon2CpeNOS\_H*C:CaM*Arg:eNOS:pHsp90:pAkt} + \text{koffCaMpeNOS\_H*Arg:C:CaM:eNOS:pHsp90:pAkt} - \\ & \text{kon2NpeNOS\_H*N:CaM*Arg:eNOS:pHsp90:pAkt} + \text{koffCaMpeNOS\_H*Arg:N:CaM:eNOS:pHsp90:pAkt} - \end{aligned}$$

$$\begin{aligned}
& \text{kon4peNOS\_H*CN:CaM*Arg:eNOS:pHsp90:pAkt} + \text{koffCaMpeNOS\_H*Arg:CN:CaM:eNOS:pHsp90:pAkt} - \\
& \text{koffHsp90eNOS*Arg:eNOS:pHsp90:pAkt} - \text{koffpAktHsp90*Arg:eNOS:pHsp90:pAkt} - \\
& \text{koffHsp90eNOS*Arg:eNOS:pHsp90:pAkt} + \text{konbeNOSArg*Arg*eNOS:pHsp90:pAkt} - \\
& \text{koffbeNOSArg*Arg:eNOS:pHsp90:pAkt}; \\
d(\text{C:CaM:eNOS:pHsp90:pAkt})/dt = & \text{konpAktHsp90*C:CaM:eNOS:pHsp90*pAkt} + \\
& \text{konHsp90\_CaMeNOS*C:CaM:eNOS:pAkt*pHsp90} + \text{konHsp90\_CaMeNOS*C:CaM:eNOS*pAkt:pHsp90} - \\
& \text{kdpAkt*C:CaM:eNOS:pHsp90:pAkt} - \text{konCa2N*Ca*Ca*C:CaM:eNOS:pHsp90:pAkt} + \\
& \text{koffCa2N*CN:CaM:eNOS:pHsp90:pAkt} + \text{kon2CeNOS\_H*C:CaM*eNOS:pHsp90:pAkt} - \\
& \text{koffCaMeNOS\_H*C:CaM:eNOS:pHsp90:pAkt} + \text{kon2CpeNOS\_H*C:CaM*eNOS:pHsp90:pAkt} - \\
& \text{koffCaMpeNOS\_H*C:CaM:eNOS:pHsp90:pAkt} - \text{koffpAktHsp90*C:CaM:eNOS:pHsp90:pAkt} - \\
& \text{koffHsp90\_CaMeNOS*C:CaM:eNOS:pHsp90:pAkt} - \text{koffHsp90\_CaMeNOS*C:CaM:eNOS:pHsp90:pAkt} - \\
& \text{kcatpAkt\_H*C:CaM:eNOS:pHsp90:pAkt} - \text{koneNOSArg\_H*Arg*C:CaM:eNOS:pHsp90:pAkt} + \\
& \text{koffeNOSArg\_H*Arg:C:CaM:eNOS:pHsp90:pAkt} + \text{kcateNOS\_H*Arg:C:CaM:eNOS:pHsp90:pAkt}; \\
d(\text{Arg:C:CaM:eNOS:pHsp90:pAkt})/dt = & \text{konpAktHsp90*Arg:C:CaM:eNOS:pHsp90*pAkt} + \\
& \text{konHsp90\_CaMeNOS*Arg:C:CaM:eNOS:pAkt*pHsp90} + \text{konHsp90\_CaMeNOS*Arg:C:CaM:eNOS*pAkt:pHsp90} - \\
& \text{kdpAkt*Arg:C:CaM:eNOS:pHsp90:pAkt} - \text{konCa2N*Ca*Ca*Arg:C:CaM:eNOS:pHsp90:pAkt} + \\
& \text{koffCa2N*Arg:CN:CaM:eNOS:pHsp90:pAkt} + \text{kon2CeNOS\_H*C:CaM*Arg:eNOS:pHsp90:pAkt} - \\
& \text{koffCaMeNOS\_H*Arg:C:CaM:eNOS:pHsp90:pAkt} + \text{kon2CpeNOS\_H*C:CaM*Arg:eNOS:pHsp90:pAkt} - \\
& \text{koffCaMpeNOS\_H*Arg:C:CaM:eNOS:pHsp90:pAkt} - \text{koffpAktHsp90*Arg:C:CaM:eNOS:pHsp90:pAkt} - \\
& \text{koffHsp90\_CaMeNOS*Arg:C:CaM:eNOS:pHsp90:pAkt} - \text{koffHsp90\_CaMeNOS*Arg:C:CaM:eNOS:pHsp90:pAkt} - \\
& \text{kcatpAkt\_H*Arg:C:CaM:eNOS:pHsp90:pAkt} + \text{koneNOSArg\_H*Arg*C:CaM:eNOS:pHsp90:pAkt} - \\
& \text{koffeNOSArg\_H*Arg:C:CaM:eNOS:pHsp90:pAkt} - \text{kcateNOS\_H*Arg:C:CaM:eNOS:pHsp90:pAkt}; \\
d(\text{N:CaM:eNOS:pHsp90:pAkt})/dt = & \text{konpAktHsp90*N:CaM:eNOS:pHsp90*pAkt} + \\
& \text{konHsp90\_CaMeNOS*N:CaM:eNOS:pAkt*pHsp90} + \text{konHsp90\_CaMeNOS*N:CaM:eNOS*pAkt:pHsp90} - \\
& \text{kdpAkt*N:CaM:eNOS:pHsp90:pAkt} - \text{konCa2C*Ca*Ca*N:CaM:eNOS:pHsp90:pAkt} + \\
& \text{koffCa2C*CN:CaM:eNOS:pHsp90:pAkt} + \text{kon2NeNOS\_H*N:CaM*eNOS:pHsp90:pAkt} - \\
& \text{kon2NeNOS\_H*N:CaM*Arg:eNOS:pHsp90:pAkt} + \text{kon2NpeNOS\_H*N:CaM*eNOS:pHsp90:pAkt} - \\
& \text{koffCaMpeNOS\_H*N:CaM:eNOS:pHsp90:pAkt} - \text{koffpAktHsp90*N:CaM:eNOS:pHsp90:pAkt} - \\
& \text{koffHsp90\_CaMeNOS*N:CaM:eNOS:pHsp90:pAkt} - \text{koffHsp90\_CaMeNOS*N:CaM:eNOS:pHsp90:pAkt} - \\
& \text{kcatpAkt\_H*N:CaM:eNOS:pHsp90:pAkt} - \text{koneNOSArg\_H*Arg*N:CaM:eNOS:pHsp90:pAkt} + \\
& \text{koffeNOSArg\_H*Arg:N:CaM:eNOS:pHsp90:pAkt} + \text{kcateNOS\_H*Arg:N:CaM:eNOS:pHsp90:pAkt}; \\
d(\text{Arg:N:CaM:eNOS:pHsp90:pAkt})/dt = & \text{konpAktHsp90*Arg:N:CaM:eNOS:pHsp90*pAkt} + \\
& \text{konHsp90\_CaMeNOS*Arg:N:CaM:eNOS:pAkt*pHsp90} + \text{konHsp90\_CaMeNOS*Arg:N:CaM:eNOS*pAkt:pHsp90} - \\
& \text{kdpAkt*Arg:N:CaM:eNOS:pHsp90:pAkt} - \text{konCa2C*Ca*Ca*Arg:N:CaM:eNOS:pHsp90:pAkt} + \\
& \text{koffCa2C*Arg:CN:CaM:eNOS:pHsp90:pAkt} + \text{kon2NeNOS\_H*N:CaM*Arg:eNOS:pHsp90:pAkt} - \\
& \text{koffCaMeNOS\_H*Arg:N:CaM:eNOS:pHsp90:pAkt} + \text{kon2NpeNOS\_H*N:CaM*Arg:eNOS:pHsp90:pAkt} - \\
& \text{koffCaMpeNOS\_H*Arg:N:CaM:eNOS:pHsp90:pAkt} - \text{koffpAktHsp90*Arg:N:CaM:eNOS:pHsp90:pAkt} - \\
& \text{koffHsp90\_CaMeNOS*Arg:N:CaM:eNOS:pHsp90:pAkt} - \text{koffHsp90\_CaMeNOS*Arg:N:CaM:eNOS:pHsp90:pAkt} - \\
& \text{kcatpAkt\_H*Arg:N:CaM:eNOS:pHsp90:pAkt} + \text{koneNOSArg\_H*Arg*N:CaM:eNOS:pHsp90:pAkt} - \\
& \text{koffeNOSArg\_H*Arg:N:CaM:eNOS:pHsp90:pAkt} - \text{kcateNOS\_H*Arg:N:CaM:eNOS:pHsp90:pAkt}; \\
d(\text{CN:CaM:eNOS:pHsp90:pAkt})/dt = & \text{konpAktHsp90*CN:CaM:eNOS:pHsp90*pAkt} + \\
& \text{konHsp90\_CaMeNOS*CN:CaM:eNOS:pAkt*pHsp90} + \text{konHsp90\_CaMeNOS*CN:CaM:eNOS*pAkt:pHsp90} - \\
& \text{kdpAkt*CN:CaM:eNOS:pHsp90:pAkt} + \text{konCa2C*Ca*Ca*N:CaM:eNOS:pHsp90:pAkt} - \\
& \text{koffCa2C*CN:CaM:eNOS:pHsp90:pAkt} + \text{konCa2N*Ca*Ca*C:CaM:eNOS:pHsp90:pAkt} - \\
& \text{koffCa2N*CN:CaM:eNOS:pHsp90:pAkt} + \text{kon4eNOS\_H*CN:CaM*eNOS:pHsp90:pAkt} - \\
& \text{koffCaMeNOS\_H*CN:CaM:eNOS:pHsp90:pAkt} + \text{kon4peNOS\_H*CN:CaM*eNOS:pHsp90:pAkt} - \\
& \text{koffCaMpeNOS\_H*CN:CaM:eNOS:pHsp90:pAkt} - \text{koffpAktHsp90*CN:CaM:eNOS:pHsp90:pAkt} - \\
& \text{koffHsp90\_CaMeNOS*CN:CaM:eNOS:pHsp90:pAkt} - \text{koffHsp90\_CaMeNOS*CN:CaM:eNOS:pHsp90:pAkt} - \\
& \text{kcatpAkt\_H*CN:CaM:eNOS:pHsp90:pAkt} - \text{koneNOSArg\_H*Arg*CN:CaM:eNOS:pHsp90:pAkt} + \\
& \text{koffeNOSArg\_H*Arg:CN:CaM:eNOS:pHsp90:pAkt} + \text{kcateNOS\_H*Arg:CN:CaM:eNOS:pHsp90:pAkt}; \\
d(\text{Arg:CN:CaM:eNOS:pHsp90:pAkt})/dt = & \text{konpAktHsp90*Arg:CN:CaM:eNOS:pHsp90*pAkt} + \\
& \text{konHsp90\_CaMeNOS*Arg:CN:CaM:eNOS:pAkt*pHsp90} + \text{konHsp90\_CaMeNOS*Arg:CN:CaM:eNOS*pAkt:pHsp90} - \\
& \text{kdpAkt*Arg:CN:CaM:eNOS:pHsp90:pAkt} + \text{konCa2C*Ca*Ca*Arg:N:CaM:eNOS:pHsp90:pAkt} - \\
& \text{koffCa2C*Arg:CN:CaM:eNOS:pHsp90:pAkt} + \text{konCa2N*Ca*Ca*Arg:C:CaM:eNOS:pHsp90:pAkt} - \\
& \text{koffCa2N*Arg:CN:CaM:eNOS:pHsp90:pAkt} + \text{kon4eNOS\_H*CN:CaM*Arg:eNOS:pHsp90:pAkt} -
\end{aligned}$$

$\text{koffCaMeNOS\_H*Arg:CN:CaM:eNOS:pHsp90:pAkt} + \text{kon4peNOS\_H*CN:CaM*Arg:eNOS:pHsp90:pAkt} -$   
 $\text{koffCaMpeNOS\_H*Arg:CN:CaM:eNOS:pHsp90:pAkt} - \text{koffpAktHsp90*Arg:CN:CaM:eNOS:pHsp90:pAkt} -$   
 $\text{koffHsp90\_CaMeNOS*Arg:CN:CaM:eNOS:pHsp90:pAkt} - \text{koffHsp90\_CaMeNOS*Arg:CN:CaM:eNOS:pHsp90:pAkt} -$   
 $\text{kcatpAkt\_H*Arg:CN:CaM:eNOS:pHsp90:pAkt} + \text{koneNOSArg\_H*Arg*CN:CaM:eNOS:pHsp90:pAkt} -$   
 $\text{koffeNOSArg\_H*Arg:CN:CaM:eNOS:pHsp90:pAkt} - \text{kateNOS\_H*Arg:CN:CaM:eNOS:pHsp90:pAkt} ;$

$d(\text{C:CaM:peNOS})/dt = \text{kcatpAkt*C:CaM:eNOS:pAkt} - \text{konCa2N*Ca*Ca*C:CaM:peNOS} + \text{koffCa2N*CN:CaM:peNOS} -$   
 $\text{koffCaMpeNOS*C:CaM:peNOS} - \text{konHsp90\_CaMeNOS*C:CaM:peNOS*pHsp90} - \text{kdpeNOS*C:CaM:peNOS} -$   
 $\text{kdegpeNOS*C:CaM:peNOS} - \text{konpeNOSArg*Arg*C:CaM:peNOS} + \text{koffpeNOSArg*Arg:C:CaM:peNOS} +$   
 $\text{kcatpeNOS*Arg:C:CaM:peNOS} + \text{kon2CpeNOS*C:CaM*peNOS} + \text{koffHsp90\_CaMeNOS*C:CaM:peNOS:pHsp90} ;$

$d(\text{Arg:C:CaM:peNOS})/dt = \text{kcatpAkt*Arg:C:CaM:eNOS:pAkt} - \text{konCa2N*Ca*Ca*Arg:C:CaM:peNOS} +$   
 $\text{koffCa2N*Arg:CN:CaM:peNOS} - \text{koffCaMpeNOS*Arg:C:CaM:peNOS} -$   
 $\text{konHsp90\_CaMeNOS*Arg:C:CaM:peNOS*pHsp90} - \text{kdpeNOS*Arg:C:CaM:peNOS} + \text{konpeNOSArg*Arg*C:CaM:peNOS}$   
 $- \text{koffpeNOSArg*Arg:C:CaM:peNOS} - \text{kcatpeNOS*Arg:C:CaM:peNOS} + \text{kon2CpeNOS*C:CaM*Arg:peNOS} +$   
 $\text{koffHsp90\_CaMeNOS*Arg:C:CaM:peNOS:pHsp90} ;$

$d(\text{N:CaM:peNOS})/dt = \text{kcatpAkt*N:CaM:eNOS:pAkt} - \text{konCa2C*Ca*Ca*N:CaM:peNOS} + \text{koffCa2C*CN:CaM:peNOS} -$   
 $\text{koffCaMpeNOS*N:CaM:peNOS} - \text{konHsp90\_CaMeNOS*N:CaM:peNOS*pHsp90} - \text{kdpeNOS*N:CaM:peNOS} -$   
 $\text{kdegpeNOS*N:CaM:peNOS} - \text{konpeNOSArg*Arg*N:CaM:peNOS} + \text{koffpeNOSArg*Arg:N:CaM:peNOS} +$   
 $\text{kcatpeNOS*Arg:N:CaM:peNOS} + \text{kon2NpeNOS*N:CaM*peNOS} + \text{koffHsp90\_CaMeNOS*N:CaM:peNOS:pHsp90} ;$

$d(\text{Arg:N:CaM:peNOS})/dt = \text{kcatpAkt*Arg:N:CaM:eNOS:pAkt} - \text{konCa2C*Ca*Ca*Arg:N:CaM:peNOS} +$   
 $\text{koffCa2C*Arg:CN:CaM:peNOS} - \text{koffCaMpeNOS*Arg:N:CaM:peNOS} -$   
 $\text{konHsp90\_CaMeNOS*Arg:N:CaM:peNOS*pHsp90} - \text{kdpeNOS*Arg:N:CaM:peNOS} +$   
 $\text{konpeNOSArg*Arg*N:CaM:peNOS} - \text{koffpeNOSArg*Arg:N:CaM:peNOS} - \text{kcatpeNOS*Arg:N:CaM:peNOS} +$   
 $\text{kon2NpeNOS*N:CaM*Arg:peNOS} + \text{koffHsp90\_CaMeNOS*N:CaM:peNOS:pHsp90} ;$

$d(\text{CN:CaM:peNOS})/dt = \text{kcatpAkt*CN:CaM:eNOS:pAkt} + \text{konCa2C*Ca*Ca*N:CaM:peNOS} - \text{koffCa2C*CN:CaM:peNOS} +$   
 $\text{konCa2N*Ca*Ca*C:CaM:peNOS} - \text{koffCa2N*CN:CaM:peNOS} - \text{koffCaMpeNOS*CN:CaM:peNOS} -$   
 $\text{konHsp90\_CaMeNOS*CN:CaM:peNOS*pHsp90} - \text{kdpeNOS*CN:CaM:peNOS} - \text{kdegpeNOS*CN:CaM:peNOS} -$   
 $\text{konpeNOSArg*Arg*CN:CaM:peNOS} + \text{koffpeNOSArg*Arg:CN:CaM:peNOS} + \text{kcatpeNOS*Arg:CN:CaM:peNOS} +$   
 $\text{kon4peNOS*CN:CaM*peNOS} + \text{koffHsp90\_CaMeNOS*CN:CaM:peNOS:pHsp90} ;$

$d(\text{Arg:CN:CaM:peNOS})/dt = \text{kcatpAkt*Arg:CN:CaM:eNOS:pAkt} + \text{konCa2C*Ca*Ca*Arg:N:CaM:peNOS} -$   
 $\text{koffCa2C*Arg:CN:CaM:peNOS} + \text{konCa2N*Ca*Ca*Arg:C:CaM:peNOS} - \text{koffCa2N*Arg:CN:CaM:peNOS} -$   
 $\text{koffCaMpeNOS*CN:CaM:peNOS} - \text{konHsp90\_CaMeNOS*Arg:CN:CaM:peNOS*pHsp90} -$   
 $\text{kdpeNOS*Arg:CN:CaM:peNOS} + \text{konpeNOSArg*Arg*CN:CaM:peNOS} - \text{koffpeNOSArg*Arg:CN:CaM:peNOS} -$   
 $\text{kcatpeNOS*Arg:CN:CaM:peNOS} + \text{kon4peNOS*CN:CaM*Arg:peNOS} +$   
 $\text{koffHsp90\_CaMeNOS*Arg:CN:CaM:peNOS:pHsp90} ;$

$d(\text{cGMP:PDE\_a})/dt = \text{ka\_PDE*cGMP:PDE} - \text{kd\_PDE*cGMP:PDE\_a} ;$

$d(\text{Akt:Hsp90})/dt = \text{kdpHsp90*Akt:pHsp90} + \text{kdpAkt*pAkt:Hsp90} - \text{konHsp90eNOS*eNOS*Akt:Hsp90} -$   
 $\text{konHsp90eNOS*Arg:eNOS*Akt:Hsp90} - \text{konHsp90\_CaMeNOS*C:CaM:eNOS*Akt:Hsp90} -$   
 $\text{konHsp90\_CaMeNOS*Arg:C:CaM:eNOS*Akt:Hsp90} - \text{konHsp90\_CaMeNOS*N:CaM:eNOS*Akt:Hsp90} -$   
 $\text{konHsp90\_CaMeNOS*Arg:N:CaM:eNOS*Akt:Hsp90} - \text{konHsp90\_CaMeNOS*CN:CaM:eNOS*Akt:Hsp90} -$   
 $\text{konHsp90\_CaMeNOS*Arg:CN:CaM:eNOS*Akt:Hsp90} + \text{koffHsp90eNOS*eNOS:Hsp90:Akt} +$   
 $\text{koffHsp90eNOS*Arg:eNOS:Hsp90:Akt} + \text{koffHsp90\_CaMeNOS*C:CaM:eNOS:Hsp90:Akt} +$   
 $\text{koffHsp90\_CaMeNOS*Arg:C:CaM:eNOS:Hsp90:Akt} + \text{koffHsp90\_CaMeNOS*N:CaM:eNOS:Hsp90:Akt} +$   
 $\text{koffHsp90\_CaMeNOS*Arg:N:CaM:eNOS:Hsp90:Akt} + \text{koffHsp90\_CaMeNOS*CN:CaM:eNOS:Hsp90:Akt} +$   
 $\text{koffHsp90\_CaMeNOS*Arg:CN:CaM:eNOS:Hsp90:Akt} ;$

$d(\text{eNOS:pHsp90:Akt})/dt = \text{kdpAkt*eNOS:pHsp90:pAkt} + \text{konHsp90eNOS*eNOS*Akt:pHsp90} -$   
 $\text{kon2CeNOS\_H*C:CaM*eNOS:pHsp90:Akt} + \text{koffCaMeNOS\_H*C:CaM:eNOS:pHsp90:Akt} -$   
 $\text{kon2NeNOS\_H*N:CaM*eNOS:pHsp90:Akt} + \text{koffCaMeNOS\_H*N:CaM:eNOS:pHsp90:Akt} -$   
 $\text{kon4eNOS\_H*CN:CaM*eNOS:pHsp90:Akt} + \text{koffCaMeNOS\_H*CN:CaM:eNOS:pHsp90:Akt} -$   
 $\text{kon2CpeNOS\_H*C:CaM*eNOS:pHsp90:Akt} + \text{koffCaMpeNOS\_H*C:CaM:eNOS:pHsp90:Akt} -$   
 $\text{kon2NpeNOS\_H*N:CaM*eNOS:pHsp90:Akt} + \text{koffCaMpeNOS\_H*N:CaM:eNOS:pHsp90:Akt} -$   
 $\text{kon4peNOS\_H*CN:CaM*eNOS:pHsp90:Akt} + \text{koffCaMpeNOS\_H*CN:CaM:eNOS:pHsp90:Akt} -$   
 $\text{koffHsp90eNOS*eNOS:pHsp90:Akt} - \text{koffHsp90eNOS*eNOS:pHsp90:Akt} - \text{konbeNOSArg*Arg*eNOS:pHsp90:Akt} +$   
 $\text{koffbeNOSArg*Arg:eNOS:pHsp90:Akt} + \text{konHsp90eNOS*Akt:eNOS*pHsp90} ;$

$$\begin{aligned}
d(\text{Arg:eNOS:pHsp90:Akt})/dt = & \text{kdpAkt*Arg:eNOS:pHsp90:pAkt} + \text{konHsp90eNOS*Arg:eNOS*Akt:pHsp90} - \\
& \text{kon2CeNOS\_H*C:CaM*Arg:eNOS:pHsp90:Akt} + \text{koffCaMeNOS\_H*Arg:C:CaM:eNOS:pHsp90:Akt} - \\
& \text{kon2NeNOS\_H*N:CaM*Arg:eNOS:pHsp90:Akt} + \text{koffCaMeNOS\_H*Arg:N:CaM:eNOS:pHsp90:Akt} - \\
& \text{kon4eNOS\_H*CN:CaM*Arg:eNOS:pHsp90:Akt} + \text{koffCaMeNOS\_H*Arg:CN:CaM:eNOS:pHsp90:Akt} - \\
& \text{kon2CpeNOS\_H*C:CaM*Arg:eNOS:pHsp90:Akt} + \text{koffCaMpeNOS\_H*Arg:C:CaM:eNOS:pHsp90:Akt} - \\
& \text{kon2NpeNOS\_H*N:CaM*Arg:eNOS:pHsp90:Akt} + \text{koffCaMpeNOS\_H*Arg:N:CaM:eNOS:pHsp90:Akt} - \\
& \text{kon4peNOS\_H*CN:CaM*Arg:eNOS:pHsp90:Akt} + \text{koffCaMpeNOS\_H*Arg:CN:CaM:eNOS:pHsp90:Akt} - \\
& \text{koffHsp90eNOS*Arg:eNOS:pHsp90:Akt} - \text{koffHsp90eNOS*Arg:eNOS:pHsp90:Akt} + \\
& \text{konbeNOSArg*Arg*eNOS:pHsp90:Akt} - \text{koffbeNOSArg*Arg:eNOS:pHsp90:Akt} + \\
& \text{konHsp90eNOS*Arg:Akt:eNOS*pHsp90} ; \\
\\
d(\text{C:CaM:eNOS:pHsp90:Akt})/dt = & \text{kdpAkt*C:CaM:eNOS:pHsp90:pAkt} + \text{konHsp90\_CaMeNOS*C:CaM:eNOS*Akt:pHsp90} - \\
& \text{konCa2N*Ca*Ca*C:CaM:eNOS:pHsp90:Akt} + \text{koffCa2N*CN:CaM:eNOS:pHsp90:Akt} + \\
& \text{kon2CeNOS\_H*C:CaM*eNOS:pHsp90:Akt} - \text{koffCaMeNOS\_H*C:CaM:eNOS:pHsp90:Akt} + \\
& \text{kon2CpeNOS\_H*C:CaM*eNOS:pHsp90:Akt} - \text{koffCaMpeNOS\_H*C:CaM:eNOS:pHsp90:Akt} - \\
& \text{koffHsp90\_CaMeNOS*C:CaM:eNOS:pHsp90:Akt} - \text{koffHsp90\_CaMeNOS*C:CaM:eNOS:pHsp90:Akt} - \\
& \text{koneNOSArg\_H*Arg*C:CaM:eNOS:pHsp90:Akt} + \text{koffeNOSArg\_H*Arg:C:CaM:eNOS:pHsp90:Akt} + \\
& \text{kcateNOS\_H*Arg:C:CaM:eNOS:pHsp90:Akt} + \text{konHsp90\_CaMeNOS*C:CaM:eNOS:Akt*pHsp90} ; \\
\\
d(\text{Arg:C:CaM:eNOS:pHsp90:Akt})/dt = & \text{kdpAkt*Arg:C:CaM:eNOS:pHsp90:pAkt} + \\
& \text{konHsp90\_CaMeNOS*Arg:C:CaM:eNOS*Akt:pHsp90} - \text{konCa2N*Ca*Ca*Arg:C:CaM:eNOS:pHsp90:Akt} + \\
& \text{koffCa2N*Arg:CN:CaM:eNOS:pHsp90:Akt} + \text{kon2CeNOS\_H*C:CaM*Arg:eNOS:pHsp90:Akt} - \\
& \text{koffCaMeNOS\_H*Arg:C:CaM:eNOS:pHsp90:Akt} + \text{kon2CpeNOS\_H*C:CaM*Arg:eNOS:pHsp90:Akt} - \\
& \text{koffCaMpeNOS\_H*Arg:C:CaM:eNOS:pHsp90:Akt} - \text{koffHsp90\_CaMeNOS*Arg:C:CaM:eNOS:pHsp90:Akt} - \\
& \text{koffHsp90\_CaMeNOS*Arg:C:CaM:eNOS:pHsp90:Akt} + \text{koneNOSArg\_H*Arg*C:CaM:eNOS:pHsp90:Akt} - \\
& \text{koffeNOSArg\_H*Arg:C:CaM:eNOS:pHsp90:Akt} - \text{kcateNOS\_H*Arg:C:CaM:eNOS:pHsp90:Akt} + \\
& \text{konHsp90\_CaMeNOS*Arg:C:CaM:eNOS:Akt*pHsp90} ; \\
\\
d(\text{N:CaM:eNOS:pHsp90:Akt})/dt = & \text{kdpAkt*N:CaM:eNOS:pHsp90:pAkt} + \text{konHsp90\_CaMeNOS*N:CaM:eNOS*Akt:pHsp90} - \\
& \text{konCa2C*Ca*Ca*N:CaM:eNOS:pHsp90:Akt} + \text{koffCa2C*CN:CaM:eNOS:pHsp90:Akt} + \\
& \text{kon2NeNOS\_H*N:CaM*eNOS:pHsp90:Akt} - \text{koffCaMeNOS\_H*N:CaM:eNOS:pHsp90:Akt} + \\
& \text{kon2NpeNOS\_H*N:CaM*eNOS:pHsp90:Akt} - \text{koffCaMpeNOS\_H*N:CaM:eNOS:pHsp90:Akt} - \\
& \text{koffHsp90\_CaMeNOS*N:CaM:eNOS:pHsp90:Akt} - \text{koffHsp90\_CaMeNOS*N:CaM:eNOS:pHsp90:Akt} - \\
& \text{koneNOSArg\_H*Arg*N:CaM:eNOS:pHsp90:Akt} + \text{koffeNOSArg\_H*Arg:N:CaM:eNOS:pHsp90:Akt} + \\
& \text{kcateNOS\_H*Arg:N:CaM:eNOS:pHsp90:Akt} + \text{konHsp90\_CaMeNOS*N:CaM:eNOS:Akt*pHsp90} ; \\
\\
d(\text{Arg:N:CaM:eNOS:pHsp90:Akt})/dt = & \text{kdpAkt*Arg:N:CaM:eNOS:pHsp90:pAkt} + \\
& \text{konHsp90\_CaMeNOS*Arg:N:CaM:eNOS*Akt:pHsp90} - \text{konCa2C*Ca*Ca*Arg:N:CaM:eNOS:pHsp90:Akt} + \\
& \text{koffCa2C*Arg:CN:CaM:eNOS:pHsp90:Akt} + \text{kon2NeNOS\_H*N:CaM*Arg:eNOS:pHsp90:Akt} - \\
& \text{koffCaMeNOS\_H*Arg:N:CaM:eNOS:pHsp90:Akt} + \text{kon2NpeNOS\_H*N:CaM*Arg:eNOS:pHsp90:Akt} - \\
& \text{koffCaMpeNOS\_H*Arg:N:CaM:eNOS:pHsp90:Akt} - \text{koffHsp90\_CaMeNOS*Arg:N:CaM:eNOS:pHsp90:Akt} - \\
& \text{koffHsp90\_CaMeNOS*Arg:N:CaM:eNOS:pHsp90:Akt} + \text{koneNOSArg\_H*Arg*N:CaM:eNOS:pHsp90:Akt} - \\
& \text{koffeNOSArg\_H*Arg:N:CaM:eNOS:pHsp90:Akt} - \text{kcateNOS\_H*Arg:N:CaM:eNOS:pHsp90:Akt} + \\
& \text{konHsp90\_CaMeNOS*Arg:N:CaM:eNOS:Akt*pHsp90} ; \\
\\
d(\text{CN:CaM:eNOS:pHsp90:Akt})/dt = & \text{kdpAkt*CN:CaM:eNOS:pHsp90:pAkt} + \text{konHsp90\_CaMeNOS*CN:CaM:eNOS*Akt:pHsp90} + \\
& \text{konCa2C*Ca*Ca*N:CaM:eNOS:pHsp90:Akt} - \text{koffCa2C*CN:CaM:eNOS:pHsp90:Akt} + \\
& \text{konCa2N*Ca*Ca*C:CaM:eNOS:pHsp90:Akt} - \text{koffCa2N*CN:CaM:eNOS:pHsp90:Akt} + \\
& \text{kon4eNOS\_H*CN:CaM*eNOS:pHsp90:Akt} - \text{koffCaMeNOS\_H*CN:CaM:eNOS:pHsp90:Akt} + \\
& \text{kon4peNOS\_H*CN:CaM*eNOS:pHsp90:Akt} - \text{koffCaMpeNOS\_H*CN:CaM:eNOS:pHsp90:Akt} - \\
& \text{koffHsp90\_CaMeNOS*CN:CaM:eNOS:pHsp90:Akt} - \text{koffHsp90\_CaMeNOS*CN:CaM:eNOS:pHsp90:Akt} - \\
& \text{koneNOSArg\_H*Arg*CN:CaM:eNOS:pHsp90:Akt} + \text{koffeNOSArg\_H*Arg:CN:CaM:eNOS:pHsp90:Akt} + \\
& \text{kcateNOS\_H*Arg:CN:CaM:eNOS:pHsp90:Akt} + \text{konHsp90\_CaMeNOS*CN:CaM:eNOS:Hsp90:Akt*pHsp90} ; \\
\\
d(\text{Arg:CN:CaM:eNOS:pHsp90:Akt})/dt = & \text{kdpAkt*Arg:CN:CaM:eNOS:pHsp90:pAkt} + \\
& \text{konHsp90\_CaMeNOS*Arg:CN:CaM:eNOS*Akt:pHsp90} + \text{konCa2C*Ca*Ca*Arg:N:CaM:eNOS:pHsp90:Akt} - \\
& \text{koffCa2C*Arg:CN:CaM:eNOS:pHsp90:Akt} + \text{konCa2N*Ca*Ca*Arg:C:CaM:eNOS:pHsp90:Akt} - \\
& \text{koffCa2N*Arg:CN:CaM:eNOS:pHsp90:Akt} + \text{kon4eNOS\_H*CN:CaM*Arg:eNOS:pHsp90:Akt} - \\
& \text{koffCaMeNOS\_H*Arg:CN:CaM:eNOS:pHsp90:Akt} + \text{kon4peNOS\_H*CN:CaM*Arg:eNOS:pHsp90:Akt} - \\
& \text{koffCaMpeNOS\_H*Arg:CN:CaM:eNOS:pHsp90:Akt} - \text{koffHsp90\_CaMeNOS*Arg:CN:CaM:eNOS:pHsp90:Akt} - \\
& \text{koffHsp90\_CaMeNOS*Arg:CN:CaM:eNOS:pHsp90:Akt} + \text{koneNOSArg\_H*Arg*CN:CaM:eNOS:pHsp90:Akt} -
\end{aligned}$$

$$\begin{aligned} & \text{koffeNOSArg\_H*Arg:CN:CaM:eNOS:pHsp90:Akt} - \text{kateNOS\_H*Arg:CN:CaM:eNOS:pHsp90:Akt} + \\ & \text{konHsp90\_CaMeNOS*Arg:CN:CaM:eNOS:Hsp90:Akt*pHsp90} ; \\ d(\text{peNOS})/dt = & \text{koffCaMpeNOS*C:CaM:peNOS} + \text{koffCaMpeNOS*N:CaM:peNOS} + \text{koffCaMpeNOS*CN:CaM:peNOS} - \\ & \text{kon2CpeNOS*C:CaM*peNOS} - \text{kon2NpeNOS*N:CaM*peNOS} - \text{kon4peNOS*CN:CaM*peNOS} - \\ & \text{konHsp90eNOS*peNOS*pHsp90} - \text{kdpeNOS*peNOS} - \text{kdegpeNOS*peNOS} - \text{konpeNOSArg*Arg*peNOS} + \\ & \text{koffpeNOSArg*Arg:peNOS} + \text{kcatpeNOS*Arg:peNOS} + \text{koffHsp90eNOS*peNOS:pHsp90} ; \\ d(\text{Arg:peNOS})/dt = & \text{koffCaMpeNOS*Arg:C:CaM:peNOS} + \text{koffCaMpeNOS*Arg:N:CaM:peNOS} + \text{koffCaMpeNOS*CN:CaM:peNOS} \\ & - \text{kon2CpeNOS*C:CaM*Arg:peNOS} - \text{kon2NpeNOS*N:CaM*Arg:peNOS} - \text{kon4peNOS*CN:CaM*Arg:peNOS} - \\ & \text{konHsp90eNOS*Arg:peNOS*pHsp90} - \text{kdpeNOS*Arg:peNOS} + \text{konpeNOSArg*Arg*peNOS} - \\ & \text{koffpeNOSArg*Arg:peNOS} - \text{kcatpeNOS*Arg:peNOS} + \text{koffHsp90eNOS*Arg:peNOS:pHsp90} ; \\ d(\text{C:CaM:peNOS:pHsp90})/dt = & \text{konHsp90\_CaMeNOS*C:CaM:peNOS*pHsp90} + \text{kcatpAkt\_H*C:CaM:eNOS:pHsp90:pAkt} - \\ & \text{konCa2N*Ca*Ca*C:CaM:peNOS:pHsp90} + \text{koffCa2N*CN:CaM:peNOS:pHsp90} - \\ & \text{koffCaMpeNOS\_H*C:CaM:peNOS:pHsp90} - \text{koffHsp90\_CaMeNOS*C:CaM:peNOS:pHsp90} - \\ & \text{kdpeNOS*C:CaM:peNOS:pHsp90} - \text{konpeNOSArg\_H*Arg*C:CaM:peNOS:pHsp90} + \\ & \text{koffpeNOSArg\_H*Arg:C:CaM:peNOS:pHsp90} + \text{kcatpeNOS\_H*Arg:C:CaM:peNOS:pHsp90} + \\ & \text{kon2CpeNOS\_H*C:CaM*peNOS:pHsp90} ; \\ d(\text{Arg:C:CaM:peNOS:pHsp90})/dt = & \text{konHsp90\_CaMeNOS*Arg:C:CaM:peNOS*pHsp90} + \\ & \text{kcatpAkt\_H*Arg:C:CaM:eNOS:pHsp90:pAkt} - \text{konCa2N*Ca*Ca*Arg:C:CaM:peNOS:pHsp90} + \\ & \text{koffCa2N*Arg:CN:CaM:peNOS:pHsp90} - \text{koffCaMpeNOS\_H*Arg:C:CaM:peNOS:pHsp90} - \\ & \text{koffHsp90\_CaMeNOS*Arg:C:CaM:peNOS:pHsp90} - \text{kdpeNOS*Arg:C:CaM:peNOS:pHsp90} + \\ & \text{konpeNOSArg\_H*Arg*C:CaM:peNOS:pHsp90} - \text{koffpeNOSArg\_H*Arg:C:CaM:peNOS:pHsp90} - \\ & \text{kcatpeNOS\_H*Arg:C:CaM:peNOS:pHsp90} + \text{kon2CpeNOS\_H*C:CaM*Arg:peNOS:pHsp90} ; \\ d(\text{N:CaM:peNOS:pHsp90})/dt = & \text{konHsp90\_CaMeNOS*N:CaM:peNOS*pHsp90} + \text{kcatpAkt\_H*N:CaM:eNOS:pHsp90:pAkt} - \\ & \text{konCa2C*Ca*Ca*N:CaM:peNOS:pHsp90} + \text{koffCa2C*CN:CaM:peNOS:pHsp90} - \\ & \text{koffCaMpeNOS\_H*N:CaM:peNOS:pHsp90} - \text{koffHsp90\_CaMeNOS*N:CaM:peNOS:pHsp90} - \\ & \text{kdpeNOS*N:CaM:peNOS:pHsp90} - \text{konpeNOSArg\_H*Arg*N:CaM:peNOS:pHsp90} + \\ & \text{koffpeNOSArg\_H*Arg:N:CaM:peNOS:pHsp90} + \text{kcatpeNOS\_H*Arg:N:CaM:peNOS:pHsp90} + \\ & \text{kon2NpeNOS\_H*N:CaM*peNOS:pHsp90} ; \\ d(\text{Arg:N:CaM:peNOS:pHsp90})/dt = & \text{konHsp90\_CaMeNOS*Arg:N:CaM:peNOS*pHsp90} + \\ & \text{kcatpAkt\_H*Arg:N:CaM:eNOS:pHsp90:pAkt} - \text{konCa2C*Ca*Ca*Arg:N:CaM:peNOS:pHsp90} + \\ & \text{koffCa2C*Arg:CN:CaM:peNOS:pHsp90} - \text{koffCaMpeNOS\_H*Arg:N:CaM:peNOS:pHsp90} - \\ & \text{koffHsp90\_CaMeNOS*N:CaM:peNOS:pHsp90} - \text{kdpeNOS*Arg:N:CaM:peNOS:pHsp90} + \\ & \text{konpeNOSArg\_H*Arg*N:CaM:peNOS:pHsp90} - \text{koffpeNOSArg\_H*Arg:N:CaM:peNOS:pHsp90} - \\ & \text{kcatpeNOS\_H*Arg:N:CaM:peNOS:pHsp90} + \text{kon2NpeNOS\_H*N:CaM*Arg:peNOS:pHsp90} ; \\ d(\text{CN:CaM:peNOS:pHsp90})/dt = & \text{konHsp90\_CaMeNOS*CN:CaM:peNOS*pHsp90} + \text{kcatpAkt\_H*CN:CaM:eNOS:pHsp90:pAkt} + \\ & \text{konCa2C*Ca*Ca*N:CaM:peNOS:pHsp90} - \text{koffCa2C*CN:CaM:peNOS:pHsp90} + \\ & \text{konCa2N*Ca*Ca*C:CaM:peNOS:pHsp90} - \text{koffCa2N*CN:CaM:peNOS:pHsp90} - \\ & \text{koffCaMpeNOS\_H*CN:CaM:peNOS:pHsp90} - \text{koffHsp90\_CaMeNOS*CN:CaM:peNOS:pHsp90} - \\ & \text{kdpeNOS*Arg:CN:CaM:peNOS:pHsp90} - \text{konpeNOSArg\_H*Arg*CN:CaM:peNOS:pHsp90} + \\ & \text{koffpeNOSArg\_H*Arg:CN:CaM:peNOS:pHsp90} + \text{kcatpeNOS\_H*Arg:CN:CaM:peNOS:pHsp90} + \\ & \text{kon4peNOS\_H*CN:CaM*peNOS:pHsp90} ; \\ d(\text{Arg:CN:CaM:peNOS:pHsp90})/dt = & \text{konHsp90\_CaMeNOS*Arg:CN:CaM:peNOS*pHsp90} + \\ & \text{kcatpAkt\_H*Arg:CN:CaM:eNOS:pHsp90:pAkt} + \text{konCa2C*Ca*Ca*Arg:N:CaM:peNOS:pHsp90} - \\ & \text{koffCa2C*Arg:CN:CaM:peNOS:pHsp90} + \text{konCa2N*Ca*Ca*Arg:C:CaM:peNOS:pHsp90} - \\ & \text{koffCa2N*Arg:CN:CaM:peNOS:pHsp90} - \text{koffCaMpeNOS\_H*Arg:CN:CaM:peNOS:pHsp90} - \\ & \text{koffHsp90\_CaMeNOS*Arg:CN:CaM:peNOS:pHsp90} - \text{kdpeNOS*Arg:CN:CaM:peNOS:pHsp90} + \\ & \text{konpeNOSArg\_H*Arg*CN:CaM:peNOS:pHsp90} - \text{koffpeNOSArg\_H*Arg:CN:CaM:peNOS:pHsp90} - \\ & \text{kcatpeNOS\_H*Arg:CN:CaM:peNOS:pHsp90} + \text{kon4peNOS\_H*CN:CaM*Arg:peNOS:pHsp90} ; \\ d(\text{eNOS:Hsp90:pAkt})/dt = & \text{konHsp90eNOS*eNOS*pAkt:Hsp90} - \text{kdpAkt*eNOS:Hsp90:pAkt} - \\ & \text{kon2CeNOS\_H*C:CaM*eNOS:Hsp90:pAkt} + \text{koffCaMeNOS\_H*C:CaM:eNOS:Hsp90:pAkt} - \\ & \text{kon2NeNOS\_H*N:CaM*eNOS:Hsp90:pAkt} + \text{koffCaMeNOS\_H*N:CaM:eNOS:Hsp90:pAkt} - \\ & \text{kon4eNOS\_H*CN:CaM*eNOS:Hsp90:pAkt} + \text{koffCaMeNOS\_H*CN:CaM:eNOS:Hsp90:pAkt} - \\ & \text{koffHsp90eNOS*eNOS:Hsp90:pAkt} - \text{koffpAktHsp90*eNOS:Hsp90:pAkt} - \text{konbeNOSArg*Arg*eNOS:Hsp90:pAkt} + \\ & \text{koffbeNOSArg*Arg:eNOS:Hsp90:pAkt} + \text{konpAktHsp90*eNOS:Hsp90*pAkt} ; \end{aligned}$$

$$\begin{aligned}
d(\text{Arg:eNOS:Hsp90:pAkt})/dt = & \text{konHsp90eNOS*Arg:eNOS*pAkt:Hsp90} - \text{kdpAkt*Arg:eNOS:Hsp90:pAkt} - \\
& \text{kon2CeNOS\_H*C:CaM*Arg:eNOS:Hsp90:pAkt} + \text{koffCaMeNOS\_H*Arg:C:CaM:eNOS:Hsp90:pAkt} - \\
& \text{kon2NeNOS\_H*N:CaM*Arg:eNOS:Hsp90:pAkt} + \text{koffCaMeNOS\_H*Arg:N:CaM:eNOS:Hsp90:pAkt} - \\
& \text{kon4eNOS\_H*CN:CaM*Arg:eNOS:Hsp90:pAkt} + \text{koffCaMeNOS\_H*Arg:CN:CaM:eNOS:Hsp90:pAkt} - \\
& \text{koffHsp90eNOS*Arg:eNOS:Hsp90:pAkt} - \text{koffpAktHsp90*Arg:eNOS:Hsp90:pAkt} + \\
& \text{konbeNOSArg*Arg*eNOS:Hsp90:pAkt} - \text{koffbeNOSArg*Arg:eNOS:Hsp90:pAkt} + \\
& \text{konpAktHsp90*Arg:eNOS:Hsp90*pAkt} ; \\
d(\text{C:CaM:eNOS:Hsp90:pAkt})/dt = & \text{konHsp90\_CaMeNOS*C:CaM:eNOS*pAkt:Hsp90} - \text{kdpAkt*C:CaM:eNOS:Hsp90:pAkt} - \\
& \text{konCa2N*Ca*Ca*C:CaM:eNOS:Hsp90:pAkt} + \text{koffCa2N*CN:CaM:eNOS:Hsp90:pAkt} + \\
& \text{kon2CeNOS\_H*C:CaM*eNOS:Hsp90:pAkt} - \text{koffCaMeNOS\_H*C:CaM:eNOS:Hsp90:pAkt} - \\
& \text{koffpAktHsp90*C:CaM:eNOS:Hsp90:pAkt} - \text{koffHsp90\_CaMeNOS*C:CaM:eNOS:Hsp90:pAkt} - \\
& \text{koneNOSArg\_H*Arg*C:CaM:eNOS:Hsp90:pAkt} + \text{koffeNOSArg\_H*Arg:C:CaM:eNOS:Hsp90:pAkt} + \\
& \text{kateNOS\_H*Arg:C:CaM:eNOS:Hsp90:pAkt} + \text{konpAktHsp90*C:CaM:eNOS:Hsp90*pAkt} ; \\
d(\text{Arg:C:CaM:eNOS:Hsp90:pAkt})/dt = & \text{konHsp90\_CaMeNOS*Arg:C:CaM:eNOS*pAkt:Hsp90} - \\
& \text{kdpAkt*Arg:C:CaM:eNOS:Hsp90:pAkt} - \text{konCa2N*Ca*Ca*Arg:C:CaM:eNOS:Hsp90:pAkt} + \\
& \text{koffCa2N*Arg:CN:CaM:eNOS:Hsp90:pAkt} + \text{kon2CeNOS\_H*C:CaM*Arg:eNOS:Hsp90:pAkt} - \\
& \text{koffCaMeNOS\_H*Arg:C:CaM:eNOS:Hsp90:pAkt} - \text{koffpAktHsp90*Arg:C:CaM:eNOS:Hsp90:pAkt} - \\
& \text{koffHsp90\_CaMeNOS*Arg:C:CaM:eNOS:Hsp90:pAkt} + \text{koneNOSArg\_H*Arg*C:CaM:eNOS:Hsp90:pAkt} - \\
& \text{koffeNOSArg\_H*Arg:C:CaM:eNOS:Hsp90:pAkt} - \text{kateNOS\_H*Arg:C:CaM:eNOS:Hsp90:pAkt} + \\
& \text{konpAktHsp90*Arg:C:CaM:eNOS:Hsp90*pAkt} ; \\
d(\text{N:CaM:eNOS:Hsp90:pAkt})/dt = & \text{konHsp90\_CaMeNOS*N:CaM:eNOS*pAkt:Hsp90} - \text{kdpAkt*N:CaM:eNOS:Hsp90:pAkt} - \\
& \text{konCa2C*Ca*Ca*N:CaM:eNOS:Hsp90:pAkt} + \text{koffCa2C*CN:CaM:eNOS:Hsp90:pAkt} + \\
& \text{kon2NeNOS\_H*N:CaM*eNOS:Hsp90:pAkt} - \text{koffCaMeNOS\_H*N:CaM:eNOS:Hsp90:pAkt} - \\
& \text{koffpAktHsp90*N:CaM:eNOS:Hsp90:pAkt} - \text{koffHsp90\_CaMeNOS*N:CaM:eNOS:Hsp90:pAkt} - \\
& \text{koneNOSArg\_H*Arg*N:CaM:eNOS:Hsp90:pAkt} + \text{koffeNOSArg\_H*Arg:N:CaM:eNOS:Hsp90:pAkt} + \\
& \text{kateNOS\_H*Arg:N:CaM:eNOS:Hsp90:pAkt} + \text{konpAktHsp90*N:CaM:eNOS:Hsp90*pAkt} ; \\
d(\text{Arg:N:CaM:eNOS:Hsp90:pAkt})/dt = & \text{konHsp90\_CaMeNOS*Arg:N:CaM:eNOS*pAkt:Hsp90} - \\
& \text{kdpAkt*Arg:N:CaM:eNOS:Hsp90:pAkt} - \text{konCa2C*Ca*Ca*Arg:N:CaM:eNOS:Hsp90:pAkt} + \\
& \text{koffCa2C*Arg:CN:CaM:eNOS:Hsp90:pAkt} + \text{kon2NeNOS\_H*N:CaM*Arg:eNOS:Hsp90:pAkt} - \\
& \text{koffCaMeNOS\_H*Arg:N:CaM:eNOS:Hsp90:pAkt} - \text{koffpAktHsp90*Arg:N:CaM:eNOS:Hsp90:pAkt} - \\
& \text{koffHsp90\_CaMeNOS*Arg:N:CaM:eNOS:Hsp90:pAkt} + \text{koneNOSArg\_H*Arg*N:CaM:eNOS:Hsp90:pAkt} - \\
& \text{koffeNOSArg\_H*Arg:N:CaM:eNOS:Hsp90:pAkt} - \text{kateNOS\_H*Arg:N:CaM:eNOS:Hsp90:pAkt} + \\
& \text{konpAktHsp90*Arg:N:CaM:eNOS:Hsp90*pAkt} ; \\
d(\text{CN:CaM:eNOS:Hsp90:pAkt})/dt = & \text{konHsp90\_CaMeNOS*CN:CaM:eNOS*pAkt:Hsp90} - \text{kdpAkt*CN:CaM:eNOS:Hsp90:pAkt} + \\
& \text{konCa2C*Ca*Ca*N:CaM:eNOS:Hsp90:pAkt} - \text{koffCa2C*CN:CaM:eNOS:Hsp90:pAkt} + \\
& \text{konCa2N*Ca*Ca*C:CaM:eNOS:Hsp90:pAkt} - \text{koffCa2N*CN:CaM:eNOS:Hsp90:pAkt} + \\
& \text{kon4eNOS\_H*CN:CaM*eNOS:Hsp90:pAkt} - \text{koffCaMeNOS\_H*CN:CaM:eNOS:Hsp90:pAkt} - \\
& \text{koffpAktHsp90*CN:CaM:eNOS:Hsp90:pAkt} - \text{koffHsp90\_CaMeNOS*CN:CaM:eNOS:Hsp90:pAkt} - \\
& \text{koneNOSArg\_H*Arg*CN:CaM:eNOS:Hsp90:pAkt} + \text{koffeNOSArg\_H*Arg:CN:CaM:eNOS:Hsp90:pAkt} + \\
& \text{kateNOS\_H*Arg:CN:CaM:eNOS:Hsp90:pAkt} + \text{konpAktHsp90*CN:CaM:eNOS:Hsp90*pAkt} ; \\
d(\text{Arg:CN:CaM:eNOS:Hsp90:pAkt})/dt = & \text{konHsp90\_CaMeNOS*Arg:CN:CaM:eNOS*pAkt:Hsp90} - \\
& \text{kdpAkt*Arg:CN:CaM:eNOS:Hsp90:pAkt} + \text{konCa2C*Ca*Ca*Arg:N:CaM:eNOS:Hsp90:pAkt} - \\
& \text{koffCa2C*Arg:CN:CaM:eNOS:Hsp90:pAkt} + \text{konCa2N*Ca*Ca*Arg:C:CaM:eNOS:Hsp90:pAkt} - \\
& \text{koffCa2N*Arg:CN:CaM:eNOS:Hsp90:pAkt} + \text{kon4eNOS\_H*CN:CaM*Arg:eNOS:Hsp90:pAkt} - \\
& \text{koffCaMeNOS\_H*Arg:CN:CaM:eNOS:Hsp90:pAkt} - \text{koffpAktHsp90*Arg:CN:CaM:eNOS:Hsp90:pAkt} - \\
& \text{koffHsp90\_CaMeNOS*Arg:CN:CaM:eNOS:Hsp90:pAkt} + \text{koneNOSArg\_H*Arg*CN:CaM:eNOS:Hsp90:pAkt} - \\
& \text{koffeNOSArg\_H*Arg:CN:CaM:eNOS:Hsp90:pAkt} - \text{kateNOS\_H*Arg:CN:CaM:eNOS:Hsp90:pAkt} + \\
& \text{konpAktHsp90*Arg:CN:CaM:eNOS:Hsp90*pAkt} ; \\
d(\text{eNOS:Hsp90:Akt})/dt = & \text{kdpAkt*eNOS:Hsp90:pAkt} + \text{konHsp90eNOS*eNOS*Akt:Hsp90} - \\
& \text{kon2CeNOS\_H*C:CaM*eNOS:Hsp90:Akt} + \text{koffCaMeNOS\_H*C:CaM:eNOS:Hsp90:Akt} - \\
& \text{kon2NeNOS\_H*N:CaM*eNOS:Hsp90:Akt} + \text{koffCaMeNOS\_H*N:CaM:eNOS:Hsp90:Akt} - \\
& \text{kon4eNOS\_H*CN:CaM*eNOS:Hsp90:Akt} + \text{koffCaMeNOS\_H*CN:CaM:eNOS:Hsp90:Akt} - \\
& \text{koffHsp90eNOS*eNOS:Hsp90:Akt} - \text{konbeNOSArg*Arg*eNOS:Hsp90:Akt} + \text{koffbeNOSArg*Arg:eNOS:Hsp90:Akt} ;
\end{aligned}$$

$$\begin{aligned}
d(\text{Arg:eNOS:Hsp90:Akt})/dt &= \text{kdpAkt*Arg:eNOS:Hsp90:pAkt} + \text{konHsp90eNOS*Arg:eNOS*Akt:Hsp90} - \\
&\quad \text{kon2CeNOS\_H*C:CaM*Arg:eNOS:Hsp90:Akt} + \text{koffCaMeNOS\_H*Arg:C:CaM:eNOS:Hsp90:Akt} - \\
&\quad \text{kon2NeNOS\_H*N:CaM*Arg:eNOS:Hsp90:Akt} + \text{koffCaMeNOS\_H*Arg:N:CaM:eNOS:Hsp90:Akt} - \\
&\quad \text{kon4eNOS\_H*CN:CaM*Arg:eNOS:Hsp90:Akt} + \text{koffCaMeNOS\_H*Arg:CN:CaM:eNOS:Hsp90:Akt} - \\
&\quad \text{koffHsp90eNOS*Arg:eNOS:Hsp90:Akt} + \text{konbeNOSArg*Arg*eNOS:Hsp90:Akt} - \text{koffbeNOSArg*Arg:eNOS:Hsp90:Akt} ; \\
d(\text{C:CaM:eNOS:Hsp90:Akt})/dt &= \text{kdpAkt*C:CaM:eNOS:Hsp90:pAkt} + \text{konHsp90\_CaMeNOS*C:CaM:eNOS*Akt:Hsp90} - \\
&\quad \text{konCa2N*Ca*Ca*C:CaM:eNOS:Hsp90:Akt} + \text{koffCa2N*CN:CaM:eNOS:Hsp90:Akt} + \\
&\quad \text{kon2CeNOS\_H*C:CaM*eNOS:Hsp90:Akt} - \text{koffCaMeNOS\_H*C:CaM:eNOS:Hsp90:Akt} - \\
&\quad \text{koffHsp90\_CaMeNOS*C:CaM:eNOS:Hsp90:Akt} - \text{koneNOSArg\_H*Arg*C:CaM:eNOS:Hsp90:Akt} + \\
&\quad \text{koffeNOSArg\_H*Arg:C:CaM:eNOS:Hsp90:Akt} + \text{kateNOS\_H*Arg:C:CaM:eNOS:Hsp90:Akt} ; \\
d(\text{Arg:C:CaM:eNOS:Hsp90:Akt})/dt &= \text{kdpAkt*Arg:C:CaM:eNOS:Hsp90:pAkt} + \\
&\quad \text{konHsp90\_CaMeNOS*Arg:C:CaM:eNOS*Akt:Hsp90} - \text{konCa2N*Ca*Ca*Arg:C:CaM:eNOS:Hsp90:Akt} + \\
&\quad \text{koffCa2N*Arg:CN:CaM:eNOS:Hsp90:Akt} + \text{kon2CeNOS\_H*C:CaM*Arg:eNOS:Hsp90:Akt} - \\
&\quad \text{koffCaMeNOS\_H*Arg:C:CaM:eNOS:Hsp90:Akt} - \text{koffHsp90\_CaMeNOS*Arg:C:CaM:eNOS:Hsp90:Akt} + \\
&\quad \text{koneNOSArg\_H*Arg*C:CaM:eNOS:Hsp90:Akt} - \text{koffeNOSArg\_H*Arg:C:CaM:eNOS:Hsp90:Akt} - \\
&\quad \text{kateNOS\_H*Arg:C:CaM:eNOS:Hsp90:Akt} ; \\
d(\text{N:CaM:eNOS:Hsp90:Akt})/dt &= \text{kdpAkt*N:CaM:eNOS:Hsp90:pAkt} + \text{konHsp90\_CaMeNOS*N:CaM:eNOS*Akt:Hsp90} - \\
&\quad \text{konCa2C*Ca*Ca*N:CaM:eNOS:Hsp90:Akt} + \text{koffCa2C*CN:CaM:eNOS:Hsp90:Akt} + \\
&\quad \text{kon2NeNOS\_H*N:CaM*eNOS:Hsp90:Akt} - \text{koffCaMeNOS\_H*N:CaM:eNOS:Hsp90:Akt} - \\
&\quad \text{koffHsp90\_CaMeNOS*N:CaM:eNOS:Hsp90:Akt} - \text{koneNOSArg\_H*Arg*N:CaM:eNOS:Hsp90:Akt} + \\
&\quad \text{koffeNOSArg\_H*Arg:N:CaM:eNOS:Hsp90:Akt} + \text{kateNOS\_H*Arg:N:CaM:eNOS:Hsp90:Akt} ; \\
d(\text{Arg:N:CaM:eNOS:Hsp90:Akt})/dt &= \text{kdpAkt*Arg:N:CaM:eNOS:Hsp90:pAkt} + \\
&\quad \text{konHsp90\_CaMeNOS*Arg:N:CaM:eNOS*Akt:Hsp90} - \text{konCa2C*Ca*Ca*Arg:N:CaM:eNOS:Hsp90:Akt} + \\
&\quad \text{koffCa2C*Arg:CN:CaM:eNOS:Hsp90:Akt} + \text{kon2NeNOS\_H*N:CaM*Arg:eNOS:Hsp90:Akt} - \\
&\quad \text{koffCaMeNOS\_H*Arg:N:CaM:eNOS:Hsp90:Akt} - \text{koffHsp90\_CaMeNOS*Arg:N:CaM:eNOS:Hsp90:Akt} + \\
&\quad \text{koneNOSArg\_H*Arg*N:CaM:eNOS:Hsp90:Akt} - \text{koffeNOSArg\_H*Arg:N:CaM:eNOS:Hsp90:Akt} - \\
&\quad \text{kateNOS\_H*Arg:N:CaM:eNOS:Hsp90:Akt} ; \\
d(\text{CN:CaM:eNOS:Hsp90:Akt})/dt &= \text{kdpAkt*CN:CaM:eNOS:Hsp90:pAkt} + \text{konHsp90\_CaMeNOS*CN:CaM:eNOS*Akt:Hsp90} + \\
&\quad \text{konCa2C*Ca*Ca*N:CaM:eNOS:Hsp90:Akt} - \text{koffCa2C*CN:CaM:eNOS:Hsp90:Akt} + \\
&\quad \text{konCa2N*Ca*Ca*C:CaM:eNOS:Hsp90:Akt} - \text{koffCa2N*CN:CaM:eNOS:Hsp90:Akt} + \\
&\quad \text{kon4eNOS\_H*CN:CaM*eNOS:Hsp90:Akt} - \text{koffCaMeNOS\_H*CN:CaM:eNOS:Hsp90:Akt} - \\
&\quad \text{koffHsp90\_CaMeNOS*CN:CaM:eNOS:Hsp90:Akt} - \text{koneNOSArg\_H*Arg*CN:CaM:eNOS:Hsp90:Akt} + \\
&\quad \text{koffeNOSArg\_H*Arg:CN:CaM:eNOS:Hsp90:Akt} + \text{kateNOS\_H*Arg:CN:CaM:eNOS:Hsp90:Akt} ; \\
d(\text{Arg:CN:CaM:eNOS:Hsp90:Akt})/dt &= \text{kdpAkt*Arg:CN:CaM:eNOS:Hsp90:pAkt} + \\
&\quad \text{konHsp90\_CaMeNOS*Arg:CN:CaM:eNOS*Akt:Hsp90} + \text{konCa2C*Ca*Ca*Arg:N:CaM:eNOS:Hsp90:Akt} - \\
&\quad \text{koffCa2C*Arg:CN:CaM:eNOS:Hsp90:Akt} + \text{konCa2N*Ca*Ca*Arg:C:CaM:eNOS:Hsp90:Akt} - \\
&\quad \text{koffCa2N*Arg:CN:CaM:eNOS:Hsp90:Akt} + \text{kon4eNOS\_H*CN:CaM*Arg:eNOS:Hsp90:Akt} - \\
&\quad \text{koffCaMeNOS\_H*Arg:CN:CaM:eNOS:Hsp90:Akt} - \text{koffHsp90\_CaMeNOS*Arg:CN:CaM:eNOS:Hsp90:Akt} + \\
&\quad \text{koneNOSArg\_H*Arg*CN:CaM:eNOS:Hsp90:Akt} - \text{koffeNOSArg\_H*Arg:CN:CaM:eNOS:Hsp90:Akt} - \\
&\quad \text{kateNOS\_H*Arg:CN:CaM:eNOS:Hsp90:Akt} ; \\
d(\text{peNOS:pHsp90})/dt &= \text{koffCaMpeNOS\_H*C:CaM:peNOS:pHsp90} + \text{koffCaMpeNOS\_H*N:CaM:peNOS:pHsp90} + \\
&\quad \text{koffCaMpeNOS\_H*CN:CaM:peNOS:pHsp90} + \text{konHsp90eNOS*peNOS*pHsp90} - \\
&\quad \text{kon2CpeNOS\_H*C:CaM*peNOS:pHsp90} - \text{kon2NpeNOS\_H*N:CaM*peNOS:pHsp90} - \\
&\quad \text{kon4peNOS\_H*CN:CaM*peNOS:pHsp90} - \text{koffHsp90eNOS*peNOS:pHsp90} - \text{kdpeNOS*peNOS:pHsp90} - \\
&\quad \text{konpeNOSArg\_H*Arg*peNOS:pHsp90} + \text{koffpeNOSArg\_H*Arg:peNOS:pHsp90} + \text{katepeNOS\_H*Arg:peNOS:pHsp90} ; \\
d(\text{Arg:peNOS:pHsp90})/dt &= \text{koffCaMpeNOS\_H*Arg:C:CaM:peNOS:pHsp90} + \text{koffCaMpeNOS\_H*Arg:N:CaM:peNOS:pHsp90} + \\
&\quad \text{koffCaMpeNOS\_H*Arg:CN:CaM:peNOS:pHsp90} + \text{konHsp90eNOS*Arg:peNOS*pHsp90} - \\
&\quad \text{kon2CpeNOS\_H*C:CaM*Arg:peNOS:pHsp90} - \text{kon2NpeNOS\_H*N:CaM*Arg:peNOS:pHsp90} - \\
&\quad \text{kon4peNOS\_H*CN:CaM*Arg:peNOS:pHsp90} - \text{koffHsp90eNOS*Arg:peNOS:pHsp90} - \text{kdpeNOS*Arg:peNOS:pHsp90} + \\
&\quad \text{konpeNOSArg\_H*Arg*peNOS:pHsp90} - \text{koffpeNOSArg\_H*Arg:peNOS:pHsp90} - \text{katepeNOS\_H*Arg:peNOS:pHsp90} ; \\
d(\text{eNOS:Hsp90})/dt &= \text{koffpAktHsp90*eNOS:Hsp90:pAkt} - \text{kon2CeNOS\_H*C:CaM*eNOS:Hsp90} + \\
&\quad \text{koffCaMeNOS\_H*C:CaM:eNOS:Hsp90} - \text{kon2NeNOS\_H*N:CaM*eNOS:Hsp90} + \text{koffCaMeNOS\_H*N:CaM:eNOS:Hsp90} \\
&\quad - \text{kon4eNOS\_H*CN:CaM*eNOS:Hsp90} + \text{koffCaMeNOS\_H*CN:CaM:eNOS:Hsp90} - \text{konpAktHsp90*eNOS:Hsp90*pAkt} \\
&\quad - \text{konbeNOSArg*Arg*eNOS:Hsp90} + \text{koffbeNOSArg*Arg:eNOS:Hsp90} ;
\end{aligned}$$

$$\begin{aligned}
d(\text{Arg:eNOS:Hsp90})/dt &= \text{koffpAktHsp90*Arg:eNOS:Hsp90:pAkt} - \text{kon2CeNOS\_H*C:CaM*Arg:eNOS:Hsp90} + \\
&\quad \text{koffCaMeNOS\_H*Arg:C:CaM:eNOS:Hsp90} - \text{kon2NeNOS\_H*N:CaM*Arg:eNOS:Hsp90} + \\
&\quad \text{koffCaMeNOS\_H*Arg:N:CaM:eNOS:Hsp90} - \text{kon4eNOS\_H*CN:CaM*Arg:eNOS:Hsp90} + \\
&\quad \text{koffCaMeNOS\_H*Arg:CN:CaM:eNOS:Hsp90} - \text{konpAktHsp90*Arg:eNOS:Hsp90*pAkt} + \\
&\quad \text{konbeNOSArg*Arg*eNOS:Hsp90} - \text{koffbeNOSArg*Arg:eNOS:Hsp90} ; \\
d(\text{C:CaM:eNOS:Hsp90})/dt &= \text{koffpAktHsp90*C:CaM:eNOS:Hsp90:pAkt} - \text{konCa2N*Ca*Ca*C:CaM:eNOS:Hsp90} + \\
&\quad \text{koffCa2N*CN:CaM:eNOS:Hsp90} + \text{kon2CeNOS\_H*C:CaM*eNOS:Hsp90} - \text{koffCaMeNOS\_H*C:CaM:eNOS:Hsp90} - \\
&\quad \text{konpAktHsp90*C:CaM:eNOS:Hsp90*pAkt} - \text{koneNOSArg\_H*Arg*C:CaM:eNOS:Hsp90} + \\
&\quad \text{koffeNOSArg\_H*Arg:C:CaM:eNOS:Hsp90} + \text{kateNOS\_H*Arg:C:CaM:eNOS:Hsp90} ; \\
d(\text{Arg:C:CaM:eNOS:Hsp90})/dt &= \text{koffpAktHsp90*Arg:C:CaM:eNOS:Hsp90:pAkt} - \text{konCa2N*Ca*Ca*Arg:C:CaM:eNOS:Hsp90} + \\
&\quad \text{koffCa2N*Arg:CN:CaM:eNOS:Hsp90} + \text{kon2CeNOS\_H*C:CaM*Arg:eNOS:Hsp90} - \\
&\quad \text{koffCaMeNOS\_H*Arg:C:CaM:eNOS:Hsp90} - \text{konpAktHsp90*Arg:C:CaM:eNOS:Hsp90*pAkt} + \\
&\quad \text{koneNOSArg\_H*Arg*C:CaM:eNOS:Hsp90} - \text{koffeNOSArg\_H*Arg:C:CaM:eNOS:Hsp90} - \\
&\quad \text{kateNOS\_H*Arg:C:CaM:eNOS:Hsp90} ; \\
d(\text{N:CaM:eNOS:Hsp90})/dt &= \text{koffpAktHsp90*N:CaM:eNOS:Hsp90:pAkt} - \text{konCa2C*Ca*Ca*N:CaM:eNOS:Hsp90} + \\
&\quad \text{koffCa2C*CN:CaM:eNOS:Hsp90} + \text{kon2NeNOS\_H*N:CaM*eNOS:Hsp90} - \text{koffCaMeNOS\_H*N:CaM:eNOS:Hsp90} - \\
&\quad \text{konpAktHsp90*N:CaM:eNOS:Hsp90*pAkt} - \text{koneNOSArg\_H*Arg*N:CaM:eNOS:Hsp90} + \\
&\quad \text{koffeNOSArg\_H*Arg:N:CaM:eNOS:Hsp90} + \text{kateNOS\_H*Arg:N:CaM:eNOS:Hsp90} ; \\
d(\text{Arg:N:CaM:eNOS:Hsp90})/dt &= \text{koffpAktHsp90*Arg:N:CaM:eNOS:Hsp90:pAkt} - \text{konCa2C*Ca*Ca*Arg:N:CaM:eNOS:Hsp90} + \\
&\quad \text{koffCa2C*Arg:CN:CaM:eNOS:Hsp90} + \text{kon2NeNOS\_H*N:CaM*Arg:eNOS:Hsp90} - \\
&\quad \text{koffCaMeNOS\_H*Arg:N:CaM:eNOS:Hsp90} - \text{konpAktHsp90*Arg:N:CaM:eNOS:Hsp90*pAkt} + \\
&\quad \text{koneNOSArg\_H*Arg*N:CaM:eNOS:Hsp90} - \text{koffeNOSArg\_H*Arg:N:CaM:eNOS:Hsp90} - \\
&\quad \text{kateNOS\_H*Arg:N:CaM:eNOS:Hsp90} ; \\
d(\text{CN:CaM:eNOS:Hsp90})/dt &= \text{koffpAktHsp90*CN:CaM:eNOS:Hsp90:pAkt} + \text{konCa2C*Ca*Ca*N:CaM:eNOS:Hsp90} - \\
&\quad \text{koffCa2C*CN:CaM:eNOS:Hsp90} + \text{konCa2N*Ca*Ca*C:CaM:eNOS:Hsp90} - \text{koffCa2N*CN:CaM:eNOS:Hsp90} + \\
&\quad \text{kon4eNOS\_H*CN:CaM*eNOS:Hsp90} - \text{koffCaMeNOS\_H*CN:CaM:eNOS:Hsp90} - \\
&\quad \text{konpAktHsp90*CN:CaM:eNOS:Hsp90*pAkt} - \text{koneNOSArg\_H*Arg*CN:CaM:eNOS:Hsp90} + \\
&\quad \text{koffeNOSArg\_H*Arg:CN:CaM:eNOS:Hsp90} + \text{kateNOS\_H*Arg:CN:CaM:eNOS:Hsp90} ; \\
d(\text{Arg:CN:CaM:eNOS:Hsp90})/dt &= \text{koffpAktHsp90*Arg:CN:CaM:eNOS:Hsp90:pAkt} + \text{konCa2C*Ca*Ca*Arg:N:CaM:eNOS:Hsp90} - \\
&\quad \text{koffCa2C*Arg:CN:CaM:eNOS:Hsp90} + \text{konCa2N*Ca*Ca*Arg:C:CaM:eNOS:Hsp90} - \\
&\quad \text{koffCa2N*Arg:CN:CaM:eNOS:Hsp90} + \text{kon4eNOS\_H*CN:CaM*Arg:eNOS:Hsp90} - \\
&\quad \text{koffCaMeNOS\_H*Arg:CN:CaM:eNOS:Hsp90} - \text{konpAktHsp90*Arg:CN:CaM:eNOS:Hsp90*pAkt} + \\
&\quad \text{koneNOSArg\_H*Arg*CN:CaM:eNOS:Hsp90} - \text{koffeNOSArg\_H*Arg:CN:CaM:eNOS:Hsp90} - \\
&\quad \text{kateNOS\_H*Arg:CN:CaM:eNOS:Hsp90} ; \\
d(\text{Akt:eNOS})/dt &= \text{koffHsp90eNOS*eNOS:pHsp90:Akt} - \text{kon2CpeNOS*C:CaM*Akt:eNOS} + \text{koffCaMpeNOS*C:CaM:eNOS:Akt} - \\
&\quad \text{kon2NpeNOS*N:CaM*Akt:eNOS} + \text{koffCaMpeNOS*N:CaM:eNOS:Akt} - \text{kon4peNOS*CN:CaM*Akt:eNOS} + \\
&\quad \text{koffCaMpeNOS*CN:CaM:eNOS:Hsp90:Akt} - \text{konHsp90eNOS*Akt:eNOS*pHsp90} - \text{konbeNOSArg*Arg*Akt:eNOS} + \\
&\quad \text{koffbeNOSArg*Arg:Akt:eNOS} ; \\
d(\text{Arg:Akt:eNOS})/dt &= \text{koffHsp90eNOS*Arg:eNOS:pHsp90:Akt} - \text{kon2CpeNOS*C:CaM*Arg:Akt:eNOS} + \\
&\quad \text{koffCaMpeNOS*Arg:C:CaM:eNOS:Akt} - \text{kon2NpeNOS*N:CaM*Arg:Akt:eNOS} + \text{koffCaMpeNOS*Arg:N:CaM:eNOS:Akt} \\
&\quad - \text{kon4peNOS*CN:CaM*Arg:Akt:eNOS} + \text{koffCaMpeNOS*Arg:CN:CaM:eNOS:Hsp90:Akt} - \\
&\quad \text{konHsp90eNOS*Arg:Akt:eNOS*pHsp90} + \text{konbeNOSArg*Arg*Akt:eNOS} - \text{koffbeNOSArg*Arg:Akt:eNOS} ; \\
d(\text{C:CaM:eNOS:Akt})/dt &= \text{koffHsp90\_CaMeNOS*C:CaM:eNOS:pHsp90:Akt} - \text{konCa2N*Ca*Ca*C:CaM:eNOS:Akt} + \\
&\quad \text{koffCa2N*CN:CaM:eNOS:Hsp90:Akt} + \text{kon2CpeNOS*C:CaM*Akt:eNOS} - \text{koffCaMpeNOS*C:CaM:eNOS:Akt} - \\
&\quad \text{konHsp90\_CaMeNOS*C:CaM:eNOS:Akt*pHsp90} - \text{koneNOSArg*Arg*C:CaM:eNOS:Akt} + \\
&\quad \text{koffeNOSArg*Arg:C:CaM:eNOS:Akt} + \text{kateNOS*Arg:C:CaM:eNOS:Akt} ; \\
d(\text{Arg:C:CaM:eNOS:Akt})/dt &= \text{koffHsp90\_CaMeNOS*Arg:C:CaM:eNOS:pHsp90:Akt} - \text{konCa2N*Ca*Ca*Arg:C:CaM:eNOS:Akt} + \\
&\quad \text{koffCa2N*Arg:CN:CaM:eNOS:Hsp90:Akt} + \text{kon2CpeNOS*C:CaM*Arg:Akt:eNOS} - \\
&\quad \text{koffCaMpeNOS*Arg:C:CaM:eNOS:Akt} - \text{konHsp90\_CaMeNOS*Arg:C:CaM:eNOS:Akt*pHsp90} + \\
&\quad \text{koneNOSArg*Arg*C:CaM:eNOS:Akt} - \text{koffeNOSArg*Arg:C:CaM:eNOS:Akt} - \text{kateNOS*Arg:C:CaM:eNOS:Akt} ; \\
d(\text{N:CaM:eNOS:Akt})/dt &= \text{koffHsp90\_CaMeNOS*N:CaM:eNOS:pHsp90:Akt} - \text{konCa2C*Ca*Ca*N:CaM:eNOS:Akt} + \\
&\quad \text{koffCa2C*CN:CaM:eNOS:Hsp90:Akt} + \text{kon2NpeNOS*N:CaM*Akt:eNOS} - \text{koffCaMpeNOS*N:CaM:eNOS:Akt} -
\end{aligned}$$

$$\begin{aligned}
& \text{konHsp90\_CaMeNOS}^* \text{N:CaM:eNOS:Akt}^* \text{pHsp90} - \text{koneNOSArg}^* \text{Arg}^* \text{N:CaM:eNOS:Akt} + \\
& \text{koffeNOSArg}^* \text{Arg:N:CaM:eNOS:Akt} + \text{kcateNOS}^* \text{Arg:N:CaM:eNOS:Akt} ; \\
d(\text{Arg:N:CaM:eNOS:Akt})/dt = & \text{koffHsp90\_CaMeNOS}^* \text{Arg:N:CaM:eNOS:pHsp90:Akt} - \text{konCa2C}^* \text{Ca}^* \text{Ca}^* \text{Arg:N:CaM:eNOS:Akt} + \\
& \text{koffCa2C}^* \text{Arg:CN:CaM:eNOS:Hsp90:Akt} + \text{kon2NpeNOS}^* \text{N:CaM}^* \text{Arg:Akt:eNOS} - \\
& \text{koffCaMpeNOS}^* \text{Arg:N:CaM:eNOS:Akt} - \text{konHsp90\_CaMeNOS}^* \text{Arg:N:CaM:eNOS:Akt}^* \text{pHsp90} + \\
& \text{koneNOSArg}^* \text{Arg}^* \text{N:CaM:eNOS:Akt} - \text{koffeNOSArg}^* \text{Arg:N:CaM:eNOS:Akt} - \text{kcateNOS}^* \text{Arg:N:CaM:eNOS:Akt} ; \\
d(\text{CN:CaM:eNOS:Hsp90:Akt})/dt = & \text{koffHsp90\_CaMeNOS}^* \text{CN:CaM:eNOS:pHsp90:Akt} + \text{konCa2C}^* \text{Ca}^* \text{Ca}^* \text{N:CaM:eNOS:Akt} - \\
& \text{koffCa2C}^* \text{CN:CaM:eNOS:Hsp90:Akt} + \text{konCa2N}^* \text{Ca}^* \text{Ca}^* \text{C:CaM:eNOS:Akt} - \text{koffCa2N}^* \text{CN:CaM:eNOS:Hsp90:Akt} + \\
& \text{kon4peNOS}^* \text{CN:CaM}^* \text{Akt:eNOS} - \text{koffCaMpeNOS}^* \text{CN:CaM:eNOS:Hsp90:Akt} - \\
& \text{konHsp90\_CaMeNOS}^* \text{CN:CaM:eNOS:Hsp90:Akt}^* \text{pHsp90} - \text{koneNOSArg}^* \text{Arg}^* \text{CN:CaM:eNOS:Hsp90:Akt} + \\
& \text{koffeNOSArg}^* \text{Arg:CN:CaM:eNOS:Hsp90:Akt} + \text{kcateNOS}^* \text{Arg:CN:CaM:eNOS:Hsp90:Akt} ; \\
d(\text{Arg:CN:CaM:eNOS:Hsp90:Akt})/dt = & \text{koffHsp90\_CaMeNOS}^* \text{Arg:CN:CaM:eNOS:pHsp90:Akt} + \\
& \text{konCa2C}^* \text{Ca}^* \text{Ca}^* \text{Arg:N:CaM:eNOS:Akt} - \text{koffCa2C}^* \text{Arg:CN:CaM:eNOS:Hsp90:Akt} + \\
& \text{konCa2N}^* \text{Ca}^* \text{Ca}^* \text{Arg:C:CaM:eNOS:Akt} - \text{koffCa2N}^* \text{Arg:CN:CaM:eNOS:Hsp90:Akt} + \\
& \text{kon4peNOS}^* \text{CN:CaM}^* \text{Arg:Akt:eNOS} - \text{koffCaMpeNOS}^* \text{Arg:CN:CaM:eNOS:Hsp90:Akt} - \\
& \text{konHsp90\_CaMeNOS}^* \text{Arg:CN:CaM:eNOS:Hsp90:Akt}^* \text{pHsp90} + \text{koneNOSArg}^* \text{Arg}^* \text{CN:CaM:eNOS:Hsp90:Akt} - \\
& \text{koffeNOSArg}^* \text{Arg:CN:CaM:eNOS:Hsp90:Akt} - \text{kcateNOS}^* \text{Arg:CN:CaM:eNOS:Hsp90:Akt} ;
\end{aligned}$$

## species used as place holders (2)

$$\begin{aligned}
d(\text{Trash})/dt = & \text{kdegVEGF}^* \text{TSP1:VEGF} + \text{kdegR2}^* \text{R2cyt} + \text{kdegCD47}^* \text{CD47cyt} + \text{kdegR2}^* \text{VEGF:R2cyt} + \\
& \text{kdegCD47}^* \text{TSP1:CD47cyt} + \text{kdegCD47}^* \text{CD47:R2cyt} + \text{kdegR2}^* \text{VEGF:pR2cyt} + \text{kdegpR2}^* \text{VEGF:pR2cyt} + \\
& \text{kdegCD47}^* \text{VEGF:R2.CD47cyt} + \text{kdegpR2CD47}^* \text{VEGF:pR2:CD47cyt} + \text{kdegIP3}^* \text{IP3} + \\
& \text{kdegpeNOS}^* \text{C:CaM:peNOS} + \text{kdegpeNOS}^* \text{N:CaM:peNOS} + \text{kdegpeNOS}^* \text{CN:CaM:peNOS} + \\
& \text{kdegpeNOS}^* \text{peNOS} ;
\end{aligned}$$

$$d(\text{null})/dt = 0$$
