# Supplementary material for: Mathematical Model Predicts Effective Strategies to Inhibit VEGF-eNOS Signaling
Source: MDPI journal article supplement (doi:10.3390/jcm9051255), 2020-04-26
Supplement: s1 [file s1]

```

begin model
#all units in nM/min
begin molecule types

Trash()
null()
R2(VEGF,CD47,Y1175~U~P,loc~mem~cyt,Src)
CD47(TSP1,R2,loc~mem~cyt)
TSP1(CD47,VEGF)
VEGF(R2,TSP1)
Src(R2,Hsp90,Y~U~P,Akt)
Hsp90(Src,Akt,Y300~U~P,eNOS)
Akt(Hsp90,eNOS,T~U~P,Src)
eNOS(CaM,Hsp90,S1177~U~P,Arg,Akt)
Arg(eNOS)
NO()
Cit()
PI(Plsite~3P~4P)
PLCg(Yplc~Y~P)
Istim()
Ca(CaM)
CaM(C,N,eNOS)
IP3()
Castore()
NObuffer()
sGC_b()
sGC_6c()
sGC_5c()
sGC_5c_NO()
sGC_NO()
sGC()
GTP()
cGMP()
PDE()
cGMP_PDE()
cGMP_PDE_a()
GMP()

```

end molecule types

```

#####
#####
#####

```

begin observables

|           |              |                              |
|-----------|--------------|------------------------------|
| Molecules | Trash_tot    | Trash                        |
| Molecules | null_tot     | null                         |
| Molecules | totR2        | R2                           |
| Molecules | totR2_mem    | R2(loc~mem)                  |
| Molecules | totR2_cyt    | R2(loc~cyt)                  |
| Molecules | totpR2       | R2(Y1175~P)                  |
| Molecules | tot_R2_bound | R2(VEGF!1).VEGF(R2!1)        |
| Molecules | CD47TSP1     | CD47(R2,TSP1!2).TSP1(CD47!2) |
| Molecules | totCD47      | CD47()                       |
| Molecules | totSrc       | Src()                        |
| Molecules | pSrc         | Src(Y~P)                     |
| Molecules | totAkt       | Akt()                        |

|           |               |               |
|-----------|---------------|---------------|
| Molecules | pAkt          | Akt(T~P)      |
| Molecules | toteNOS       | eNOS()        |
| Molecules | peNOS         | eNOS(S1177~P) |
| Molecules | yPLCg         | PLCg(Yplc~Y)  |
| Molecules | loopenstim    | Istim()       |
| Molecules | freepip2      | PI(Plsite~3P) |
| Molecules | tot_Cac       | Ca()          |
| Molecules | freeCac       | Ca(CaM)       |
| Molecules | IP3_ob        | IP3()         |
| Molecules | CaER          | Castore       |
| Molecules | Cit_prod      | Cit()         |
| Molecules | NO_ob         | NO()          |
| Molecules | active_sGC    | sGC_5c()      |
| Molecules | free_GTP      | GTP()         |
| Molecules | cGMP_ob       | cGMP()        |
| Molecules | PDE_ob        | PDE()         |
| Molecules | cGMP_PDE_ob   | cGMP_PDE()    |
| Molecules | cGMP_PDE_a_ob | cGMP_PDE_a()  |
| Molecules | totPLCg       | PLCg()        |
| Molecules | pPLCg         | PLCg(Yplc~P)  |

end observables

```
#####
#####
#####
```

begin parameters

```
##### TSP1-VEGF #####
```

|                |         |                             |
|----------------|---------|-----------------------------|
| kon_TSP1_VEGF  | 0.03    | #/nM-min                    |
| koff_TSP1_VEGF | 0.3     | #/min                       |
| kdeg_VEGF      | 0.0116  | #/min TSP1:VEGF degradation |
| konR2          | 0.6     | # /nM-min                   |
| koffR2         | 0.09    | # /min                      |
| konTSP1CD47    | 0.03    | #                           |
| koffTSP1CD47   | 0.0003  |                             |
| konR2CD47      | 0.0011  |                             |
| koffR2CD47     | 0.06    |                             |
| kinterR2       | 0.0426  |                             |
| kinterpR2      | 4.7682  |                             |
| kinterCD47     | 0.5692  |                             |
| kinterR2_CD47  | 0.0085  |                             |
| kinterpR2_CD47 | 23.8410 |                             |
| kinterTSP1bd   | 0.5692  |                             |
| kpR2           | 0.6     |                             |
| kdpR2          | 0.06    |                             |
| kdpR2CD47bd    | 0.01    |                             |
| ksynR2         | 0.0482  |                             |
| ksynCD47       | 0.0899  |                             |
| kdegR2         | 0.0126  |                             |
| kdegpR2        | 0.2219  |                             |
| kdegpR2_CD47   | 0.0168  |                             |
| kdegCD47       | 0.0063  |                             |
| kdegR2TSP1bd   | 0.0168  |                             |
| konSrc_pR2     | 0.06    |                             |
| koffSrc_pR2    | 25      |                             |
| kp_Src         | 20      |                             |
| kdp_Src        | 0.4     |                             |
| konSrc_Hsp90   | 0.5     |                             |

|                 |                   |             |
|-----------------|-------------------|-------------|
| koffSrc_Hsp90   | 0.5               |             |
| kp_Hsp90        | 30                |             |
| kdp_Hsp90       | 0.01              |             |
| konSrc_Akt      | 0.06              |             |
| koffSrc_Akt     | 30                |             |
| kp_Akt          | 3                 |             |
| kdp_Akt         | 0.1               |             |
| kpPLCg          | 10                |             |
| kdpPLCg         | 0.3               |             |
| kmPIP2PLCg      | 193.585826        |             |
| nIP3            | 1                 |             |
| kcatPLCgDAG     | 0.3               |             |
| kdeg_ip3        | 0.02              |             |
| kPIP2gen        | 10                |             |
| ICrac           | 1.5e-9            |             |
| Kcrac           | 2492.5441         |             |
| tau_stim        | 1                 |             |
| kmPLCgR2        | 8e3               |             |
| ncrac           | 0.6580            |             |
| lip3Ramp        | 0.3910            |             |
| KmIP3R          | 20000             |             |
| I_PMCA          | 220418.474925993  |             |
| KmPMCA          | 260               |             |
| Caext           | 2000e3            |             |
| I_SERCA         | 435320.5900000000 |             |
| KleakER         | 6.8022e-9         |             |
| KmSERCA         | 0.15e3            |             |
| KiCa            | 1e3               |             |
| CSQN_total      | 15000e3           |             |
| KCSQN           | 800e3             |             |
| Volcyto         | 9.12E-13          |             |
| Voext           | 0.0005            |             |
| VolER           | 3.35E-13          |             |
| konCa2C         | 0.240             | #/ (nM*min) |
| koffCa2C        | 555               | #/min       |
| konCa2N         | 6                 | #/ (nM*min) |
| koffCa2N        | 4.5e4             | #/min       |
| kon2NeNOS       | 0.0081            |             |
| kon2CeNOS       | 0.078             |             |
| kon4eNOS        | 0.078             |             |
| koffCaMeNOS     | 0.6               |             |
| kon2NeNOS_H     | 0.0081/0.249      |             |
| kon2CeNOS_H     | 0.078/0.249       |             |
| kon4eNOS_H      | 0.078/0.249       |             |
| koffCaMeNOS_H   | 0.6               |             |
| kon2NpeNOS      | 0.0081/0.12       |             |
| kon2CpeNOS      | 0.078/0.12        |             |
| kon4peNOS       | 0.078/0.12        |             |
| koffCaMpeNOS    | 0.6               |             |
| kon2NpeNOS_H    | 0.0081/0.07       |             |
| kon2CpeNOS_H    | 0.078/0.07        |             |
| kon4peNOS_H     | 0.078/0.07        |             |
| koffCaMpeNOS_H  | 0.6               |             |
| konAkt_eNOS     | 0.02              |             |
| koffAkt_eNOS    | 4.038             |             |
| konpAkt_pHsp90  | 0.5               |             |
| koffpAkt_pHsp90 | 10.2826           |             |

|                   |         |  |
|-------------------|---------|--|
| konHsp90_eNOS     | 0.5     |  |
| koffHsp90_eNOS    | 5.7327  |  |
| konHsp90_CaMeNOS  | 0.5     |  |
| koffHsp90_CaMeNOS | 10.0976 |  |
| kcat_pAkt         | 3       |  |
| kcat_pAkt_H       | 10      |  |
| kdp_eNOS          | 3.5     |  |
| kdeg_eNOS         | 0.02    |  |
| kon_beNOS_Arg     | 0.048   |  |
| koff_beNOS_Arg    | 96      |  |
| kon_eNOS_Arg      | 0.048   |  |
| koff_eNOS_Arg     | 2.9023  |  |
| kon_peNOS_Arg     | 0.048   |  |
| koff_peNOS_Arg    | 4.9891  |  |
| kon_eNOS_Arg_H    | 0.048   |  |
| koff_eNOS_Arg_H   | 6.987   |  |
| kon_peNOS_Arg_H   | 0.048   |  |
| koff_peNOS_Arg_H  | 10.8397 |  |
| kcat_eNOS         | 1.49    |  |
| kcat_peNOS        | 2.6820  |  |
| kcat_eNOS_H       | 3.132   |  |
| kcat_peNOS_H      | 4.22    |  |
| kclearNO          | 10      |  |
| kon1              | 18      |  |
| koff1             | 360     |  |
| kon2              | 1680    |  |
| koff2             | 1680    |  |
| kon3              | 0.24    |  |
| koff3             | 60000   |  |
| kon4              | 120000  |  |
| koff4             | 0.108   |  |
| kon5              | 24      |  |
| koff5             | 0.044   |  |
| kon6              | 60      |  |
| koff6             | 0.06    |  |
| kcat_sGC          | 31.5    |  |
| kp1               | 0.001   |  |
| kdp1              | 7.752   |  |
| kp2               | 18      |  |
| kdp2              | 7.2     |  |
| Kp1               | 4e3     |  |
| Vp2               | 0.2925  |  |
| Kp2               | 1e3     |  |
|                   |         |  |
| TSP1_0            | 0       |  |
| VEGF_0            | 0       |  |
| R2_0              | 8.971   |  |
| CD47_0            | 199.336 |  |
| Src_0             | 344     |  |
| Ca_0              | 50      |  |
| Ca_store_0        | 2e6     |  |
| CaM_0             | 30      |  |
| eNOS_0            | 100     |  |
| Arg_0             | 100000  |  |
| Hsp90_0           | 500     |  |
| Akt_0             | 800     |  |
| sGC_b_0           | 10      |  |
| GTP_0             | 500000  |  |

```

PIP2_0                200000
PLCg_0                 500
Istim0                 19990.3745
PDE_0                  5e5

```

```

#####
RprodGMP      Vp2*0.05*(PDE_ob+cGMP_PDE_ob)/(Kp1+cGMP_ob) + Vp2*(cGMP_PDE_a_ob)/(Kp2+cGMP_ob) #
#####
RF1            kpPLCg/(kmPLCgR2+yPLCg)
RF2      kcatPLCgDAG*freepip2^nIP3/(kmPIP2PLCg^nIP3+freepip2^nIP3)
RF3            ((Volext/Volcyto)*Caext-freeCac)*ICrac*(Kcrac^ncrac/(Kcrac^ncrac+CaER^ncrac))/tau_stim-
loopenstim/tau_stim # #added (Caext-freeCac)
RF4            (VolER/Volcyto)*lip3Ramp*(CaER-
freeCac)*((IP3_ob)^3.8/((IP3_ob)^3.8+KmIP3R^3.8))*(KiCa^3.8/(KiCa^3.8+freeCac^3.8))
RF5      -I_PMCA*freeCac^1.4/(KmPMCA^1.4+freeCac^1.4) + loopenstim
RF6            -I_SERCA*(freeCac/(KmSERCA+freeCac))^2 + KleakER*(CaER-freeCac)^2 # SERCA pump
RF7            -lip3Ramp*(CaER-freeCac)*(IP3_ob^3.8/(IP3_ob^3.8+KmIP3R^3.8))*(KiCa^3.8/(KiCa^3.8+freeCac^3.8))*
( 1/(1+CSQN_total/(KCSQN+CaER)^2) ) # CICR. CSQN: calsequestration (ER calcium buffer)
RF8            I_SERCA*(freeCac/(KmSERCA+freeCac))^2*(Volcyto/VolER)*(1/(1+CSQN_total/(KCSQN+CaER)^2)) # SERCA
pump
RF9            -KleakER*(Volcyto/VolER)*((CaER-freeCac)^2)*(1/(1+CSQN_total/(KCSQN+CaER)^2))

```

end parameters

```

#####
#####
#####

```

begin seed species

#dummy variable

```

Trash()              0
null()               1

TSP1(CD47,VEGF)      TSP1_0
VEGF(R2,TSP1)        VEGF_0
R2(VEGF,CD47,Y1175~U,loc~mem,Src)  R2_0
CD47(TSP1,R2,loc~mem)  CD47_0
Src(R2,Hsp90,Y~U,Akt)  Src_0
Hsp90(Src,Akt,Y300~U,eNOS)  Hsp90_0
Akt(Hsp90,T~U,eNOS,Src)  Akt_0
eNOS(CaM,Hsp90,S1177~U,Arg,Akt)  eNOS_0
Ca(CaM)              Ca_0
CaM(C,N,eNOS)        CaM_0
Arg(eNOS)            Arg_0
sGC_b()              sGC_b_0
GTP()                GTP_0
NObuffer()           0
PI(Pisite~3P)        PIP2_0
PLCg(Yplc~Y)         PLCg_0
Istim()              Istim0
Castore()            Ca_store_0
PDE()                PDE_0

```

end seed species

```

#####
#####
#####

```

begin reaction rules

##### START receptor MODULE #####

### TSP1 VEGF binding, VEGF can bind to TSP1

TSP1(CD47,VEGF) + VEGF(R2,TSP1) <-> TSP1(CD47,VEGF!1).VEGF(TSP1!1,R2) kon\_TSP1\_VEGF, koff\_TSP1\_VEGF  
TSP1(CD47,VEGF!1).VEGF(TSP1!1,R2) -> Trash() kdeg\_VEGF #from Li and Finley

### receptor-ligand binding

VEGF(R2,TSP1) + R2(VEGF,Y1175~U,loc~mem,Src,CD47) <-> VEGF(R2!1,TSP1).R2(VEGF!1,Y1175~U,loc~mem,Src,CD47)  
konR2,koffR2

VEGF(R2,TSP1) + R2(VEGF,Y1175~U,loc~mem,Src,CD47!1).CD47(TSP1,R2!1) <->  
VEGF(R2!2,TSP1).R2(VEGF!2,Y1175~U,loc~mem,Src,CD47!1).CD47(TSP1,R2!1) konR2,koffR2

# TSP1 only binds to CD47 not bound to R2

TSP1(CD47,VEGF) + CD47(TSP1,loc~mem,R2) <-> TSP1(CD47!1,VEGF).CD47(TSP1!1,loc~mem,R2)  
konTSP1CD47,koffTSP1CD47

### receptor coupling

# R2 only couples with CD47 without TSP1

R2(CD47,loc~mem) + CD47(R2,loc~mem,TSP1) <-> R2(CD47!2,loc~mem).CD47(R2!2,loc~mem,TSP1)  
konR2CD47,koffR2CD47

### receptor internalization - depends on R2 phosphorylation and TSP1 binding only.

R2(CD47,Y1175~U,loc~mem,Src) -> R2(CD47,Y1175~U,loc~cyt,Src) kinterR2  
R2(CD47,Y1175~P,loc~mem,Src) -> R2(CD47,Y1175~P,loc~cyt,Src) kinterpR2  
R2(CD47!1,Y1175~U,loc~mem,Src).CD47(TSP1,R2!1,loc~mem) -> R2(CD47!1,Y1175~U,loc~cyt,Src).CD47(TSP1,R2!1,loc~cyt)  
kinterR2\_CD47  
R2(CD47!1,Y1175~P,loc~mem,Src).CD47(TSP1,R2!1,loc~mem) -> R2(CD47!1,Y1175~P,loc~cyt,Src).CD47(TSP1,R2!1,loc~cyt)  
kinterpR2\_CD47

CD47(TSP1,R2,loc~mem) -> CD47(TSP1,R2,loc~cyt) kinterCD47  
CD47(TSP1!1,R2,loc~mem).TSP1(CD47!1,VEGF) -> CD47(TSP1!1,R2,loc~cyt).TSP1(CD47!1,VEGF) kinterTSP1bd

### R2 phosphorylation and dephosphorylation

VEGF(R2!1,TSP1).R2(VEGF!1,CD47,Y1175~U,Src) <-> VEGF(R2!1,TSP1).R2(VEGF!1,CD47,Y1175~P,Src) kpR2,kdpR2  
VEGF(R2!1,TSP1).R2(VEGF!1,CD47!2,Y1175~U,Src).CD47(TSP1,R2!2) <->  
VEGF(R2!1,TSP1).R2(VEGF!1,CD47!2,Y1175~P,Src).CD47(TSP1,R2!2) kpR2,kdpR2CD47bd

### secretion/degradation - degradation depends on whether VEGF, CD47, or TSP1 is in complex - assuming phosphorylation affects degradation (Nguyen 2013)

null -> null + R2(VEGF,CD47,Y1175~U,loc~mem,Src) ksynR2  
null -> null + CD47(TSP1,R2,loc~mem) ksynCD47

R2(VEGF,CD47,loc~cyt,Src,Y1175~U) -> Trash() kdegR2  
VEGF(R2!1,TSP1).R2(VEGF!1,CD47,loc~cyt,Src) -> Trash() kdegR2 #VEGF:R2 or VEGF:pR2  
R2(VEGF,CD47,loc~cyt,Src,Y1175~P) -> Trash() kdegpR2 #VEGF:R2 or VEGF:pR2  
VEGF(R2!1,TSP1).R2(VEGF!1,CD47,loc~cyt,Src,Y1175~P) -> Trash() kdegpR2 #VEGF:R2 or VEGF:pR2  
R2(CD47!2,loc~cyt,Src,Y1175~P).CD47(TSP1,R2!2,loc~cyt) -> Trash() kdegpR2\_CD47 #VEGF:R2:CD47 or VEGF:pR2:CD47  
CD47(R2,loc~cyt) -> Trash() kdegCD47  
R2(CD47!2,loc~cyt,Src,Y1175~U).CD47(TSP1,R2!2,loc~cyt) -> Trash() kdegCD47

##### END receptor MODULE #####

##### START UPSTREAM MODULE #####

##internalized pR2 binds to uSrc

R2(Y1175~P,Src,loc~cyt) + Src(R2,Y~U) <-> R2(Y1175~P,Src!1,loc~cyt).Src(R2!1,Y~U) konSrc\_pR2,koffSrc\_pR2  
Src(R2!1,Y~U).R2(Y1175~P,Src!1,loc~cyt) -> Src(R2,Y~P) + R2(Y1175~P,Src,loc~cyt) kp\_Src  
Src(Y~P) -> Src(Y~U) kdp\_Src

```

#Hsp90 can associate with Src (whether Src is associated with R2 and phosphorylated)
Src(R2,Hsp90,Y~?) + Hsp90(Src,Akt,Y300~U,eNOS) <-> Src(R2,Hsp90!1,Y~?).Hsp90(Src!1,Akt,Y300~U,eNOS)
      konSrc_Hsp90,koffSrc_Hsp90
Src(R2,Hsp90!1,Y~P).Hsp90(Src!1,Akt,Y300~U,eNOS) -> Src(R2,Hsp90,Y~P) + Hsp90(Src,Akt,Y300~P,eNOS)    kp_Hsp90
Hsp90(Y300~P,eNOS) -> Hsp90(Y300~U,eNOS)    kdp_Hsp90

#free Akt is phosphorylated by Src
Src(R2,Hsp90,Y~?,Akt) + Akt(Hsp90,T~U,Src,eNOS) <-> Src(R2,Hsp90,Y~?,Akt!1).Akt(Hsp90,T~U,Src!1,eNOS)
      konSrc_Akt,koffSrc_Akt
Src(R2,Hsp90,Y~P,Akt!1).Akt(Hsp90,T~U,Src!1,eNOS) -> Src(R2,Hsp90,Y~P,Akt) + Akt(Hsp90,T~P,Src,eNOS)    kp_Akt
Akt(T~P,eNOS) -> Akt(T~U,eNOS)    kdp_Akt

##### END upstream module addition #####
##### START Ca module #####

PLCg(Yplc~Y) + R2(Y1175~P,loc~mem) -> PLCg(Yplc~P) + R2(Y1175~P,loc~mem)    RF1
PLCg(Yplc~Y) + R2(Y1175~P,loc~cyt) -> PLCg(Yplc~P) + R2(Y1175~P,loc~cyt)    RF1
PLCg(Yplc~P) -> PLCg(Yplc~Y)    kdpPLCg
PLCg(Yplc~P) + PI(Plsite~3P) -> IP3() + PLCg(Yplc~P)    RF2
null-> null+ PI(Plsite~3P)    kPIP2gen
IP3() -> Trash()    kdeg_ip3
null-> null+ Istim()    RF3
null-> null+ Ca(CaM)    RF4
null-> null+ Ca(CaM)    RF5
null-> null+ Ca(CaM)    RF6
null-> null+ Castore()    RF7
null-> null+ Castore()    RF8
null-> null+ Castore()    RF9

##### END Ca module #####
##### Start Hsp90 module #####
## M4 edit: allow CaM to bind to Arg-bound eNOS and Akt-bound eNOS
#### Ca binding to CaM, CaM activating eNOS
Ca(CaM) + Ca(CaM) + CaM(C,N,eNOS) <-> Ca(CaM!1).CaM(C!1,N,eNOS)    konCa2C,koffCa2C
Ca(CaM) + Ca(CaM) + CaM(C,N,eNOS) <-> Ca(CaM!1).CaM(C,N!1,eNOS)    konCa2N,koffCa2N

Ca(CaM) + Ca(CaM) + Ca(CaM!1).CaM(C,N!1,eNOS!?) <-> Ca(CaM!2).Ca(CaM!1).CaM(C!2,N!1,eNOS!?)    konCa2C,koffCa2C
Ca(CaM) + Ca(CaM) + Ca(CaM!1).CaM(C!1,N,eNOS!?) <-> Ca(CaM!2).Ca(CaM!1).CaM(C!1,N!2,eNOS!?)    konCa2N,koffCa2N

##this assumes only Ca-bound CaM can bind to eNOS
Ca(CaM!1).CaM(C!1,N,eNOS) + eNOS(CaM,Hsp90,S1177~U,Akt) <->
Ca(CaM!1).CaM(C!1,N,eNOS!2).eNOS(CaM!2,Hsp90,S1177~U,Akt)    kon2CeNOS,koffCaMeNOS
Ca(CaM!1).CaM(C,N!1,eNOS) + eNOS(CaM,Hsp90,S1177~U,Akt) <->
Ca(CaM!1).CaM(C,N!1,eNOS!2).eNOS(CaM!2,Hsp90,S1177~U,Akt)    kon2NeNOS,koffCaMeNOS
Ca(CaM!1).Ca(CaM!2).CaM(C!1,N!2,eNOS) + eNOS(CaM,Hsp90,S1177~U,Akt) <->
Ca(CaM!1).Ca(CaM!2).CaM(C!1,N!2,eNOS!3).eNOS(CaM!3,Hsp90,S1177~U,Akt)    kon4eNOS,koffCaMeNOS

Ca(CaM!1).CaM(C!1,N,eNOS) + eNOS(CaM,Hsp90!3,S1177~U,Akt).Hsp90(eNOS!3) <->
Ca(CaM!1).CaM(C!1,N,eNOS!2).eNOS(CaM!2,Hsp90!3,S1177~U,Akt).Hsp90(eNOS!3)    kon2CeNOS_H,koffCaMeNOS_H
Ca(CaM!1).CaM(C,N!1,eNOS) + eNOS(CaM,Hsp90!3,S1177~U,Akt).Hsp90(eNOS!3) <->
Ca(CaM!1).CaM(C,N!1,eNOS!2).eNOS(CaM!2,Hsp90!3,S1177~U,Akt).Hsp90(eNOS!3)    kon2NeNOS_H,koffCaMeNOS_H
Ca(CaM!1).Ca(CaM!2).CaM(C!1,N!2,eNOS) + eNOS(CaM,Hsp90!3,S1177~U,Akt).Hsp90(eNOS!3) <->
Ca(CaM!1).Ca(CaM!2).CaM(C!1,N!2,eNOS!3).eNOS(CaM!3,Hsp90!4,S1177~U,Akt).Hsp90(eNOS!4)
      kon4eNOS_H,koffCaMeNOS_H

```

```

Ca(CaM!1).CaM(C!1,N,eNOS) + eNOS(CaM,Hsp90,S1177~P,Akt) <->
Ca(CaM!1).CaM(C!1,N,eNOS!2).eNOS(CaM!2,Hsp90,S1177~P,Akt) kon2CpeNOS,koffCaMpeNOS
Ca(CaM!1).CaM(C,N!1,eNOS) + eNOS(CaM,Hsp90,S1177~P,Akt) <->
Ca(CaM!1).CaM(C,N!1,eNOS!2).eNOS(CaM!2,Hsp90,S1177~P,Akt) kon2NpeNOS,koffCaMpeNOS
Ca(CaM!1).Ca(CaM!2).CaM(C!1,N!2,eNOS) + eNOS(CaM,Hsp90,S1177~P,Akt) <->
Ca(CaM!1).Ca(CaM!2).CaM(C!1,N!2,eNOS!3).eNOS(CaM!3,Hsp90,S1177~P,Akt) kon4peNOS,koffCaMpeNOS

Ca(CaM!1).CaM(C!1,N,eNOS) + eNOS(CaM,Hsp90!3,S1177~P,Akt).Hsp90(eNOS!3) <->
Ca(CaM!1).CaM(C!1,N,eNOS!2).eNOS(CaM!2,Hsp90!3,S1177~P,Akt).Hsp90(eNOS!3) kon2CpeNOS_H,koffCaMpeNOS_H
Ca(CaM!1).CaM(C,N!1,eNOS) + eNOS(CaM,Hsp90!3,S1177~P,Akt).Hsp90(eNOS!3) <->
Ca(CaM!1).CaM(C,N!1,eNOS!2).eNOS(CaM!2,Hsp90!3,S1177~P,Akt).Hsp90(eNOS!3) kon2NpeNOS_H,koffCaMpeNOS_H
Ca(CaM!1).Ca(CaM!2).CaM(C!1,N!2,eNOS) + eNOS(CaM,Hsp90!3,S1177~P,Akt).Hsp90(eNOS!3) <->
Ca(CaM!1).Ca(CaM!2).CaM(C!1,N!2,eNOS!3).eNOS(CaM!3,Hsp90!4,S1177~P,Akt).Hsp90(eNOS!4)
kon4peNOS_H,koffCaMpeNOS_H

Ca(CaM!1).CaM(C!1,N,eNOS) + eNOS(CaM,Akt!1,Hsp90,S1177~U).Akt(eNOS!1,Hsp90) <->
Ca(CaM!1).CaM(C!1,N,eNOS!2).eNOS(CaM!2,Akt!3,Hsp90,S1177~U).Akt(eNOS!3,Hsp90) kon2CpeNOS,koffCaMpeNOS
Ca(CaM!1).CaM(C,N!1,eNOS) + eNOS(CaM,Akt!1,Hsp90,S1177~U).Akt(eNOS!1,Hsp90) <->
Ca(CaM!1).CaM(C,N!1,eNOS!2).eNOS(CaM!2,Akt!3,Hsp90,S1177~U).Akt(eNOS!3,Hsp90) kon2NpeNOS,koffCaMpeNOS
Ca(CaM!1).Ca(CaM!2).CaM(C!1,N!2,eNOS) + eNOS(CaM,Akt!1,Hsp90,S1177~U).Akt(eNOS!1,Hsp90) <->
Ca(CaM!1).Ca(CaM!2).CaM(C!1,N!2,eNOS!3).eNOS(CaM!3,Akt!4,Hsp90,S1177~U).Akt(eNOS!4,Hsp90)
kon4peNOS,koffCaMpeNOS

Ca(CaM!1).CaM(C!1,N,eNOS) + eNOS(CaM,Akt,Hsp90!1,S1177~U).Hsp90(eNOS!1,Akt!2,Y300~P).Akt(Hsp90!2,eNOS) <->
Ca(CaM!1).CaM(C!1,N,eNOS!2).eNOS(CaM!2,Akt,Hsp90!3,S1177~U).Hsp90(eNOS!3,Akt!4,Y300~P).Akt(Hsp90!4,eNOS)
kon2CpeNOS_H,koffCaMpeNOS_H
Ca(CaM!1).CaM(C,N!1,eNOS) + eNOS(CaM,Akt,Hsp90!1,S1177~U).Hsp90(eNOS!1,Akt!2,Y300~P).Akt(Hsp90!2,eNOS) <->
Ca(CaM!1).CaM(C,N!1,eNOS!2).eNOS(CaM!2,Akt,Hsp90!3,S1177~U).Hsp90(eNOS!3,Akt!4,Y300~P).Akt(Hsp90!4,eNOS)
kon2NpeNOS_H,koffCaMpeNOS_H
Ca(CaM!1).Ca(CaM!2).CaM(C!1,N!2,eNOS) +
eNOS(CaM,Akt,Hsp90!1,S1177~U).Hsp90(eNOS!1,Akt!2,Y300~P).Akt(Hsp90!2,eNOS) <->
Ca(CaM!1).Ca(CaM!2).CaM(C!1,N!2,eNOS!3).eNOS(CaM!3,Akt,Hsp90!4,S1177~U).Hsp90(eNOS!4,Akt!5,Y300~P).Akt(Hsp90!5,eN
OS) kon4peNOS_H,koffCaMpeNOS_H

#### both Akt and eNOS preferentially binds to Hsp90. Hsp90 binding docks Akt and eNOS; increases CaM affinity to eNOS
#if peNOS will not bind to Akt again
eNOS(CaM,Akt,Hsp90) + Hsp90(Akt,eNOS,Y300~P) <-> eNOS(CaM,Akt,Hsp90!1).Hsp90(Akt,eNOS!1,Y300~P)
konHsp90_eNOS,koffHsp90_eNOS
CaM(eNOS!1).eNOS(CaM!1,Akt,Hsp90) + Hsp90(Akt,eNOS,Y300~P) <->
CaM(eNOS!1).eNOS(CaM!1,Akt,Hsp90!2).Hsp90(Akt,eNOS!2,Y300~P)
konHsp90_CaMeNOS,koffHsp90_CaMeNOS
eNOS(Akt,Hsp90,S1177~U) + Akt(Hsp90,eNOS,T~P) <-> eNOS(Akt!1,Hsp90,S1177~U).Akt(eNOS!1,Hsp90,T~P)
konAkt_eNOS,koffAkt_eNOS
Akt(Hsp90,eNOS,T~P) + Hsp90(Akt,eNOS,Y300~P) <-> Akt(Hsp90!1,eNOS,T~P).Hsp90(Akt!1,eNOS,Y300~P)
konpAkt_pHsp90,koffpAkt_pHsp90

####assume Akt:Hsp90 complex is active (Akt and Hsp90 can be unphosphorylated)
eNOS(CaM,Akt,Hsp90,S1177~U) + Akt(Hsp90!1,eNOS).Hsp90(Akt!1,eNOS) <->
eNOS(CaM,Akt,Hsp90!1,S1177~U).Hsp90(eNOS!1,Akt!2).Akt(Hsp90!2,eNOS) konHsp90_eNOS,koffHsp90_eNOS
eNOS(Akt,Hsp90!1,S1177~U).Hsp90(eNOS!1,Akt) + Akt(Hsp90,eNOS,T~P) <->
eNOS(Akt,Hsp90!1,S1177~U).Hsp90(eNOS!1,Akt!2).Akt(Hsp90!2,eNOS,T~P) konpAkt_pHsp90,koffpAkt_pHsp90
eNOS(CaM,Akt!1,Hsp90,S1177~U).Akt(eNOS!1,Hsp90) + Hsp90(Akt,eNOS,Y300~P) <->
eNOS(CaM,Akt,Hsp90!1,S1177~U).Hsp90(eNOS!1,Akt!2,Y300~P).Akt(Hsp90!2,eNOS) konHsp90_eNOS,koffHsp90_eNOS

CaM(eNOS!3).eNOS(CaM!3,Akt!1,Hsp90,S1177~U).Akt(eNOS!1,Hsp90) + Hsp90(Akt,eNOS,Y300~P) <->
CaM(eNOS!3).eNOS(CaM!3,Akt,Hsp90!1,S1177~U).Hsp90(eNOS!1,Akt!2,Y300~P).Akt(Hsp90!2,eNOS)
konHsp90_CaMeNOS,koffHsp90_CaMeNOS

```

```

CaM(eNOS!3).eNOS(CaM!3,Akt,Hsp90,S1177~U) + Akt(Hsp90!1,eNOS).Hsp90(Akt!1,eNOS) <->
CaM(eNOS!3).eNOS(CaM!3,Akt,Hsp90!1,S1177~U).Hsp90(eNOS!1,Akt!2).Akt(Hsp90!2,eNOS)
konHsp90_CaMeNOS,koffHsp90_CaMeNOS

#only CaM-bound eNOS can be phosphorylated
CaM(eNOS!1).eNOS(CaM!1,S1177~U,Hsp90,Akt!2).Akt(Hsp90,eNOS!2,T~P) -> CaM(eNOS!1).eNOS(CaM!1,S1177~P,Hsp90,Akt) +
Akt(Hsp90,eNOS,T~P) kcat_pAkt
CaM(eNOS!1).eNOS(CaM!1,S1177~U,Hsp90!2,Akt).Akt(Hsp90!3,eNOS,T~P).Hsp90(eNOS!2,Akt!3,Y300~P) ->
CaM(eNOS!1).eNOS(CaM!1,S1177~P,Hsp90!2,Akt).Hsp90(eNOS!2,Akt,Y300~P) + Akt(Hsp90,eNOS,T~P)
kcat_pAkt_H

# all peNOS forms have a dephosphorylation rate
eNOS(S1177~P) -> eNOS(S1177~U) kdp_eNOS

# without Hsp90 present, peNOS is also subject to a degradation rate.
# eNOS unphosphorylated does not have a kdeg bc it doesnt have a ksyn. implicit balance b/w deg and syn here.
eNOS(S1177~P,Hsp90,Arg,Akt) -> Trash() kdeg_eNOS

Arg(eNOS) + eNOS(CaM,S1177~U,Arg) <-> eNOS(CaM,S1177~U,Arg!3).Arg(eNOS!3) kon_beNOS_Arg,koff_beNOS_Arg
Arg(eNOS) + CaM(eNOS!2).eNOS(CaM!2,S1177~U,Arg,Hsp90) <->
CaM(eNOS!2).eNOS(CaM!2,S1177~U,Arg!3,Hsp90).Arg(eNOS!3) kon_eNOS_Arg,koff_eNOS_Arg
CaM(eNOS!2).eNOS(CaM!2,S1177~U,Arg!3,Hsp90).Arg(eNOS!3) -> NO + Cit + CaM(eNOS!2).eNOS(CaM!2,S1177~U,Arg,Hsp90)
kcat_eNOS

Arg(eNOS) + eNOS(S1177~P,Arg,Hsp90,Akt) <-> eNOS(S1177~P,Arg!3,Hsp90,Akt).Arg(eNOS!3)
kon_peNOS_Arg,koff_peNOS_Arg
eNOS(CaM,S1177~P,Arg!3,Hsp90,Akt).Arg(eNOS!3) -> NO + Cit + eNOS(CaM,S1177~P,Arg,Hsp90,Akt)
kcat_peNOS
CaM(eNOS!1).eNOS(CaM!1,S1177~P,Arg!3,Hsp90,Akt).Arg(eNOS!3) -> NO + Cit +
CaM(eNOS!1).eNOS(CaM!1,S1177~P,Arg,Hsp90,Akt) kcat_peNOS

Arg(eNOS) + CaM(eNOS!2).eNOS(CaM!2,S1177~U,Arg,Hsp90!1,Akt).Hsp90(eNOS!1) <->
CaM(eNOS!2).eNOS(CaM!2,S1177~U,Arg!3,Hsp90!1,Akt).Hsp90(eNOS!1).Arg(eNOS!3) kon_eNOS_Arg_H,koff_eNOS_Arg_H
CaM(eNOS!2).eNOS(CaM!2,S1177~U,Arg!3,Hsp90!1,Akt).Hsp90(eNOS!1).Arg(eNOS!3) -> NO + Cit +
CaM(eNOS!2).eNOS(CaM!2,S1177~U,Arg,Hsp90!1,Akt).Hsp90(eNOS!1) kcat_eNOS_H

Arg(eNOS) + eNOS(S1177~P,Arg,Hsp90!1,Akt).Hsp90(eNOS!1) <->
eNOS(S1177~P,Arg!3,Hsp90!1,Akt).Hsp90(eNOS!1).Arg(eNOS!3) kon_peNOS_Arg_H,koff_peNOS_Arg_H
eNOS(CaM,S1177~P,Arg!3,Hsp90!1,Akt).Hsp90(eNOS!1).Arg(eNOS!3) -> NO + Cit +
eNOS(CaM,S1177~P,Arg,Hsp90!1,Akt).Hsp90(eNOS!1) kcat_peNOS_H
CaM(eNOS!2).eNOS(CaM!2,S1177~P,Arg!3,Hsp90!1,Akt).Hsp90(eNOS!1).Arg(eNOS!3) -> NO + Cit +
CaM(eNOS!2).eNOS(CaM!2,S1177~P,Arg,Hsp90!1,Akt).Hsp90(eNOS!1) kcat_peNOS_H

##### END Hsp90 module #####
##### START NO module #####
# NO activating sGC
sGC_b + NO <-> sGC_6c kon1,koff1
sGC_6c <-> sGC_5c kon2,koff2
sGC_5c + NO <-> sGC_5c_NO kon3,koff3
sGC_5c_NO <-> sGC_NO + NO kon4,koff4
sGC_NO <-> sGC + NO koff5,kon5
sGC <-> sGC_b koff6,kon6

NO -> NObuffer() kclearNO

GTP + sGC_5c -> cGMP + sGC_5c kcat_sGC
cGMP+PDE <-> cGMP_PDE kp1,kdp1
cGMP_PDE <-> cGMP_PDE_a kp2,kdp2

```

```
cGMP -> GMP                                RprodGMP
##### END NO module #####
```

```
end reaction rules
```

```
#####
#####
#####
```

```
end model
```

```
generate_network({overwrite=>1});
writeMfile({});
writeSBML({});
```
